# Supplementary material for: Identification and validation of the important role of YAP in the development and progression of Osteosarcoma
Source: Research Square preprint supplement (doi:10.21203/rs.3.rs-6614090/v1), 2025-07-08
Supplement: Supplementary file 1 [file 01e5df63254df7e7067202ac.xlsx]

## Sheet: Table 2
Table 2. GO enrichment list of CNV genes
Category	Term	Description	log(P-value)	Log(q-value)	Gene Symbols	Enrichment Ratio
GO Biological Processes	GO:0002250	adaptive immune response	-25.1538	-20.8104	JAG1,ANXA1,BCL6,C1S,C6,C7,C8A,C8B,C9,CD1A,CD1B,CD1C,CD1E,CD19,CLU,CTSL,CTSS,FCER1A,FCGR1A,FCGR1BP,FCGR2A,FCGR3A,HLA-DMA,HLA-DMB,HRAS,IFNG,IL6,IL6R,IL7R,INPP5D,JAK1,LY9,LYN,NBN,NFKB2,PDCD1,PRF1,RELB,RORC,SLAMF1,TRAV6,TRGC1,TRGC2,TRGV8,TRGV9,TRGV10,TRGV11,TFEB,RIPK2,IL18RAP,IL18R1,CD84,BCL10,TNFSF18,RNF8,EBAG9,CLEC10A,CXCL13,CD160,KLRK1,TNFRSF13B,PRKD2,TNFRSF21,TRDV3,TRDV2,TRDV1,TRDC,TRBV29-1,TRBV2…	147/655
GO Biological Processes	GO:0002252	immune effector process	-3.18007	-1.47787	JAG1,BCL6,C1S,C6,C7,C8A,C8B,C9,CD1C,CD2,CD19,CDH17,CLU,CRP,FCER1A,FCGR1A,FCGR1BP,FCGR2A,FCGR3A,GZMB,IFNG,IL6,IL6R,IL7R,INPP5D,JAK1,KIT,LY9,LYN,NBN,NOTCH2,PLD2,PRF1,MASP1,PTGER4,PTK2,PVR,RELB,RORC,S100A13,ST3GAL1,SLAMF1,TP53,GBF1,IL18R1,BCL10,TNFSF18,RNF8,EBAG9,VAV3,COLEC10,KLRK1,CD244,TREM2,TREM1,KMT2E,SLAMF7,SEMA4A,CRACR2A,SLAMF6,SH2D1B,MRGPRX2,GPR15LG,SCART1	64/474
GO Biological Processes	GO:0002460	adaptive immune response based on somatic recombination of immune receptors built from immunoglobulin superfamily domains	-2.55536	-1.06653	JAG1,BCL6,C1S,C6,C7,C8A,C8B,C9,CD19,CLU,FCER1A,FCGR1A,FCGR1BP,FCGR2A,FCGR3A,HRAS,IL6,IL6R,IL7R,INPP5D,JAK1,LY9,NBN,NFKB2,PRF1,RELB,RORC,IL18R1,BCL10,RNF8,EBAG9,CXCL13,SEMA4A,CRACR2A,SLAMF6,SCART1	36/248
GO Biological Processes	GO:0009617	response to bacterium	-13.8145	-9.77223	AHR,ABCD2,FASLG,ADGRB1,BMP2,BNIP3,BPI,C5AR1,CA3,CAV1,CD1D,CDK4,CRP,MAPK14,CYP2E1,CYP27B1,DIO2,FABP4,FCGR1A,FGF10,FKBP5,FMO1,GBP1,GBP2,GBP3,IL6,IL6R,IL7R,LYN,LYZ,NFKB2,NOTCH2,OPRK1,PDE4B,PI3,PLA2G2A,PRKD1,PRLR,PTGER4,PTGFR,PYGL,RPL30,S100A7,S100A8,S100A9,S100A12,SELE,SELP,SEMG1,SEMG2,SFTPD,SHC1,SLPI,TAC1,TRAV6,THRSP,TNFSF4,VIL1,FZD5,TFEB,SNX3,RIPK2,BCL10,WASL,TRIB1,B3GALT5,IFI44,CXCL13,PRDX3,ADAMT…	130/726
GO Biological Processes	GO:0042742	defense response to bacterium	-8.04444	-4.88335	ADGRB1,BPI,C5AR1,CRP,FCGR1A,GBP1,GBP2,GBP3,IL6,IL6R,IL7R,LYZ,NOTCH2,PI3,PLA2G2A,PRKD1,RPL30,S100A8,S100A9,S100A12,SELP,SEMG1,SEMG2,SFTPD,SHC1,SLPI,TAC1,TFEB,RIPK2,CXCL13,ADAMTS5,CD160,NLRP1,KLRK1,TRAV27,DROSHA,BPIFA1,TREM2,TREM1,RNF31,AKIRIN2,GSDMC,SLAMF8,PGLYRP4,S100A14,RNASE7,TIRAP,PGLYRP3,GBP4,GBP5,BPIFA2,WFDC10A,GBP6,DEFB110,DEFB113,DEFB114,WFDC9,GPR15LG,GBP7,RNASE9,DEFB133,RNASE13	62/324
GO Biological Processes	GO:0050830	defense response to Gram-positive bacterium	-3.23691	-1.50841	C5AR1,CRP,GBP2,IL6,IL6R,IL7R,LYZ,PLA2G2A,TAC1,RIPK2,KLRK1,TRAV27,DROSHA,PGLYRP4,RNASE7,TIRAP,PGLYRP3,GBP4,GBP6,DEFB114,GPR15LG,GBP7,RNASE9,RNASE13	24/131
GO Biological Processes	GO:0035239	tube morphogenesis	-13.4951	-9.62893	ADAM8,JAG1,ANGPT1,BMP2,BMP4,BMP5,ZFP36L1,KLF5,CAV1,KRIT1,CDC42,COL3A1,COL15A1,MAPK14,CTNS,EXT1,EYA1,FGF10,GATA4,GBX2,GDNF,GJA5,GLI1,GPR4,HAS2,FOXA1,HOXA5,HOXA11,HOXA13,HRG,CCN1,KDR,LEPR,LOXL2,MEOX2,MET,MYC,NFATC4,NKX3-1,NODAL,NOTCH2,CCN3,NPPC,NPR3,NRCAM,NTRK2,PBX1,PDGFRA,PKHD1,PRRX1,MED1,PRKACB,PRKCA,PRKD1,PTK2,S100A7,SDC4,SFRP5,SHC1,SOX9,SPARC,SRPK2,STK3,STK4,TFAP2B,TGFBR3,NR2E1,TWIST1,VEGFA,YWH…	125/694
GO Biological Processes	GO:0001944	vasculature development	-8.80868	-5.46535	ADAM8,JAG1,AHR,ANGPT1,BMP2,BMP4,ZFP36L1,KLF5,CAV1,KRIT1,CDC42,CDX2,COL1A1,COL1A2,COL3A1,COL15A1,MAPK14,EGR2,EYA1,FGF10,GBX2,GJA5,GPR4,HAS2,HOXA13,HRG,CCN1,KDR,LEPR,LOXL2,MDM2,MEOX2,NFATC4,NKX3-1,NODAL,NOTCH2,CCN3,NPPC,NPR3,NRCAM,NTRK2,PDGFRA,PRRX1,MED1,PRKCA,PRKD1,PTK2,S100A7,SGCB,SHC1,SRPK2,STK4,TFAP2B,TGFBR3,NR2E1,VEGFA,YWHAZ,LUZP1,FZD5,FZD8,PLPP3,ADAM15,SEMA5A,SEMA3E,PDCD6,RAMP1,YAP1,VAV3,SEMA…	94/556
GO Biological Processes	GO:0001568	blood vessel development	-7.75132	-4.76971	ADAM8,JAG1,AHR,ANGPT1,BMP4,ZFP36L1,KLF5,CAV1,KRIT1,CDC42,CDX2,COL1A1,COL1A2,COL3A1,COL15A1,MAPK14,EGR2,EYA1,FGF10,GBX2,GJA5,GPR4,HAS2,HOXA13,HRG,CCN1,KDR,LEPR,LOXL2,MDM2,MEOX2,NFATC4,NKX3-1,NOTCH2,CCN3,NPPC,NPR3,NRCAM,NTRK2,PDGFRA,PRRX1,MED1,PRKCA,PRKD1,PTK2,S100A7,SHC1,SRPK2,STK4,TFAP2B,TGFBR3,NR2E1,VEGFA,YWHAZ,LUZP1,FZD5,FZD8,PLPP3,ADAM15,SEMA5A,SEMA3E,PDCD6,RAMP1,YAP1,VAV3,SEMA3C,GNA13,ESM1,CD…	88/534
GO Biological Processes	GO:0048514	blood vessel morphogenesis	-7.61209	-4.68254	ADAM8,JAG1,ANGPT1,BMP4,ZFP36L1,KLF5,CAV1,KRIT1,CDC42,COL3A1,COL15A1,MAPK14,EYA1,FGF10,GBX2,GJA5,GPR4,HAS2,HOXA13,HRG,CCN1,KDR,LEPR,LOXL2,MEOX2,NFATC4,NOTCH2,CCN3,NPPC,NPR3,NRCAM,NTRK2,PDGFRA,PRRX1,MED1,PRKCA,PRKD1,PTK2,S100A7,SHC1,SRPK2,STK4,TFAP2B,TGFBR3,NR2E1,VEGFA,YWHAZ,FZD5,FZD8,ADAM15,SEMA5A,SEMA3E,PDCD6,RAMP1,YAP1,VAV3,GNA13,ESM1,CD160,ZFPM2,HEY1,TSPAN12,PRKD2,CLIC4,ANGPTL3,CHD7,C1GALT1,SEM…	76/441
GO Biological Processes	GO:0001525	angiogenesis	-6.90733	-4.15507	ADAM8,JAG1,ANGPT1,BMP4,KLF5,CAV1,KRIT1,CDC42,COL15A1,MAPK14,FGF10,GBX2,GJA5,GPR4,HRG,CCN1,KDR,LEPR,LOXL2,MEOX2,NFATC4,NOTCH2,CCN3,NPPC,NPR3,NRCAM,PDGFRA,MED1,PRKCA,PRKD1,PTK2,S100A7,SHC1,SRPK2,STK4,NR2E1,VEGFA,YWHAZ,FZD5,FZD8,ADAM15,SEMA5A,SEMA3E,PDCD6,RAMP1,VAV3,GNA13,ESM1,CD160,HEY1,TSPAN12,PRKD2,CLIC4,ANGPTL3,C1GALT1,SEMA4A,ADIPOR2,MMRN2,ADTRP,OTULIN,BMPER,THSD7A	62/347
GO Biological Processes	GO:0050678	regulation of epithelial cell proliferation	-10.6619	-6.92062	JAG1,ARNT,BMP4,BMP5,ZFP36L1,C5AR1,CAV1,RUNX2,KRIT1,CDC42,CDK4,CDK6,DAB2,DLX6,EXTL3,EYA1,F3,FGF10,FUT2,GLI1,HAS2,HMX2,HOXA5,HRAS,PDX1,KDR,LAMB1,MYC,NKX3-1,NODAL,NOTCH2,PKHD1,PLCG1,MED1,PRKCA,PRKD1,PRKDC,PTN,PTPRN,PEX2,ST8SIA1,SNAI2,SOX9,SPARC,STK3,STK4,TGFBR3,TGM1,TWIST1,VEGFA,GDF5,FZD7,TP63,SEMA5A,CYP7B1,MTSS1,PDCD6,YAP1,DEAF1,FRS2,CNMD,SULF1,ITGB3BP,PRKD2,TINF2,CRNN,IL26,JCAD,SAV1,BCL11B,MMRN2,P…	80/409
GO Biological Processes	GO:0008283	cell population proliferation	-8.57201	-5.30786	ASPH,BCL6,BMP2,BMP4,ZFP36L1,BYSL,CAV1,RUNX2,RUNX1,CD19,CDKN2C,CKS1B,CLU,COL3A1,MECOM,EXT1,EYA1,FGF10,FOXG1,FLT3,GBA1,GBX2,HGF,HMX2,HRAS,IL6,IL7,IL7R,PDX1,KCNA1,KDR,KIT,LEPR,LOXL2,MMP16,NBN,NDUFS2,NFIA,NKX3-1,NODAL,NOTCH2,CCN3,NPPC,NPR3,ROR1,DDR2,PBX1,PRRX1,MED1,PRKAR1A,RAP1B,ST8SIA1,SLAMF1,SLC2A4,SNAI2,SOX5,SOX9,STK3,STK4,TGFBR3,NR2E1,TP53,TWIST1,VEGFA,HMGA2,FZD6,FZD9,PSMG1,TP63,RIPK2,IL18RAP,EIF…	113/718
GO Biological Processes	GO:0050679	positive regulation of epithelial cell proliferation	-7.45367	-4.57895	ARNT,BMP4,BMP5,C5AR1,RUNX2,CDC42,DLX6,EXTL3,EYA1,F3,FGF10,HAS2,HMX2,HRAS,PDX1,KDR,LAMB1,MYC,NODAL,NOTCH2,PKHD1,PLCG1,MED1,PRKCA,PRKD1,PTN,PTPRN,ST8SIA1,SOX9,TGM1,TWIST1,VEGFA,FZD7,TP63,SEMA5A,CYP7B1,PDCD6,YAP1,ITGB3BP,PRKD2,CRNN,JCAD,OSR2,IQGAP3,NKX2-6,RICTOR	46/218
GO Biological Processes	GO:0050673	epithelial cell proliferation	-5.1701	-2.91164	BMP4,CAV1,RUNX2,EYA1,FGF10,HGF,HMX2,IL6,PDX1,KDR,KIT,LOXL2,NKX3-1,NOTCH2,CCN3,MED1,ST8SIA1,SOX9,STK3,STK4,VEGFA,TP63,SEMA5A,CYP7B1,MTSS1,YAP1,NCSTN,WNT16,SAV1,C1orf54,IQGAP3,NKX2-6,BMPER,SDR16C5,C6orf89	35/177
GO Biological Processes	GO:0007423	sensory organ development	-9.5975	-5.95314	JAG1,FASLG,BMP2,BMP4,BMP5,CALB1,COL11A1,CRYGA,CRYGB,CRYGC,CRYGD,CTNS,GSDME,DLX6,CLN8,EYA1,FGF10,FOXG1,GBX2,GJA8,GNAT2,GNGT1,HMX2,HOXA13,INHBA,KDR,KIT,NFIA,NOTCH2,NTRK2,ROR1,PBX1,PDGFRA,PI4KB,PITX3,PRRX1,MED1,RBP4,RP1,RPE65,SDC4,SOX9,SPARC,TFAP2B,NR2E1,TWIST1,VEGFA,FZD5,FZD6,BCAR3,PER2,SLC25A27,PLPPR4,MAFB,BCL2L11,SPRY2,NES,FRS2,VAX1,ZHX2,ATF6,ATG4B,CRB1,TSPAN12,NIPBL,CLIC4,STAU2,B9D1,BHLHE22,NEUR…	103/609
GO Biological Processes	GO:0001654	eye development	-5.58106	-3.18712	JAG1,FASLG,BMP4,CALB1,CRYGA,CRYGB,CRYGC,CRYGD,CTNS,CLN8,FGF10,GJA8,GNAT2,GNGT1,INHBA,KDR,NFIA,NOTCH2,NTRK2,PBX1,PDGFRA,PITX3,MED1,RBP4,RP1,RPE65,SOX9,TFAP2B,NR2E1,TWIST1,VEGFA,FZD5,BCAR3,PER2,NES,FRS2,VAX1,ZHX2,ATF6,CRB1,TSPAN12,NIPBL,CLIC4,STAU2,B9D1,WNT16,CHD7,LENEP,MDM1,GRHL3,SMOC1,BCL11B,LPCAT1,GRHL2,ZDHHC16,PYGO2,OPN4,OSR2,OLFM3,RDH10,HIPK1,ATOH7,OPN5,CRB2,PRSS56	65/403
GO Biological Processes	GO:0090596	sensory organ morphogenesis	-5.56188	-3.17759	JAG1,FASLG,BMP4,CALB1,COL11A1,CRYGB,DLX6,EYA1,FGF10,FOXG1,GBX2,GNAT2,GNGT1,HMX2,KDR,NOTCH2,NTRK2,PITX3,PRRX1,RBP4,RP1,SOX9,SPARC,TFAP2B,TWIST1,VEGFA,FZD5,FZD6,BCAR3,MAFB,SPRY2,FRS2,ZHX2,CRB1,TSPAN12,NIPBL,STAU2,WNT16,CHD7,CHRNA10,GRHL3,CDH23,PDZD7,CTHRC1,OSR2,OLFM3,LRIG3,HIPK1,CRB2,HMX3	50/283
GO Biological Processes	GO:0048880	sensory system development	-5.48037	-3.11932	JAG1,FASLG,BMP4,CALB1,CRYGA,CRYGB,CRYGC,CRYGD,CTNS,CLN8,FGF10,GJA8,GNAT2,GNGT1,INHBA,KDR,NFIA,NOTCH2,NTRK2,PBX1,PDGFRA,PITX3,MED1,RBP4,RP1,RPE65,SOX9,TFAP2B,NR2E1,TWIST1,VEGFA,FZD5,BCAR3,PER2,SEMA3A,NES,FRS2,VAX1,ZHX2,ATF6,CRB1,TSPAN12,NIPBL,CLIC4,STAU2,B9D1,WNT16,CHD7,LENEP,MDM1,GRHL3,SMOC1,BCL11B,LPCAT1,GRHL2,ZDHHC16,PYGO2,OPN4,OSR2,OLFM3,RDH10,HIPK1,ATOH7,OPN5,CRB2,PRSS56	66/414
GO Biological Processes	GO:0150063	visual system development	-5.43413	-3.08203	JAG1,FASLG,BMP4,CALB1,CRYGA,CRYGB,CRYGC,CRYGD,CTNS,CLN8,FGF10,GJA8,GNAT2,GNGT1,INHBA,KDR,NFIA,NOTCH2,NTRK2,PBX1,PDGFRA,PITX3,MED1,RBP4,RP1,RPE65,SOX9,TFAP2B,NR2E1,TWIST1,VEGFA,FZD5,BCAR3,PER2,NES,FRS2,VAX1,ZHX2,ATF6,CRB1,TSPAN12,NIPBL,CLIC4,STAU2,B9D1,WNT16,CHD7,LENEP,MDM1,GRHL3,SMOC1,BCL11B,LPCAT1,GRHL2,ZDHHC16,PYGO2,OPN4,OSR2,OLFM3,RDH10,HIPK1,ATOH7,OPN5,CRB2,PRSS56	65/407
GO Biological Processes	GO:0043010	camera-type eye development	-4.61998	-2.5172	JAG1,BMP4,CALB1,CRYGA,CRYGB,CRYGC,CRYGD,CTNS,CLN8,FGF10,GJA8,GNAT2,INHBA,KDR,NFIA,NOTCH2,NTRK2,PDGFRA,PITX3,MED1,RBP4,RP1,RPE65,SOX9,TFAP2B,NR2E1,TWIST1,VEGFA,FZD5,BCAR3,PER2,NES,FRS2,VAX1,ZHX2,CRB1,TSPAN12,CLIC4,B9D1,WNT16,CHD7,LENEP,MDM1,GRHL3,BCL11B,LPCAT1,GRHL2,PYGO2,OPN4,OSR2,RDH10,HIPK1,ATOH7,OPN5,CRB2,PRSS56	56/355
GO Biological Processes	GO:0048592	eye morphogenesis	-3.41912	-1.63569	JAG1,FASLG,BMP4,CALB1,CRYGB,GNAT2,GNGT1,KDR,NOTCH2,NTRK2,PITX3,RBP4,RP1,SOX9,TFAP2B,TWIST1,VEGFA,FZD5,BCAR3,FRS2,ZHX2,CRB1,TSPAN12,NIPBL,STAU2,WNT16,OLFM3,HIPK1,CRB2	29/166
GO Biological Processes	GO:0048593	camera-type eye morphogenesis	-2.95209	-1.32809	JAG1,BMP4,CALB1,CRYGB,GNAT2,KDR,NOTCH2,NTRK2,PITX3,RBP4,RP1,SOX9,TFAP2B,TWIST1,VEGFA,FZD5,BCAR3,FRS2,ZHX2,CRB1,TSPAN12,WNT16,HIPK1,CRB2	24/137
GO Biological Processes	GO:0060041	retina development in camera-type eye	-2.01689	-0.715763	CALB1,CLN8,GNAT2,NFIA,NTRK2,PDGFRA,MED1,RBP4,RP1,RPE65,SOX9,TFAP2B,NR2E1,PER2,ZHX2,CRB1,TSPAN12,CLIC4,CHD7,MDM1,LPCAT1,OPN4,HIPK1,ATOH7,CRB2	25/170
GO Biological Processes	GO:0000902	cell morphogenesis	-9.30407	-5.73889	ADAM8,ADARB1,ADORA2A,ADGRB1,BCL6,CDC42,CDH6,CDH12,CDH17,CHRNB2,CLU,CNTN1,CRYGB,MAPK14,DAB1,EFNA4,EGR2,ELAVL4,EXT1,FOXG1,GBX2,GDNF,GFRA3,GNAT2,HGF,HOXA13,IL7R,KIF5A,LMX1A,LYN,MAP1A,MATN2,MEF2A,MET,NFIA,NFATC4,NODAL,NOTCH2,NPTX1,NRCAM,PKHD1,MED1,PRKCZ,PTK2,PTN,S100A6,SDC2,SLC1A3,SLIT1,STK4,NR2E1,TNR,TRIO,VEGFA,LUZP1,LRP8,LMO4,WASL,SEMA5A,ARHGEF2,MAP4K4,FEZ2,SEMA3E,PLPPR4,SEMA3A,YAP1,STK25,SEMA6C,SE…	114/706
GO Biological Processes	GO:0031175	neuron projection development	-5.19239	-2.92094	ADARB1,ADORA2A,ADGRB1,CDC42,CHRNB2,CNTN1,DAB1,EFNA4,EGR2,ELAVL4,EXT1,FOXG1,GBX2,GDNF,GFRA3,IL6,KCNA1,KIF5A,LAMB1,LMX1A,LYN,MAP1A,MATN2,MEF2A,NFATC4,NOTCH2,NPTX1,NRCAM,PRKCZ,PTK2,PTN,RAB13,S100A6,SDC2,SDC4,SLIT1,NR2E1,TNR,TRIO,VEGFA,LRP8,LMO4,WASL,SEMA5A,MAP4K4,FEZ2,SEMA3E,PLPPR4,TSPAN2,SEMA3A,STK25,SEMA6C,SEMA3C,CSPG5,VAX1,STMN2,PTPRT,NTNG1,TNIK,ARC,DICER1,SNAPIN,LPAR3,CD2AP,FLRT2,KIFBP,TNFRSF21,…	100/717
GO Biological Processes	GO:0048667	cell morphogenesis involved in neuron differentiation	-5.13716	-2.89074	ADARB1,ADGRB1,CDC42,CHRNB2,CNTN1,DAB1,EFNA4,EGR2,ELAVL4,EXT1,FOXG1,GBX2,GDNF,GFRA3,KIF5A,LMX1A,MAP1A,MATN2,MEF2A,NFATC4,NOTCH2,NPTX1,NRCAM,PTK2,PTN,S100A6,SDC2,SLC1A3,SLIT1,NR2E1,TNR,TRIO,VEGFA,LRP8,LMO4,WASL,SEMA5A,FEZ2,SEMA3E,PLPPR4,SEMA3A,STK25,SEMA6C,SEMA3C,VAX1,NTNG1,ARC,LPAR3,CD2AP,FLRT2,KIFBP,ATL1,ARHGEF40,VANGL2,SEMA4G,CDH23,SEMA4A,BCL11B,PDZD7,PREX2,TET1,PARD6B,MYPN,DOCK7,CDHR1,ARHGEF25,…	69/449
GO Biological Processes	GO:0048858	cell projection morphogenesis	-5.09495	-2.86556	ADARB1,ADORA2A,ADGRB1,CDC42,CHRNB2,CNTN1,DAB1,EFNA4,EGR2,ELAVL4,EXT1,FOXG1,GBX2,GDNF,GFRA3,KIF5A,LMX1A,MAP1A,MATN2,MEF2A,NFATC4,NOTCH2,NPTX1,NRCAM,PRKCZ,PTK2,PTN,S100A6,SDC2,SLIT1,NR2E1,TNR,TRIO,VEGFA,LRP8,LMO4,WASL,SEMA5A,MAP4K4,FEZ2,SEMA3E,PLPPR4,SEMA3A,STK25,SEMA6C,SEMA3C,CSPG5,NES,VAX1,NTNG1,TNIK,ARC,DICER1,LPAR3,CD2AP,FLRT2,KIFBP,ATL1,PLEKHO1,ARHGEF40,ADCY10,VANGL2,SEMA4G,SEMA4A,BCL11B,PREX2…	76/510
GO Biological Processes	GO:0120039	plasma membrane bounded cell projection morphogenesis	-4.78376	-2.64995	ADARB1,ADORA2A,ADGRB1,CDC42,CHRNB2,CNTN1,DAB1,EFNA4,EGR2,ELAVL4,EXT1,FOXG1,GBX2,GDNF,GFRA3,KIF5A,LMX1A,MAP1A,MATN2,MEF2A,NFATC4,NOTCH2,NPTX1,NRCAM,PRKCZ,PTK2,PTN,S100A6,SDC2,SLIT1,NR2E1,TNR,TRIO,VEGFA,LRP8,LMO4,WASL,SEMA5A,MAP4K4,FEZ2,SEMA3E,PLPPR4,SEMA3A,STK25,SEMA6C,SEMA3C,VAX1,NTNG1,TNIK,ARC,DICER1,LPAR3,CD2AP,FLRT2,KIFBP,ATL1,PLEKHO1,ARHGEF40,ADCY10,VANGL2,SEMA4G,SEMA4A,BCL11B,PREX2,TET1,PARD…	74/503
GO Biological Processes	GO:0048812	neuron projection morphogenesis	-4.67472	-2.56439	ADARB1,ADORA2A,ADGRB1,CDC42,CHRNB2,CNTN1,DAB1,EFNA4,EGR2,ELAVL4,EXT1,FOXG1,GBX2,GDNF,GFRA3,KIF5A,LMX1A,MAP1A,MATN2,MEF2A,NFATC4,NOTCH2,NPTX1,NRCAM,PRKCZ,PTK2,PTN,S100A6,SDC2,SLIT1,NR2E1,TNR,TRIO,VEGFA,LRP8,LMO4,WASL,SEMA5A,MAP4K4,FEZ2,SEMA3E,PLPPR4,SEMA3A,STK25,SEMA6C,SEMA3C,VAX1,NTNG1,TNIK,ARC,DICER1,LPAR3,CD2AP,FLRT2,KIFBP,ATL1,ARHGEF40,ADCY10,VANGL2,SEMA4G,SEMA4A,BCL11B,PREX2,TET1,PARD6B,MYPN,…	73/498
GO Biological Processes	GO:0061564	axon development	-3.70272	-1.82478	ADARB1,ADGRB1,CHRNB2,CNTN1,DAB1,EFNA4,EGR2,EXT1,FOXG1,GBX2,GDNF,GFRA3,KCNA1,KIF5A,LMX1A,MAP1A,MATN2,NOTCH2,NPTX1,NRCAM,PTK2,S100A6,SLIT1,NR2E1,TNR,TRIO,VEGFA,LMO4,SEMA5A,FEZ2,SEMA3E,PLPPR4,TSPAN2,SEMA3A,STK25,SEMA6C,SEMA3C,CSPG5,VAX1,NTNG1,LPAR3,CD2AP,FLRT2,KIFBP,TNFRSF21,BHLHE22,NEUROG3,ATL1,ARHGEF40,VANGL2,SEMA4G,NEUROD6,SEMA4A,BCL11B,PARD6B,MYPN,DOCK7,ARHGEF25,GDF7,ATOH7,SEMA3D	61/427
GO Biological Processes	GO:0007409	axonogenesis	-3.32963	-1.57959	ADARB1,ADGRB1,CHRNB2,CNTN1,DAB1,EFNA4,EGR2,EXT1,FOXG1,GBX2,GDNF,GFRA3,KIF5A,LMX1A,MAP1A,MATN2,NOTCH2,NPTX1,NRCAM,PTK2,S100A6,SLIT1,NR2E1,TNR,TRIO,VEGFA,LMO4,SEMA5A,FEZ2,SEMA3E,PLPPR4,SEMA3A,STK25,SEMA6C,SEMA3C,VAX1,NTNG1,LPAR3,CD2AP,FLRT2,KIFBP,ATL1,ARHGEF40,VANGL2,SEMA4G,SEMA4A,BCL11B,PARD6B,MYPN,DOCK7,ARHGEF25,GDF7,SEMA3D	53/370
GO Biological Processes	GO:0007411	axon guidance	-3.21009	-1.49645	CNTN1,EFNA4,EGR2,EXT1,FOXG1,GBX2,GDNF,GFRA3,KIF5A,LMX1A,MATN2,NOTCH2,NRCAM,PTK2,SLIT1,TNR,TRIO,VEGFA,LMO4,SEMA5A,FEZ2,SEMA3E,SEMA3A,SEMA6C,SEMA3C,VAX1,FLRT2,ARHGEF40,VANGL2,SEMA4G,SEMA4A,BCL11B,MYPN,ARHGEF25,GDF7,SEMA3D	36/228
GO Biological Processes	GO:0097485	neuron projection guidance	-3.17426	-1.4734	CNTN1,EFNA4,EGR2,EXT1,FOXG1,GBX2,GDNF,GFRA3,KIF5A,LMX1A,MATN2,NOTCH2,NRCAM,PTK2,SLIT1,TNR,TRIO,VEGFA,LMO4,SEMA5A,FEZ2,SEMA3E,SEMA3A,SEMA6C,SEMA3C,VAX1,FLRT2,ARHGEF40,VANGL2,SEMA4G,SEMA4A,BCL11B,MYPN,ARHGEF25,GDF7,SEMA3D	36/229
GO Biological Processes	GO:0001775	cell activation	-9.06795	-5.5917	ADORA2A,ANXA1,AQP8,BCL6,ZFP36L1,KLF5,C5AR1,RUNX2,CD1C,CD1D,CD2,CD19,CD48,CDH17,CDK6,CHRNB2,CLU,COL3A1,MAPK14,CTSL,DGKB,DPP4,FCER1A,FCGR3A,FLT3,GBA1,HHEX,HOXA9,HRG,IFNG,IL6,IL6R,IL7,IL7R,IL15RA,JAK1,KIT,LEPR,LY9,LYN,MDM2,NBN,NFKB2,NOTCH2,P2RX1,PBX1,PDGFRA,PRF1,PRKDC,PTGER4,RELB,RORC,S100A12,S100A13,ST3GAL1,SLAMF1,TRGC1,TP53,TPD52,TNFSF4,TRPV1,FZD5,FZD6,FZD7,FZD8,FZD9,GBF1,RIPK2,IL18RAP,IL18R1,CD84…	119/754
GO Biological Processes	GO:0002521	leukocyte differentiation	-9.0057	-5.5917	ANXA1,AQP8,BCL6,BMP2,BMP4,ZFP36L1,CALCR,RUNX2,RUNX1,CD1D,CD19,CDC42,CDH17,CDK6,COX10,MAPK14,CTSK,CTSL,FLT3,GBA1,GLO1,HHEX,IFI16,IFNG,IL6,IL6R,IL7,IL7R,IL15RA,JAK1,KIT,LEPR,LY9,LYN,NOTCH2,PBX1,MED1,PRKDC,PTGER4,RELB,RORC,ST3GAL1,SLAMF1,TP53,TPD52,VEGFA,FZD5,FZD7,FZD8,FZD9,RIPK2,IL18R1,CCN4,IL1RL1,HDAC9,TOX,TESPA1,FARP2,MAFB,TSPAN2,DHRS2,RIPK3,SNX10,ZBTB7B,GPR89B,TREM2,CHD7,SLAMF8,SEMA4A,DCLRE1C,IL…	78/426
GO Biological Processes	GO:0030097	hemopoiesis	-8.98078	-5.5917	ADAR,JAG1,ANGPT1,ANXA1,AQP8,BCL6,BMP2,BMP4,ZFP36L1,CALCR,RUNX2,RUNX1,CD1D,CD19,CDC42,CDH17,CDK6,COX10,MAPK14,CTSK,CTSL,MECOM,EXT1,FLT3,GBA1,GLO1,HHEX,HOXA9,IFI16,IFNG,IL6,IL6R,IL7,IL7R,IL15RA,INHBA,JAK1,KDR,KIT,LEPR,LY9,LYN,NOTCH2,PBX1,PDGFRA,MED1,PRKDC,PTGER4,RELB,RORC,ST3GAL1,SLAMF1,SLC1A5,SLC8A3,SNAI2,SPTA1,STK3,STK4,TGFBR3,TP53,TPD52,VEGFA,FZD5,FZD7,FZD8,FZD9,RIPK2,IL18R1,CCN4,IL1RL1,MFHAS1,H…	111/690
GO Biological Processes	GO:0045321	leukocyte activation	-7.99618	-4.8833	ANXA1,AQP8,BCL6,ZFP36L1,C5AR1,RUNX2,CD1C,CD1D,CD2,CD19,CD48,CDH17,CDK6,CHRNB2,CLU,CTSL,DPP4,FCER1A,FCGR3A,FLT3,GBA1,HHEX,IFNG,IL6,IL6R,IL7,IL7R,IL15RA,JAK1,KIT,LEPR,LY9,LYN,NBN,NOTCH2,PBX1,PRF1,PRKDC,PTGER4,RELB,RORC,S100A12,S100A13,ST3GAL1,SLAMF1,TRGC1,TP53,TPD52,TNFSF4,TRPV1,FZD5,FZD7,FZD8,FZD9,RIPK2,IL18RAP,IL18R1,CD84,SKAP2,TNFSF18,RNF8,HDAC9,TOX,TESPA1,MAFB,TSPAN32,DHRS2,NDRG1,RIPK3,KLRK1,NC…	100/626
GO Biological Processes	GO:1903131	mononuclear cell differentiation	-7.75181	-4.76971	ANXA1,AQP8,BCL6,BMP4,ZFP36L1,RUNX2,CD1D,CD19,CDC42,CDH17,CDK6,CTSK,CTSL,FLT3,GBA1,HHEX,IFI16,IFNG,IL6,IL6R,IL7,IL7R,IL15RA,JAK1,KIT,LEPR,LY9,LYN,NOTCH2,PBX1,MED1,PRKDC,PTGER4,RELB,RORC,ST3GAL1,SLAMF1,TP53,TPD52,VEGFA,FZD5,FZD7,FZD8,FZD9,RIPK2,IL18R1,IL1RL1,HDAC9,TOX,TESPA1,MAFB,TSPAN2,DHRS2,RIPK3,ZBTB7B,GPR89B,TREM2,CHD7,SLAMF8,SEMA4A,DCLRE1C,BCL11B,DCSTAMP,CRACR2A,SLAMF6,GPR89A	66/360
GO Biological Processes	GO:0046649	lymphocyte activation	-7.33684	-4.50811	ANXA1,AQP8,BCL6,ZFP36L1,RUNX2,CD1C,CD1D,CD2,CD19,CD48,CDH17,CDK6,CHRNB2,CTSL,DPP4,FCGR3A,FLT3,GBA1,HHEX,IL6,IL6R,IL7,IL7R,IL15RA,JAK1,KIT,LEPR,LY9,NBN,NOTCH2,PBX1,PRF1,PRKDC,PTGER4,RELB,RORC,ST3GAL1,SLAMF1,TRGC1,TP53,TPD52,TNFSF4,FZD5,FZD7,FZD8,FZD9,RIPK2,IL18R1,CD84,SKAP2,TNFSF18,RNF8,HDAC9,TOX,TESPA1,MAFB,TSPAN32,RIPK3,KLRK1,NCSTN,CD2AP,TRDC,TRAC,ZBTB7B,GPR89B,CD244,TREM2,CHD7,SLAMF8,SLAMF7,CDH…	83/504
GO Biological Processes	GO:0030098	lymphocyte differentiation	-6.82178	-4.1017	ANXA1,AQP8,BCL6,ZFP36L1,RUNX2,CD1D,CD19,CDH17,CDK6,CTSL,FLT3,GBA1,HHEX,IL6,IL6R,IL7,IL7R,IL15RA,JAK1,KIT,LEPR,LY9,NOTCH2,PBX1,PRKDC,PTGER4,RELB,RORC,ST3GAL1,SLAMF1,TP53,TPD52,FZD5,FZD7,FZD8,FZD9,RIPK2,IL18R1,HDAC9,TOX,TESPA1,MAFB,RIPK3,ZBTB7B,GPR89B,CHD7,SLAMF8,SEMA4A,DCLRE1C,BCL11B,CRACR2A,SLAMF6,GPR89A	53/280
GO Biological Processes	GO:0030217	T cell differentiation	-5.85482	-3.39798	ANXA1,BCL6,ZFP36L1,RUNX2,CD1D,CDK6,CTSL,GBA1,IL6,IL6R,IL7,IL7R,JAK1,KIT,LEPR,LY9,PRKDC,PTGER4,RELB,RORC,TP53,FZD5,FZD7,FZD8,RIPK2,IL18R1,TOX,TESPA1,MAFB,RIPK3,ZBTB7B,GPR89B,CHD7,SEMA4A,BCL11B,CRACR2A,SLAMF6,GPR89A	38/187
GO Biological Processes	GO:0042110	T cell activation	-4.90293	-2.73858	ANXA1,BCL6,ZFP36L1,RUNX2,CD1C,CD1D,CD2,CDK6,CTSL,DPP4,GBA1,IL6,IL6R,IL7,IL7R,JAK1,KIT,LEPR,LY9,PRKDC,PTGER4,RELB,RORC,TRGC1,TP53,TNFSF4,FZD5,FZD7,FZD8,RIPK2,IL18R1,CD84,TNFSF18,TOX,TESPA1,MAFB,TSPAN32,RIPK3,NCSTN,TRDC,TRAC,ZBTB7B,GPR89B,TREM2,CHD7,SLAMF7,CDH26,SEMA4A,BCL11B,TNFAIP8L2,TREML2,CRACR2A,SLAMF9,SLAMF6,GPR89A	55/339
GO Biological Processes	GO:0033077	T cell differentiation in thymus	-2.79237	-1.22063	ZFP36L1,CDK6,GBA1,IL7R,PRKDC,TP53,FZD5,FZD7,FZD8,RIPK2,TESPA1,MAFB,RIPK3,BCL11B	14/65
Canonical Pathways	M5885	NABA MATRISOME ASSOCIATED	-8.59033	-5.30786	ADAM8,ANGPT1,ANXA1,ANXA7,ANXA13,FASLG,BMP2,BMP4,BMP5,BMP8B,CTSB,CTSK,CTSL,CTSS,FGF10,GDNF,HGF,HRG,HYAL1,IFNG,IL6,IL7,INHBA,LOXL2,MEP1A,MMP16,MUC1,MUC6,NODAL,OVGP1,SERPINA1,PI3,PLAU,PRSS1,MASP1,PTN,S100A2,S100A3,S100A4,S100A5,S100A6,S100A7,S100A8,S100A9,S100A10,S100A11,S100A12,S100A13,XCL1,SDC2,SDC4,SFRP5,SFTPD,SLPI,XCL2,TGM1,TIMP3,TLL2,TNFSF4,VEGFA,WNT8B,GDF5,ANXA9,ADAM15,TNFSF18,SEMA5A,ADAMTS1,S…	117/751
Canonical Pathways	M5883	NABA SECRETED FACTORS	-5.7045	-3.28406	ANGPT1,FASLG,BMP2,BMP4,BMP5,BMP8B,FGF10,GDNF,HGF,IFNG,IL6,IL7,INHBA,NODAL,PTN,S100A2,S100A3,S100A4,S100A5,S100A6,S100A7,S100A8,S100A9,S100A10,S100A11,S100A12,S100A13,XCL1,SFRP5,XCL2,TNFSF4,VEGFA,WNT8B,GDF5,TNFSF18,CXCL13,NRG3,FGF21,IL37,ANGPTL3,CRNN,IL22,WNT16,IL26,CCL28,S100A14,IL25,INHBE,TCHHL1,RPTN,S100A16,CBLN4,GDF7,S100A7A,BMP8A,FLG2,GDF6,S100A7L2	58/343
WikiPathways	WP5473	Cytokine cytokine receptor interaction	-3.7384	-1.85028	FASLG,BMP4,BMP5,BMP8B,GHR,IFNG,IL1R1,IL6,IL6R,IL7,IL7R,CXCR1,IL15RA,INHBA,LEPR,LIFR,NODAL,TNFRSF11B,PRLR,XCL1,XCL2,TNFSF4,IL1R2,GDF5,TNFRSF10A,IL18RAP,IL1RL2,IL18R1,IL1RL1,CXCL13,TNFRSF13B,IL37,TNFRSF21,IL22,IL26,CCL28,CXCL16,IL25,INHBE,GDF7,GDF6	41/255
GO Biological Processes	GO:0043009	chordate embryonic development	-8.33744	-5.10806	ANGPT1,ARNT,BMP2,BMP4,BMP5,ZFP36L1,BYSL,C6,SLC25A20,RUNX2,CDX2,COL1A1,COL3A1,COL11A1,DLX6,EXT1,EYA1,GBX2,FOXA1,HOXA5,HOXA9,HOXA11,HYAL1,CCN1,TM4SF1,MEOX2,MMP16,MYH6,NBN,NKX3-1,NODAL,CNOT2,NOTCH2,PBX1,PDGFRA,PLCG1,PRRX1,MED1,PRKACB,PRKDC,RAD51B,RBP4,SDC4,SOX9,SOX15,STK3,STK4,TBXT,TBX15,TP53,TWIST1,VEGFA,LUZP1,FZD5,TFEB,FZD6,YBX3,COPS3,LMO4,EIF2S2,BCL10,NOLC1,SEC24C,PDCD6,BCL2L11,NPM2,YAP1,SEMA3C,D…	105/658
GO Biological Processes	GO:0009792	embryo development ending in birth or egg hatching	-8.14706	-4.94986	ANGPT1,ARNT,BMP2,BMP4,BMP5,ZFP36L1,BYSL,C6,SLC25A20,RUNX2,CDX2,COL1A1,COL3A1,COL11A1,DLX6,EXT1,EYA1,GBX2,FOXA1,HOXA5,HOXA9,HOXA11,HYAL1,CCN1,TM4SF1,MEOX2,MMP16,MYH6,NBN,NKX3-1,NODAL,CNOT2,NOTCH2,PBX1,PDGFRA,PLCG1,PRRX1,MED1,PRKACB,PRKDC,RAD51B,RBP4,SDC4,SOX9,SOX15,STK3,STK4,TBXT,TBX15,TP53,TWIST1,VEGFA,LUZP1,FZD5,TFEB,FZD6,YBX3,COPS3,LMO4,EIF2S2,BCL10,NOLC1,SEC24C,PDCD6,BCL2L11,NPM2,YAP1,SEMA3C,D…	107/680
GO Biological Processes	GO:0001701	in utero embryonic development	-3.81107	-1.88408	ANGPT1,ARNT,BMP2,BMP5,ZFP36L1,BYSL,C6,SLC25A20,CDX2,COL3A1,CCN1,TM4SF1,MYH6,NBN,NODAL,CNOT2,NOTCH2,PDGFRA,PLCG1,MED1,RAD51B,SOX15,STK3,STK4,TP53,TWIST1,VEGFA,FZD5,TFEB,YBX3,COPS3,EIF2S2,SEC24C,BCL2L11,NPM2,YAP1,AKAP3,GNA13,ZFPM2,HEY1,C1orf43,KIFBP,LATS2,B9D1,NLE1,TENT5C,NSUN2,CHD7,OTUD7B,RIC8A,NECAB1,GRHL2,TET1,HORMAD1,SPECC1,TAF8,RDH10,RPL7L1	58/397
GO Biological Processes	GO:0001501	skeletal system development	-8.02256	-4.88335	BMP2,BMP4,BMP5,BMP8B,RUNX2,RUNX1,COL1A1,COL1A2,COL3A1,COL11A1,MAPK14,DLX6,ETS2,EXT1,EYA1,GHR,HAS2,HOXA5,HOXA9,HOXA10,HOXA11,HOXA13,HOXD8,HYAL1,CCN1,LEPR,MEF2D,MGP,MMP16,NFIA,NODAL,CCN3,NPPC,NPR3,DDR2,TNFRSF11B,PBX1,PDGFRA,PRRX1,MAP2K6,PTGER4,PTHLH,RBP4,SNAI2,SOX5,SOX9,TBX15,THBS3,TP53,TRPS1,TWIST1,VEGFA,HMGA2,GDF5,TP63,CCN4,DEAF1,RAI1,CNMD,SULF1,SLC39A14,NIPBL,SNX10,IFT25,RAB23,NLE1,MKS1,BPNT2,CH…	86/511
GO Biological Processes	GO:0051216	cartilage development	-6.15606	-3.59088	BMP2,BMP4,BMP5,BMP8B,RUNX2,RUNX1,COL1A1,COL3A1,COL11A1,MAPK14,EXT1,GHR,HOXA5,HOXA11,HYAL1,CCN1,MEF2D,MGP,NFIA,CCN3,NPPC,PRRX1,SNAI2,SOX5,SOX9,THBS3,HMGA2,GDF5,CNMD,SULF1,SLC39A14,BPNT2,PBXIP1,ADAMTS12,OSR2,RSPO2,BMP8A	37/175
GO Biological Processes	GO:0061448	connective tissue development	-5.70311	-3.28406	BMP2,BMP4,BMP5,BMP8B,RUNX2,RUNX1,COL1A1,COL3A1,COL11A1,MAPK14,EXT1,GHR,GPR4,FOXA1,HOXA5,HOXA11,HRAS,HYAL1,CCN1,MEF2D,MGP,NFIA,CCN3,NPPC,PRRX1,RORC,SNAI2,SOX5,SOX9,THBS3,HMGA2,GDF5,RASAL2,CNMD,SULF1,SLC39A14,CD2AP,BPNT2,PBXIP1,ADAMTS12,OSR2,VPS13B,RSPO2,BMP8A	44/234
GO Biological Processes	GO:0002062	chondrocyte differentiation	-4.92158	-2.74557	BMP2,BMP4,RUNX2,RUNX1,COL3A1,COL11A1,MAPK14,EXT1,HOXA11,MEF2D,CCN3,NPPC,SOX5,SOX9,HMGA2,GDF5,SULF1,SLC39A14,BPNT2,ADAMTS12,OSR2	21/84
GO Biological Processes	GO:0048705	skeletal system morphogenesis	-3.71664	-1.83421	BMP4,RUNX2,COL1A1,COL3A1,COL11A1,MAPK14,EXT1,EYA1,GHR,HAS2,HOXA5,HOXA9,HOXA11,HOXD8,HYAL1,MEF2D,MGP,MMP16,NODAL,NPPC,PDGFRA,PRRX1,SOX5,SOX9,TBX15,THBS3,TWIST1,VEGFA,NIPBL,RAB23,NLE1,BPNT2,PAPPA2,SPEF2,GRHL2,OSR2,RDH10,RFLNB	38/231
GO Biological Processes	GO:0060348	bone development	-2.75452	-1.19223	BMP2,BMP4,RUNX2,COL1A1,COL3A1,MAPK14,EXT1,GHR,HAS2,HOXA11,LEPR,MEF2D,MMP16,NPPC,DDR2,MAP2K6,PTGER4,SOX9,THBS3,TP53,TWIST1,CCN4,SULF1,SNX10,RAB23,BPNT2,PAPPA2,ADAMTS12,OSR2,ASXL1,RANBP3L	31/199
GO Biological Processes	GO:0060350	endochondral bone morphogenesis	-2.65619	-1.1251	BMP4,RUNX2,COL1A1,COL3A1,EXT1,GHR,HOXA11,MEF2D,MMP16,NPPC,SOX9,THBS3,BPNT2	13/60
GO Biological Processes	GO:0060349	bone morphogenesis	-2.48756	-1.0279	BMP4,RUNX2,COL1A1,COL3A1,EXT1,GHR,HAS2,HOXA11,MEF2D,MMP16,NPPC,SOX9,THBS3,TWIST1,RAB23,BPNT2,PAPPA2,OSR2	18/100
GO Biological Processes	GO:0002063	chondrocyte development	-2.08276	-0.752983	RUNX2,COL11A1,EXT1,HOXA11,SOX9,SULF1,BPNT2	7/27
GO Biological Processes	GO:0040011	locomotion	-7.92942	-4.84137	ADAM8,ANGPT1,ANXA1,RHOG,ATP1A2,BMP4,C5AR1,MAPK14,DPP4,RCAN1,FGF10,GDNF,HGF,HRAS,HRG,CCN1,IL6,IL6R,CXCR1,KIT,MET,CCN3,NPPC,PDE4B,PDGFRA,ENPP2,PLAU,PLD1,PTN,RAB13,RNASE2,S100A4,S100A8,S100A9,S100A12,XCL1,SFTPD,SLAMF1,SLIT1,XCL2,VEGFA,PIP5K1A,GBF1,SEMA5A,CYP7B1,SEMA3E,SEMA3A,VAV3,SEMA3C,CXCL13,COLEC10,NRG3,FLRT2,TREM1,MACO1,CCL28,SLAMF8,SEMA4G,CXCL16,ELMO2,SEMA4A,OPN4,SEMA3D,DEFB110,DEFB114,GPR15LG,…	67/364
GO Biological Processes	GO:0042330	taxis	-7.83979	-4.81396	ADAM8,ANGPT1,ANXA1,RHOG,BMP4,C5AR1,MAPK14,DPP4,FGF10,GDNF,HGF,HRAS,HRG,CCN1,IL6,IL6R,CXCR1,KIT,MET,CCN3,PDE4B,PDGFRA,ENPP2,PLAU,PLD1,PTN,RAB13,RNASE2,S100A4,S100A8,S100A9,S100A12,XCL1,SFTPD,SLAMF1,SLIT1,XCL2,VEGFA,PIP5K1A,GBF1,SEMA5A,CYP7B1,SEMA3E,SEMA3A,VAV3,SEMA3C,CXCL13,COLEC10,NRG3,FLRT2,TREM1,MACO1,CCL28,SLAMF8,SEMA4G,CXCL16,ELMO2,SEMA4A,OPN4,SEMA3D,DEFB110,DEFB114,GPR15LG,DEFB133	64/343
GO Biological Processes	GO:0006935	chemotaxis	-7.561	-4.662	ADAM8,ANGPT1,ANXA1,RHOG,BMP4,C5AR1,MAPK14,DPP4,FGF10,GDNF,HGF,HRAS,HRG,CCN1,IL6,IL6R,CXCR1,KIT,MET,CCN3,PDE4B,PDGFRA,ENPP2,PLAU,PLD1,PTN,RAB13,RNASE2,S100A4,S100A8,S100A9,S100A12,XCL1,SFTPD,SLAMF1,SLIT1,XCL2,VEGFA,PIP5K1A,GBF1,SEMA5A,CYP7B1,SEMA3E,SEMA3A,VAV3,SEMA3C,CXCL13,COLEC10,NRG3,FLRT2,TREM1,MACO1,CCL28,SLAMF8,SEMA4G,CXCL16,ELMO2,SEMA4A,SEMA3D,DEFB110,DEFB114,GPR15LG,DEFB133	63/341
GO Biological Processes	GO:0060326	cell chemotaxis	-4.13186	-2.11894	ADAM8,ANXA1,RHOG,C5AR1,HGF,IL6,IL6R,CXCR1,KIT,CCN3,PDE4B,PDGFRA,PTN,RAB13,S100A8,S100A9,S100A12,XCL1,SFTPD,SLAMF1,XCL2,VEGFA,PIP5K1A,GBF1,SEMA5A,CYP7B1,VAV3,CXCL13,TREM1,CCL28,SLAMF8,CXCL16,ELMO2,DEFB110,DEFB114,GPR15LG,DEFB133	37/213
GO Biological Processes	GO:0050900	leukocyte migration	-3.34149	-1.58097	ADAM8,ANXA1,C5AR1,CDC42,EPS8,EXT1,GBA1,GNAI1,IL6,IL6R,CXCR1,KIT,LYN,PDE4B,PTN,S100A8,S100A9,S100A12,XCL1,SELE,SELL,SELP,SFTPD,SLAMF1,VEGFA,GBF1,CYP7B1,VAV3,CXCL13,TREM1,CCL28,SLAMF8,CXCL16,WNK1,TRIM55,NLRP12,MCOLN2,GPR15LG	38/241
GO Biological Processes	GO:0030595	leukocyte chemotaxis	-3.08236	-1.42014	ADAM8,ANXA1,C5AR1,IL6,IL6R,CXCR1,KIT,PDE4B,PTN,S100A8,S100A9,S100A12,XCL1,SFTPD,SLAMF1,VEGFA,GBF1,CYP7B1,VAV3,CXCL13,TREM1,CCL28,SLAMF8,CXCL16,GPR15LG	25/142
GO Biological Processes	GO:0071674	mononuclear cell migration	-2.8884	-1.28858	ADAM8,ANXA1,CDC42,EPS8,EXT1,GBA1,GNAI1,IL6,IL6R,CXCR1,S100A12,XCL1,SFTPD,CYP7B1,CXCL13,CXCL16,WNK1,TRIM55,NLRP12,MCOLN2,GPR15LG	21/115
GO Biological Processes	GO:0030593	neutrophil chemotaxis	-2.59001	-1.08427	C5AR1,CXCR1,PDE4B,S100A8,S100A9,S100A12,XCL1,GBF1,VAV3,CXCL13,TREM1,CCL28	12/54
GO Biological Processes	GO:1990266	neutrophil migration	-2.33647	-0.923584	C5AR1,CXCR1,PDE4B,S100A8,S100A9,S100A12,XCL1,GBF1,VAV3,CXCL13,TREM1,CCL28,MCOLN2	13/65
GO Biological Processes	GO:0071621	granulocyte chemotaxis	-2.14365	-0.7942	ANXA1,C5AR1,CXCR1,PDE4B,S100A8,S100A9,S100A12,XCL1,VEGFA,GBF1,VAV3,CXCL13,TREM1,CCL28	14/76
GO Biological Processes	GO:0010817	regulation of hormone levels	-7.83979	-4.81396	ADCY8,ALDH1A1,ANXA1,ARNT,ATP1A1,BCAT2,BMP2,BMP5,CAMK2G,CMA1,CTNS,CTSB,CTSK,CTSL,CYP2C18,CYP11B2,CYP17A1,CYP26A1,CYP27B1,DAB2,DIO2,DPP4,ENSA,GHR,GLP1R,GLUD1,PRLHR,FOXA1,IFNG,IL6,INHBA,PDX1,LYN,MEP1A,NKX3-1,CCN3,OPRK1,PRKN,PDGFRA,MED1,PRKAR1A,PRKCA,PRKD1,PTPRN,RBP4,RPE65,SCT,SREBF1,TACR2,TFAP2B,TG,PLA2G7,PER2,CLOCK,RIMS2,DHRS2,CPQ,DHRS4,PASK,SIRT4,SIRT3,SLC7A8,SLC39A14,MPC2,PCLO,KCNK9,HSD17B7,TM7SF…	90/548
GO Biological Processes	GO:0042445	hormone metabolic process	-3.79166	-1.87808	ALDH1A1,CMA1,CTSB,CTSK,CTSL,CYP2C18,CYP11B2,CYP17A1,CYP26A1,DIO2,DPP4,GHR,PRLHR,FOXA1,INHBA,MEP1A,PDGFRA,MED1,RBP4,RPE65,TG,PLA2G7,DHRS2,CPQ,DHRS4,HSD17B7,UGT1A8,ACE2,SLC26A7,RDH10,SLC30A8,SDR16C5,CYP26C1,AKR1B15,MBOAT4	35/205
GO Biological Processes	GO:0045087	innate immune response	-7.83507	-4.81396	ADAR,ADARB1,ANXA1,APCS,FASLG,ATP1B1,ADGRB1,POLR3D,BPI,C1S,C6,C7,C8A,C8B,C9,CD1D,CD2,CD58,CDC42,CLU,CRP,CYP27B1,FCGR1A,FCGR3A,GBP1,GBP2,GBP3,GZMB,HK1,IFI16,IFNG,JAK1,LY9,PI3,PRKD1,PRKDC,MASP1,PVR,RELB,RNASE2,S100A8,S100A9,S100A12,SFTPD,SHMT2,SKP2,SLAMF1,SLPI,SMPD1,UAP1,SRPK2,TRIM21,TAC1,TRGV8,TRGV9,TP53,UBA7,TFEB,ADAM15,RIPK2,IL1RL2,CD84,BCL10,ARHGEF2,DDX21,MFHAS1,AIM2,RB1CC1,CRISP3,CLEC10A,COLEC1…	119/791
GO Biological Processes	GO:0032103	positive regulation of response to external stimulus	-6.98309	-4.21955	ADAM8,POLR3D,C5AR1,CAV1,CD1D,CTSS,F3,FABP4,FCGR1A,FGF10,GBP1,GBP2,GBP3,GPR4,HRG,IFI16,IFNG,IL6,IL6R,KDR,LYN,MET,MNDA,PDGFRA,PGC,PLA2G2A,PLA2G5,PLAU,MED1,PRKCA,PRKD1,PRKDC,MAP2K6,PTGER3,PTGER4,PTK2,PTN,PVR,S100A7,S100A8,S100A9,S100A12,XCL1,SLAMF1,TNFSF4,VEGFA,PLA2G7,KLRC4,RIPK2,IL18RAP,CCN4,BCL10,TNFSF18,SEMA5A,IL1RL1,OSMR,MFHAS1,AIM2,CLOCK,PUM1,CXCL13,COLEC10,POLR3C,CD160,NLRP1,KLRK1,LY96,PRKD2,L…	92/588
GO Biological Processes	GO:0031349	positive regulation of defense response	-5.42155	-3.07386	ADAM8,POLR3D,CAV1,CD1D,CTSS,FABP4,FCGR1A,GBP1,GBP2,GBP3,GPR4,IFI16,IFNG,IL6,LYN,MNDA,PGC,PLA2G2A,PLA2G5,MED1,PRKD1,PRKDC,MAP2K6,PTGER3,PTGER4,PVR,S100A8,S100A9,S100A12,TNFSF4,PLA2G7,KLRC4,RIPK2,IL18RAP,CCN4,BCL10,TNFSF18,IL1RL1,OSMR,MFHAS1,AIM2,CLOCK,PUM1,COLEC10,POLR3C,CD160,NLRP1,KLRK1,LY96,LATS2,TREM2,RNF31,AKIRIN2,PSPC1,CAMK2N1,DHX33,S100A14,MMRN2,OTULIN,NLRP12,TIRAP,SLAMF6,GBP5,SH2D1B,LRRK2,…	70/449
GO Biological Processes	GO:0050778	positive regulation of immune response	-5.12394	-2.88098	ADAM8,ANXA1,POLR3D,C1S,C5AR1,C6,C7,C8A,C8B,C9,CAV1,CD1A,CD1B,CD1C,CD1D,CD1E,CD19,CLU,CTSS,GSDME,FCGR1A,FYB1,GBP2,HLA-DMA,HLA-DMB,HRAS,HRG,IFI16,IFNG,IL1R1,IL6,INPP5D,LYN,MNDA,PDE4B,PGC,PLA2G5,PLCG1,PLD2,MED1,PRKAA1,PRKCH,PRKD1,PRKCZ,PRKDC,MAP2K6,MASP1,PTK2,PVR,XCL1,SLAMF1,TRGC1,TRGC2,TNFSF4,FZD5,KLRC4,RIPK2,IL18RAP,IL18R1,BCL10,MFHAS1,AIM2,PUM1,TESPA1,VAV3,COLEC10,POLR3C,CD160,NLRP1,KLRK1,UBR2,CD…	96/684
GO Biological Processes	GO:0002833	positive regulation of response to biotic stimulus	-3.16383	-1.46494	ADAM8,POLR3D,CAV1,CD1D,CTSS,GSDME,GBP2,HRG,IFI16,LYN,MNDA,PGC,PLA2G5,MED1,PRKAA1,PRKCA,PRKD1,PRKDC,MAP2K6,PVR,KLRC4,RIPK2,IL18RAP,BCL10,MFHAS1,AIM2,PUM1,COLEC10,POLR3C,CD160,NLRP1,KLRK1,LY96,LATS2,AKIRIN2,PSPC1,DHX33,S100A14,MMRN2,OTULIN,TIRAP,SLAMF6,GBP5,SH2D1B,PYHIN1,TREML4,NLRP10,SCIMP	48/332
GO Biological Processes	GO:0045089	positive regulation of innate immune response	-2.55313	-1.06653	ADAM8,POLR3D,CAV1,CD1D,CTSS,GBP2,IFI16,LYN,MNDA,PLA2G5,MED1,PRKD1,PRKDC,MAP2K6,PVR,KLRC4,RIPK2,IL18RAP,BCL10,MFHAS1,AIM2,PUM1,COLEC10,POLR3C,CD160,NLRP1,KLRK1,LY96,LATS2,AKIRIN2,PSPC1,DHX33,S100A14,OTULIN,TIRAP,SLAMF6,GBP5,SH2D1B,PYHIN1,TREML4,NLRP10,SCIMP	42/301
GO Biological Processes	GO:0006954	inflammatory response	-7.6732	-4.71008	ADAM8,ADCY8,ADORA2A,PARP4,ALOX15,ANXA1,APCS,BCL6,BMP2,C5AR1,CD5L,CLU,LTB4R,CRP,GSDME,EXT1,F3,FCER1A,FCGR1A,FCGR1BP,FCGR2A,FCGR3A,GNAT2,GZMB,HK1,HYAL1,IFI16,IFNG,IL1R1,IL6,IL6R,KIT,LYN,LYZ,NFATC4,NOTCH2,P2RX1,SERPINA1,PLA2G2A,PRKD1,PRKCZ,PTGER3,PTGER4,PTGFR,PTN,RELB,S100A8,S100A9,S100A12,XCL1,SELE,SELP,SLAMF1,TRIM21,XCL2,TAC1,TNFSF4,TRPV1,RIPK2,IL18RAP,IL1RL2,IL18R1,IL1RL1,MFHAS1,CD163,AIM2,HDAC9,…	93/577
GO Biological Processes	GO:0050727	regulation of inflammatory response	-5.08897	-2.86556	ADAM8,ADORA2A,AHR,ALOX15,ANXA1,APCS,ARNT,BCL6,CMA1,MAPK14,EXTL3,FABP4,FANCA,FCGR1A,GBA1,GBP1,GBP2,GBP3,GPR4,HGF,IFNG,IL1R1,IL6,LYN,CCN3,PLA2G2A,PLCG1,PSMB4,PTGER3,PTGER4,S100A8,S100A9,S100A12,XCL1,SELE,TNFSF4,PLA2G7,IL1RL2,CCN4,TNFSF18,IL1RL1,OSMR,MFHAS1,AIM2,CLOCK,NLRP1,SYT11,IL37,DROSHA,IL22,CALHM2,TREM2,CAMK2N1,NLRP2,ASH1L,SLAMF8,ACE2,TNFAIP8L2,ADAMTS12,OTULIN,NLRP12,GBP5,LRRK2,NLRP7,DEFB114,R…	68/442
GO Biological Processes	GO:0050729	positive regulation of inflammatory response	-4.31461	-2.26575	ADAM8,FABP4,FCGR1A,GBP1,GBP2,GBP3,GPR4,IFNG,IL6,PLA2G2A,PTGER3,PTGER4,S100A8,S100A9,S100A12,TNFSF4,PLA2G7,CCN4,TNFSF18,IL1RL1,OSMR,AIM2,CLOCK,NLRP1,TREM2,CAMK2N1,NLRP12,GBP5,LRRK2,DEFB114,NLRP10	31/163
GO Biological Processes	GO:0043408	regulation of MAPK cascade	-7.6109	-4.68254	ADAM8,ALOX15,ANGPT1,BMP2,BMP4,C5AR1,CALCR,CAV1,CDC42,DAB2,GSDME,DRD4,DUSP8,MECOM,FGF10,FLT3,GBA1,GBP1,GHR,HGF,HRAS,CCN1,IL6,IL6R,INHBA,KDR,KIT,LYN,MYC,NODAL,NOTCH2,NTRK2,DDR2,OPRK1,PRKN,PDGFRA,PKHD1,PLA2G2A,PLA2G5,PRKCA,PRKCZ,MAP2K6,RAP1B,S100A7,S100A12,SDCBP,MAP2K4,SHC1,SLA,SLAMF1,SMPD1,STK3,STK4,VEGFA,YWHAZ,PSCA,FZD7,BCAR3,RIPK2,MFHAS1,MAP4K4,NCOR1,RB1CC1,SPRY2,SEMA3A,STK25,FRS2,FZD10,TNIK,SIRT…	103/662
GO Biological Processes	GO:0043410	positive regulation of MAPK cascade	-6.06761	-3.52362	ADAM8,ALOX15,ANGPT1,BMP2,BMP4,C5AR1,CALCR,CDC42,GSDME,DRD4,FGF10,FLT3,GHR,HGF,HRAS,IL6,IL6R,INHBA,KDR,KIT,LYN,NODAL,NOTCH2,NTRK2,DDR2,OPRK1,PDGFRA,PLA2G2A,PLA2G5,PRKCA,PRKCZ,MAP2K6,RAP1B,S100A7,S100A12,SDCBP,MAP2K4,SHC1,SLAMF1,STK3,VEGFA,FZD7,BCAR3,RIPK2,MFHAS1,RB1CC1,SPRY2,SEMA3A,STK25,FRS2,FZD10,TNIK,LPAR3,PRKD2,FGF21,WNT16,MBIP,TREM2,IL26,DHX33,PELI2,JCAD,AVPI1,CRACR2A,ZNF622,TIRAP,FCRL3,LRRK2…	74/464
GO Biological Processes	GO:0070372	regulation of ERK1 and ERK2 cascade	-5.33554	-3.01621	ALOX15,ANGPT1,BMP2,BMP4,C5AR1,CALCR,DAB2,FGF10,GBP1,HRAS,CCN1,INHBA,KDR,LYN,NODAL,NOTCH2,DDR2,PDGFRA,PKHD1,PLA2G2A,PLA2G5,PRKCA,PRKCZ,RAP1B,S100A7,SHC1,SLAMF1,VEGFA,YWHAZ,PSCA,RIPK2,MFHAS1,SPRY2,FRS2,SIRT3,PRKD2,FGF21,TREM2,IL26,LMO3,CHRNA10,NDRG2,ACE2,DUSP26,NLRP12,TIRAP,BMPER,FFAR4,DUSP29,NPSR1,SCIMP	51/296
GO Biological Processes	GO:0070374	positive regulation of ERK1 and ERK2 cascade	-4.1003	-2.09742	ALOX15,ANGPT1,BMP2,BMP4,C5AR1,CALCR,FGF10,HRAS,INHBA,KDR,NODAL,NOTCH2,DDR2,PDGFRA,PLA2G2A,PLA2G5,PRKCA,PRKCZ,RAP1B,S100A7,SHC1,SLAMF1,VEGFA,RIPK2,MFHAS1,SPRY2,PRKD2,FGF21,TREM2,IL26,TIRAP,BMPER,FFAR4,NPSR1,SCIMP	35/198
GO Biological Processes	GO:2000147	positive regulation of cell motility	-7.55817	-4.662	ADAM8,ANGPT1,ANXA1,ARHGAP5,BCL6,BMP2,BMP4,C5AR1,CAV1,CDC42,COL1A1,DAB2,F3,FGF10,GLI1,HAS2,HGF,HRAS,IFNG,CCN1,IL1R1,IL6,IL6R,KDR,KIT,LAMB1,LYN,MDM2,MET,DDR2,PDGFRA,ENPP2,PLAU,PLCG1,PRKCA,PRKD1,PTK2,PTN,S100A7,S100A11,XCL1,SDCBP,SELE,SELP,SLAMF1,SNAI2,SOX9,SPARC,STK4,XCL2,TAC1,TACR2,TAC3,TGFBR3,GFUS,TWIST1,VEGFA,VIL1,PLA2G7,PLPP3,CCN4,CPNE3,TNFSF18,SEMA5A,ARHGEF2,MAP4K4,ADAMTS1,SEMA3E,HDAC9,SPOCK2,…	99/630
GO Biological Processes	GO:0030335	positive regulation of cell migration	-7.14725	-4.34799	ADAM8,ANGPT1,ANXA1,ARHGAP5,BMP2,BMP4,C5AR1,CAV1,CDC42,COL1A1,DAB2,F3,FGF10,GLI1,HAS2,HGF,HRAS,IFNG,CCN1,IL1R1,IL6,IL6R,KDR,KIT,LAMB1,LYN,MDM2,MET,DDR2,PDGFRA,ENPP2,PLAU,PLCG1,PRKCA,PRKD1,PTK2,PTN,S100A7,S100A11,XCL1,SDCBP,SELE,SELP,SLAMF1,SNAI2,SOX9,SPARC,STK4,XCL2,TGFBR3,GFUS,TWIST1,VEGFA,VIL1,PLA2G7,PLPP3,CCN4,CPNE3,TNFSF18,SEMA5A,ARHGEF2,MAP4K4,ADAMTS1,SEMA3E,HDAC9,PDCD6,SPRY2,SEMA3A,ATP8A1,SE…	94/600
GO Biological Processes	GO:0040017	positive regulation of locomotion	-7.01613	-4.23003	ADAM8,ANGPT1,ANXA1,ARHGAP5,BCL6,BMP2,BMP4,C5AR1,CAV1,CDC42,COL1A1,DAB2,F3,FGF10,GLI1,HAS2,HGF,HRAS,IFNG,CCN1,IL1R1,IL6,IL6R,KDR,KIT,LAMB1,LYN,MDM2,MET,DDR2,PDGFRA,ENPP2,PLAU,PLCG1,PRKCA,PRKD1,PTK2,PTN,S100A7,S100A11,XCL1,SDCBP,SELE,SELP,SLAMF1,SNAI2,SOX9,SPARC,STK4,XCL2,TAC1,TACR2,TAC3,TGFBR3,GFUS,TWIST1,VEGFA,VIL1,PLA2G7,PLPP3,CCN4,CPNE3,TNFSF18,SEMA5A,ARHGEF2,MAP4K4,ADAMTS1,SEMA3E,HDAC9,SPOCK2,…	99/646
GO Biological Processes	GO:0050920	regulation of chemotaxis	-3.62796	-1.76893	C5AR1,DPP4,F3,FGF10,HRG,IL6,IL6R,KDR,LYN,MET,CCN3,PDGFRA,PRKD1,PTK2,PTN,S100A7,XCL1,SLAMF1,SLIT1,VEGFA,PLA2G7,TNFSF18,SEMA5A,CXCL13,KLRK1,PRKD2,CYRIB,TREM2,KIF21A,SLAMF8,CAMK1D,S100A14,WNK1,MCU,TIRAP,ATOH7	36/217
GO Biological Processes	GO:0050921	positive regulation of chemotaxis	-3.25905	-1.52532	C5AR1,F3,FGF10,IL6,IL6R,KDR,MET,PDGFRA,PRKD1,PTK2,PTN,S100A7,XCL1,SLAMF1,VEGFA,PLA2G7,TNFSF18,SEMA5A,CXCL13,PRKD2,TREM2,CAMK1D,S100A14,WNK1,MCU,TIRAP	26/146
GO Biological Processes	GO:0002688	regulation of leukocyte chemotaxis	-2.6914	-1.14893	C5AR1,DPP4,IL6,IL6R,LYN,CCN3,PTK2,PTN,S100A7,XCL1,SLAMF1,VEGFA,PLA2G7,TNFSF18,CXCL13,KLRK1,SLAMF8,CAMK1D,S100A14,WNK1,MCU,TIRAP	22/127
GO Biological Processes	GO:0002685	regulation of leukocyte migration	-2.65669	-1.1251	ADAM8,ANXA1,BMP5,C5AR1,DPP4,IL1R1,IL6,IL6R,LYN,CCN3,PTGER4,PTK2,PTN,S100A7,XCL1,SELE,SELP,SLAMF1,VEGFA,PLA2G7,WASL,TNFSF18,CXCL13,RIPK3,KLRK1,TREM2,CCL28,SLAMF8,CAMK1D,S100A14,WNK1,ADTRP,MCU,TIRAP,GPR15LG	35/236
GO Biological Processes	GO:0002690	positive regulation of leukocyte chemotaxis	-2.30568	-0.897352	C5AR1,IL6,IL6R,PTK2,PTN,S100A7,XCL1,SLAMF1,VEGFA,PLA2G7,TNFSF18,CXCL13,CAMK1D,S100A14,WNK1,MCU,TIRAP	17/96
GO Biological Processes	GO:0071622	regulation of granulocyte chemotaxis	-2.11707	-0.777631	C5AR1,DPP4,PTK2,S100A7,XCL1,SLAMF1,TNFSF18,CAMK1D,S100A14,MCU,TIRAP	11/54
GO Biological Processes	GO:0060322	head development	-7.44516	-4.57895	ASPH,ATP1A2,ATP1B2,ATP5PB,BMP2,BMP4,BMP5,BNIP3,CDC42,CDK6,CHRNB2,CMA1,CNTN1,COL1A1,COL3A1,CTNS,DAB1,DLX6,DNAH5,EGR2,ELAVL4,EXT1,FGF10,FOXG1,GBA1,GBX2,GLI1,GLUD1,GRIN2D,HMX2,INHBA,KCNA1,KCNA2,LAMB1,LMX1A,NHLH2,NODAL,NRCAM,NTRK2,PBX1,PDGFRA,PITX3,MED1,PRKDC,SCT,SELENOP,SLIT1,SOX9,SOX15,NR2E1,TNR,TP53,LRP8,FZD1,FZD6,PSMG1,SEMA5A,TBX19,INA,DLG5,AIM2,SEMA3E,TOX,MAFB,SEMA3A,TACC2,NRG3,NES,FRS2,TUBGCP2,…	118/795
GO Biological Processes	GO:0007420	brain development	-6.60882	-3.96446	ATP1A2,ATP1B2,ATP5PB,BMP2,BMP4,BMP5,BNIP3,CDC42,CDK6,CHRNB2,CMA1,CNTN1,COL3A1,CTNS,DAB1,DNAH5,EGR2,ELAVL4,EXT1,FGF10,FOXG1,GBA1,GBX2,GLI1,GLUD1,GRIN2D,HMX2,INHBA,KCNA1,KCNA2,LAMB1,LMX1A,NHLH2,NODAL,NRCAM,NTRK2,PBX1,PITX3,MED1,PRKDC,SCT,SELENOP,SLIT1,SOX15,NR2E1,TNR,TP53,LRP8,FZD1,FZD6,PSMG1,SEMA5A,TBX19,INA,DLG5,AIM2,SEMA3E,TOX,MAFB,SEMA3A,TACC2,NRG3,NES,FRS2,TUBGCP2,VAX1,KDM1A,NCSTN,NIPBL,NME7,N…	109/745
GO Biological Processes	GO:0030900	forebrain development	-2.92759	-1.30936	ATP1A2,ATP1B2,BMP2,BMP4,BNIP3,CDK6,CHRNB2,COL3A1,DAB1,DNAH5,ELAVL4,EXT1,FGF10,FOXG1,GBX2,GLI1,INHBA,KCNA1,KCNA2,LAMB1,LMX1A,NHLH2,NTRK2,SCT,SLIT1,NR2E1,TNR,LRP8,SEMA5A,TBX19,SEMA3E,TOX,SEMA3A,TACC2,NRG3,FRS2,KDM1A,AKIRIN2,CHD7,BCAN,NEUROD6,BCL11B,SECISBP2,TRAPPC9,ZDHHC16,DOCK7,FOXP2,LRRK2,NKX2-6,GDF7,VPS13B,GSX1,MDGA1,NOTCH2NLA,LHX8,SRGAP2C	56/412
GO Biological Processes	GO:0021537	telencephalon development	-2.39987	-0.971408	ATP1A2,ATP1B2,BMP2,BMP4,BNIP3,CDK6,COL3A1,DAB1,DNAH5,EXT1,FOXG1,INHBA,KCNA1,KCNA2,LAMB1,LMX1A,NTRK2,SCT,NR2E1,TNR,LRP8,SEMA3A,TACC2,NRG3,KDM1A,AKIRIN2,CHD7,BCAN,NEUROD6,BCL11B,SECISBP2,TRAPPC9,ZDHHC16,FOXP2,LRRK2,VPS13B,MDGA1,NOTCH2NLA,SRGAP2C	39/280
WikiPathways	WP5224	2q37 copy number variation syndrome	-7.33826	-4.50811	BOK,DTYMK,GBX2,HDLBP,PDX1,JUN,MEF2A,NEDD8,PDCD1,TP53,PER2,CYTH1,FARP2,RAMP1,STK25,PASK,ATG4B,SNED1,ANO7,THAP4,ANKMY1,ASB1,UGT1A8,UGT1A4,GAL3ST2,RAB17,ING5,AGAP1,NEU4,RTP5,MROH2A,ESPNL,DNAJB3,MAP1LC3C,D2HGDH	35/145
GO Biological Processes	GO:0051715	cytolysis in another organism	-7.33292	-4.50811	GBP1,GBP2,GBP3,CCL28,RNASE7,GBP5,GBP7	7/7
GO Biological Processes	GO:0019835	cytolysis	-5.35985	-3.02936	GBP1,GBP2,GBP3,CCL28,RNASE7,GBP5,GBP7	7/10
GO Biological Processes	GO:0140639	positive regulation of pyroptotic inflammatory response	-2.74188	-1.18388	GBP1,GBP2,GBP3,GBP5	4/7
GO Biological Processes	GO:0140971	regulation of AIM2 inflammasome complex assembly	-2.2021	-0.836951	GBP2,IFI16,GBP5	3/5
GO Biological Processes	GO:0045165	cell fate commitment	-7.26598	-4.45413	JAG1,BMP2,BMP4,RUNX2,CDC42,CTSL,ETS2,EXT1,EYA1,FGF10,FOXG1,GATA4,FOXA1,HOXA11,HOXA13,IL6,IL6R,IL7,JAK1,KDR,LY9,MCL1,NFIA,NODAL,NOTCH2,PRRX1,PRKDC,SOX5,SOX9,TBXT,TBX15,NR2E1,TP53,WNT8B,LMO4,TBX19,ARHGEF2,TOX,SPRY2,SOSTDC1,LATS2,WNT16,SUFU,SLAMF8,BCL11B,ZDHHC16,DOCK7,SLAMF6,GDF7,GSX1,ATOH7	51/257
GO Biological Processes	GO:0048663	neuron fate commitment	-2.41644	-0.986102	BMP4,CDC42,EYA1,FOXG1,FOXA1,NFIA,PRRX1,SOX9,LMO4,SUFU,BCL11B,ZDHHC16,GSX1,ATOH7	14/71
