# Supplementary material for: Identification and validation of the important role of YAP in the development and progression of Osteosarcoma
Source: Research Square preprint supplement (doi:10.21203/rs.3.rs-6614090/v1), 2025-07-08
Supplement: Supplementary file 2 [file 72803bfdfe7acb93e5cb9b8a.xlsx]

## Sheet: Table 4
Table 4. List of all interactions between Hippo pathway genes and drugs from DGI
Gene	Source Database	Interaction Type	Interaction Score	Drug Claim Name	Drug Name	Drug Concept ID	Approved	Immunotherapy	Anti-Neoplastic
DVL1	GuideToPharmacology	inhibitor	52.5077	IUPHAR.LIGAND:8770	ILLUDALIC ACID	iuphar.ligand:8770	FALSE	FALSE	FALSE
AXIN1	DTC	NULL	52.5077	(+/-)-HYDNOCARPIN	CHEMBL:CHEMBL91638	chembl:CHEMBL91638	FALSE	FALSE	FALSE
BMP2	DTC	NULL	26.2538	ISOPROPYL 4-AMINOBENZOATE	CHEMBL:CHEMBL1467165	chembl:CHEMBL1467165	FALSE	FALSE	FALSE
BMP2	DTC	NULL	26.2538	METHYL 4-AMINOBENZOATE	CHEMBL:CHEMBL1927048	chembl:CHEMBL1927048	FALSE	FALSE	FALSE
BMP2	DTC	NULL	26.2538	BUTYL 4-ACETAMIDOBENZOATE	CHEMBL:CHEMBL1321401	chembl:CHEMBL1321401	FALSE	FALSE	FALSE
FZD1	DTC	NULL	26.2538	GNF-PF-3411	CHEMBL:CHEMBL593726	chembl:CHEMBL593726	FALSE	FALSE	FALSE
FZD1	DTC	NULL	26.2538	TCMDC-124051	CHEMBL:CHEMBL464249	chembl:CHEMBL464249	FALSE	FALSE	FALSE
FZD4	GuideToPharmacology	modulator	26.2538	IUPHAR.LIGAND:10322	FZM1	iuphar.ligand:10322	FALSE	FALSE	FALSE
FZD4	GuideToPharmacology	modulator	26.2538	IUPHAR.LIGAND:10321	FZM1.8	iuphar.ligand:10321	FALSE	FALSE	FALSE
FZD8	ChEMBL	inhibitor	26.2538	IPAFRICEPT	IPAFRICEPT	ncit:C102565	FALSE	FALSE	FALSE
PPP2CA	ChEMBL	inhibitor	21.0031	LB-100	LB-100	drugbank:DB15412	FALSE	FALSE	FALSE
TGFB2	ChEMBL	inhibitor	15.0022	LERDELIMUMAB	LERDELIMUMAB	ncit:C170107	FALSE	FALSE	FALSE
TGFB2	TdgClinicalTrial	NULL	15.0022	BELAGENPUMATUCEL-L	BELAGENPUMATUCEL-L	ncit:C73438	FALSE	FALSE	TRUE
TGFB2	TdgClinicalTrial	NULL	15.0022	LERDELIMUMAB	LERDELIMUMAB	ncit:C170107	FALSE	FALSE	FALSE
TGFB2	TALC	vaccine	15.0022	BELAGENPUMATUCEL-L	BELAGENPUMATUCEL-L	ncit:C73438	FALSE	FALSE	TRUE
CDH1	TALC	NULL	13.1269	COMBRETASTATIN-A4 PHOSPHATE	FOSBRETABULIN TROMETHAMINE	chembl:CHEMBL2105643	FALSE	FALSE	TRUE
TEAD4	GuideToPharmacology	inhibitor	13.1269	IUPHAR.LIGAND:12814	GNE-7883	iuphar.ligand:12814	FALSE	FALSE	FALSE
SMAD2	DTC	NULL	13.1269	GERANIIN	GERANIIN	chembl:CHEMBL506069	FALSE	FALSE	FALSE
BMPR2	GuideToPharmacology	agonist	13.1269	IUPHAR.LIGAND:12435	L-PHE-PHE-PHE	iuphar.ligand:12435	FALSE	FALSE	FALSE
FZD6	GuideToPharmacology	agonist	13.1269	IUPHAR.LIGAND:10327	SAG1.3	iuphar.ligand:10327	FALSE	FALSE	FALSE
FZD6	GuideToPharmacology	agonist	13.1269	IUPHAR.LIGAND:3547	WNT-4	iuphar.ligand:3547	FALSE	FALSE	FALSE
FZD6	GuideToPharmacology	agonist	13.1269	IUPHAR.LIGAND:3549	WNT-3A	iuphar.ligand:3549	FALSE	FALSE	FALSE
FZD6	GuideToPharmacology	agonist	13.1269	IUPHAR.LIGAND:3548	WNT-5A	iuphar.ligand:3548	FALSE	FALSE	FALSE
DVL2	GuideToPharmacology	inhibitor	13.1269	IUPHAR.LIGAND:8831	COMPOUND 1 [PMID: 21882820]	iuphar.ligand:8831	FALSE	FALSE	FALSE
AMOT	DTC	NULL	11.6684	ROXITHROMYCIN	ROXITHROMYCIN	rxcui:9478	FALSE	FALSE	FALSE
PPP2CB	ChEMBL	inhibitor	10.5015	LB-100	LB-100	drugbank:DB15412	FALSE	FALSE	FALSE
FZD7	GuideToPharmacology	inhibitor	10.5015	IUPHAR.LIGAND:10324	FZ7-21	iuphar.ligand:10324	FALSE	FALSE	FALSE
FZD7	GuideToPharmacology	inhibitor	10.5015	IUPHAR.LIGAND:12916	F7H	iuphar.ligand:12916	FALSE	FALSE	FALSE
FZD7	GuideToPharmacology	inhibitor	10.5015	IUPHAR.LIGAND:10323	SRI37892	iuphar.ligand:10323	FALSE	FALSE	FALSE
CCND3	GuideToPharmacology	inhibitor	10.5015	IUPHAR.LIGAND:9347	KYT-0353	iuphar.ligand:9347	FALSE	FALSE	FALSE
FZD2	GuideToPharmacology	inhibitor	8.75128	IUPHAR.LIGAND:8797	COMPOUND 13 [PMID: 17502136]	iuphar.ligand:8797	FALSE	FALSE	FALSE
DLG2	PharmGKB	NULL	8.0781	anastrozole	ANASTROZOLE	rxcui:84857	TRUE	FALSE	TRUE
TGFB2	TdgClinicalTrial	NULL	7.5011	TRABEDERSEN	TRABEDERSEN	ncit:C80066	FALSE	FALSE	FALSE
FZD5	ChEMBL	inhibitor	7.5011	VANTICTUMAB	VANTICTUMAB	ncit:C96799	FALSE	FALSE	FALSE
CDH1	NCI	NULL	6.56346	PROTEOLYTIC ENZYMES	PANCREATIC PROTEOLYTIC ENZYMES	ncit:C38728	FALSE	FALSE	FALSE
BMPR2	GuideToPharmacology	agonist	6.56346	IUPHAR.LIGAND:12422	COHUMULONE	iuphar.ligand:12422	FALSE	FALSE	FALSE
TGFBR2	DTC	NULL	5.83419	HESPERETIN	HESPERETIN	rxcui:1314255	TRUE	FALSE	FALSE
CSNK1E	DTC	inhibitor	5.25077	HTS-466284	4-(3-PYRIDIN-2-YL-1H-PYRAZOL-4-YL)QUINOLINE	drugbank:DB03921	FALSE	FALSE	FALSE
PPP1CA	GuideToPharmacology	inhibitor	5.25077	IUPHAR.LIGAND:4735	MICROCYSTIN-LR	iuphar.ligand:4735	FALSE	FALSE	FALSE
PPP1CA	DTC	NULL	5.25077	DEMETHYL-CANTHARIDIN	DEMETHYL-CANTHARIDIN	chembl:CHEMBL8327	FALSE	FALSE	FALSE
SMAD4	CIViC	NULL	5.25077	LYSINE	LYSINE	rxcui:6536	TRUE	FALSE	TRUE
TGFBR1	ChEMBL	inhibitor	5.00073	VACTOSERTIB	VACTOSERTIB	ncit:C116357	FALSE	FALSE	FALSE
CSNK1E	PharmGKB	NULL	4.92259	heroin	HEROIN	rxcui:3304	FALSE	FALSE	FALSE
CSNK1E	ChEMBL	inhibitor	4.37564	UMBRALISIB TOSYLATE	UMBRALISIB TOSYLATE	rxcui:2478438	TRUE	FALSE	FALSE
TGFB3	ChEMBL	inhibitor	4.37564	FRESOLIMUMAB	FRESOLIMUMAB	ncit:C63546	FALSE	FALSE	FALSE
SMAD2	DTC	NULL	4.37564	BISDEMETHOXYCURCUMIN	BISDEMETHOXYCURCUMIN	chembl:CHEMBL105350	FALSE	FALSE	FALSE
BMP2	DTC	NULL	4.37564	BUTAMBEN	BUTAMBEN	rxcui:19861	TRUE	FALSE	FALSE
CCN2	TdgClinicalTrial	NULL	4.03905	FG-3019	PAMREVLUMAB	ncit:C92577	FALSE	FALSE	FALSE
CCN2	ChEMBL	inhibitor	4.03905	PAMREVLUMAB	PAMREVLUMAB	ncit:C92577	FALSE	FALSE	FALSE
CCN2	NCI	NULL	4.03905	ACRIDINE	ACRIDINE	ncit:C203	FALSE	FALSE	FALSE
CTNNA1	GuideToPharmacology	inhibitor	4.03905	IUPHAR.LIGAND:9973	COMPOUND 27 [PMID: 29775310]	iuphar.ligand:9973	FALSE	FALSE	FALSE
CTNNA1	GuideToPharmacology	inhibitor	4.03905	IUPHAR.LIGAND:11674	TIZATERKIB	iuphar.ligand:11674	FALSE	FALSE	FALSE
CTNNA1	GuideToPharmacology	inhibitor	4.03905	IUPHAR.LIGAND:5968	ERK INHIBITOR III	iuphar.ligand:5968	FALSE	FALSE	FALSE
CTNNA1	GuideToPharmacology	inhibitor	4.03905	IUPHAR.LIGAND:11411	EDAXETERKIB	iuphar.ligand:11411	FALSE	FALSE	FALSE
FZD2	ChEMBL	inhibitor	3.75055	VANTICTUMAB	VANTICTUMAB	ncit:C96799	FALSE	FALSE	FALSE
FZD8	ChEMBL	inhibitor	3.75055	VANTICTUMAB	VANTICTUMAB	ncit:C96799	FALSE	FALSE	FALSE
CTNNA2	GuideToPharmacology	inhibitor	3.75055	IUPHAR.LIGAND:10703	HALICIN	drugbank:DB15624	FALSE	FALSE	FALSE
PPP1CA	GuideToPharmacology	inhibitor	3.50051	IUPHAR.LIGAND:5349	OKADAIC ACID	iuphar.ligand:5349	FALSE	FALSE	FALSE
TGFB3	ChEMBL	inhibitor	3.28173	LUSPATERCEPT	LUSPATERCEPT-AAMT	rxcui:2262543	TRUE	FALSE	FALSE
WNT7A	NCI	NULL	3.18228	DES	DIETHYLSTILBESTROL	rxcui:3390	TRUE	FALSE	FALSE
SERPINE1	ChEMBL	inhibitor	3.08869	ALEPLASININ	ALEPLASININ	ncit:C76071	FALSE	FALSE	FALSE
SERPINE1	NCI	NULL	3.08869	THROMBOLYTIC AGENT	THROMBOLYTIC AGENT	ncit:C29750	FALSE	FALSE	FALSE
SERPINE1	DTC	NULL	3.08869	TIPLASININ	TIPLASININ	ncit:C77020	FALSE	FALSE	FALSE
AMH	GuideToPharmacology	agonist	3.08869	IUPHAR.LIGAND:6159	12-HYDROXYHEPTADECATRIENOIC ACID	iuphar.ligand:6159	FALSE	FALSE	FALSE
AMH	GuideToPharmacology	agonist	3.08869	IUPHAR.LIGAND:6160	12-EPI LTB4	iuphar.ligand:6160	FALSE	FALSE	FALSE
AMH	GuideToPharmacology	agonist	3.08869	IUPHAR.LIGAND:3401	15S-HETE	iuphar.ligand:3401	FALSE	FALSE	FALSE
AMH	GuideToPharmacology	agonist	3.08869	IUPHAR.LIGAND:6161	CAY10583	iuphar.ligand:6161	FALSE	FALSE	FALSE
AMH	GuideToPharmacology	agonist	3.08869	IUPHAR.LIGAND:3404	12S-HETE	iuphar.ligand:3404	FALSE	FALSE	FALSE
AMH	GuideToPharmacology	inhibitor	3.08869	IUPHAR.LIGAND:6162	ZK-158252	iuphar.ligand:6162	FALSE	FALSE	FALSE
FZD7	ChEMBL	inhibitor	3.00044	VANTICTUMAB	VANTICTUMAB	ncit:C96799	FALSE	FALSE	FALSE
TGFBR1	DTC	inhibitor	3.00044	HTS-466284	4-(3-PYRIDIN-2-YL-1H-PYRAZOL-4-YL)QUINOLINE	drugbank:DB03921	FALSE	FALSE	FALSE
BMP5	PharmGKB	NULL	3.00044	escitalopram	CITALOPRAM	rxcui:2556	TRUE	FALSE	FALSE
LATS2	GuideToPharmacology	inhibitor	2.91709	IUPHAR.LIGAND:12663	TRULI	iuphar.ligand:12663	FALSE	FALSE	FALSE
ITGB2	NCI	NULL	2.91709	RECOMBINANT C5A	RECOMBINANT C5A	ncit:C388	FALSE	FALSE	FALSE
FGF1	ChEMBL	agonist	2.91709	FAZPILODEMAB	FAZPILODEMAB	ncit:C188644	FALSE	FALSE	FALSE
FGF1	GuideToPharmacology	inhibitor	2.91709	IUPHAR.LIGAND:8193	COMPOUND 30 [PMID: 17280833]	iuphar.ligand:8193	FALSE	FALSE	FALSE
TGFB3	ChEMBL	binder	2.62538	BINTRAFUSP ALFA	BINTRAFUSP ALFA	ncit:C124229	FALSE	FALSE	FALSE
SMAD2	NCI	NULL	2.62538	AMIFOSTINE	AMIFOSTINE ANHYDROUS	rxcui:1545987	TRUE	FALSE	FALSE
BMPR2	GuideToPharmacology	agonist	2.62538	IUPHAR.LIGAND:12424	L-TRP-TRP-TRP	iuphar.ligand:12424	FALSE	FALSE	FALSE
BIRC2	GuideToPharmacology	agonist	2.62538	IUPHAR.LIGAND:1774	[33P]2MESADP	iuphar.ligand:1774	FALSE	FALSE	FALSE
BIRC2	GuideToPharmacology	inhibitor	2.62538	IUPHAR.LIGAND:1777	MRS2211	iuphar.ligand:1777	FALSE	FALSE	FALSE
BIRC2	GuideToPharmacology	inhibitor	2.62538	IUPHAR.LIGAND:1778	MRS2603	iuphar.ligand:1778	FALSE	FALSE	FALSE
TGFB2	ChEMBL	inhibitor	2.50037	FRESOLIMUMAB	FRESOLIMUMAB	ncit:C63546	FALSE	FALSE	FALSE
TGFBR1	ChEMBL	inhibitor	2.50037	GALUNISERTIB	GALUNISERTIB	ncit:C116891	FALSE	FALSE	FALSE
BIRC3	GuideToPharmacology	inhibitor	2.50037	IUPHAR.LIGAND:9470	MRS4174	iuphar.ligand:9470	FALSE	FALSE	FALSE
BIRC3	GuideToPharmacology	agonist	2.50037	IUPHAR.LIGAND:1784	UDP-GLUCURONIC ACID	iuphar.ligand:1784	FALSE	FALSE	FALSE
BIRC3	GuideToPharmacology	agonist	2.50037	IUPHAR.LIGAND:9471	MRS4183	iuphar.ligand:9471	FALSE	FALSE	FALSE
BIRC3	GuideToPharmacology	inhibitor	2.50037	IUPHAR.LIGAND:11453	MRS4625	iuphar.ligand:11453	FALSE	FALSE	FALSE
BIRC3	GuideToPharmacology	agonist	2.50037	IUPHAR.LIGAND:3337	MRS2690	iuphar.ligand:3337	FALSE	FALSE	FALSE
BIRC3	GuideToPharmacology	agonist	2.50037	IUPHAR.LIGAND:5909	MRS2802	iuphar.ligand:5909	FALSE	FALSE	FALSE
BIRC3	GuideToPharmacology	inhibitor	2.50037	IUPHAR.LIGAND:5802	PPTN	iuphar.ligand:5802	FALSE	FALSE	FALSE
BIRC3	GuideToPharmacology	inhibitor	2.50037	IUPHAR.LIGAND:9999	MRS4478	iuphar.ligand:9999	FALSE	FALSE	FALSE
BIRC3	GuideToPharmacology	agonist	2.50037	IUPHAR.LIGAND:5908	MRS2905	iuphar.ligand:5908	FALSE	FALSE	FALSE
BIRC3	GuideToPharmacology	agonist	2.50037	IUPHAR.LIGAND:6203	&ALPHA;.&BETA;-METHYLENE-2-THIO-UDP	iuphar.ligand:6203	FALSE	FALSE	FALSE
BIRC3	GuideToPharmacology	agonist	2.50037	IUPHAR.LIGAND:1779	UDP N-ACETYL-GLUCOSAMINE	iuphar.ligand:1779	FALSE	FALSE	FALSE
BIRC3	GuideToPharmacology	inhibitor	2.50037	IUPHAR.LIGAND:9998	MRS4458	iuphar.ligand:9998	FALSE	FALSE	FALSE
BIRC3	GuideToPharmacology	agonist	2.50037	IUPHAR.LIGAND:6202	2-THIO-UDP	iuphar.ligand:6202	FALSE	FALSE	FALSE
CSNK1D	GuideToPharmacology	inhibitor	2.38671	IUPHAR.LIGAND:8844	COMPOUND 5 [NOBLE ET AL., 1992]	iuphar.ligand:8844	FALSE	FALSE	FALSE
ITGB2	NCI	NULL	2.38671	LAK CELL	LYMPHOKINE-ACTIVATED KILLER CELLS	ncit:C13008	FALSE	FALSE	FALSE
ITGB2	NCI	NULL	2.38671	LAK CELLS	LYMPHOKINE-ACTIVATED KILLER CELLS	ncit:C13008	FALSE	FALSE	FALSE
ITGB2	NCI	NULL	2.38671	LAK	LYMPHOKINE-ACTIVATED KILLER CELLS	ncit:C13008	FALSE	FALSE	FALSE
CTNNB1	TTD	NULL	2.38671	CEQ-508	CEQ508	drugbank:DB17911	FALSE	FALSE	FALSE
CTNNB1	TdgClinicalTrial	NULL	2.38671	CEQ508	CEQ508	drugbank:DB17911	FALSE	FALSE	FALSE
APC	JAX-CKB	NULL	2.38671	ICG-001	ICG-001	drugbank:DB18024	FALSE	FALSE	FALSE
FGF1	TdgClinicalTrial	NULL	2.33367	PENTOSAN POLYSULFATE	PENTOSAN POLYSULFATE	rxcui:155046	TRUE	FALSE	FALSE
FGF1	TEND	NULL	2.33367	PENTOSAN POLYSULFATE	PENTOSAN POLYSULFATE	rxcui:155046	TRUE	FALSE	FALSE
GSK3B	DTC	NULL	2.28294	MANZAMINE A	MANZAMINE A	chembl:CHEMBL403233	FALSE	FALSE	FALSE
GSK3B	DTC	NULL	2.28294	BETA-SITOSTEROL	BETA-SITOSTEROL	ncit:C63662	FALSE	FALSE	FALSE
GSK3B	DTC	NULL	2.28294	PALINURIN	PALINURIN	chembl:CHEMBL464381	FALSE	FALSE	FALSE
GSK3B	DTC	NULL	2.28294	PALBINONE	PALBINONE	chembl:CHEMBL575924	FALSE	FALSE	FALSE
GSK3B	DTC	NULL	2.28294	KRM-189	CHEMBL:CHEMBL449063	chembl:CHEMBL449063	FALSE	FALSE	FALSE
GSK3B	DTC	NULL	2.28294	30-NORHEDERAGENIN	CHEMBL:CHEMBL1081326	chembl:CHEMBL1081326	FALSE	FALSE	FALSE
GSK3B	DTC	NULL	2.28294	DAUCOSTEROL	SITOGLUSIDE	chembl:CHEMBL506678	FALSE	FALSE	FALSE
SMAD7	PharmGKB	NULL	2.18782	tegafur	URACIL	rxcui:10995	TRUE	FALSE	TRUE
SMAD2	DTC	NULL	2.18782	DEMETHOXYCURCUMIN	DEMETHOXYCURCUMIN	chembl:CHEMBL179512	FALSE	FALSE	FALSE
FZD7	GuideToPharmacology	antibody	2.10031	IUPHAR.LIGAND:10197	VANTICTUMAB	iuphar.ligand:10197	FALSE	FALSE	FALSE
AFP	GuideToPharmacology	agonist	2.01953	IUPHAR.LIGAND:3638	PHOSPHATIDYLSERINE	rxcui:89959	FALSE	FALSE	FALSE
AFP	TTD	NULL	2.01953	MM-093	MM-093	drugbank:DB05512	FALSE	FALSE	FALSE
AFP	ChEMBL	binder	2.01953	YTTRIUM Y 90 TACATUZUMAB TETRAXETAN	YTTRIUM Y 90 TACATUZUMAB TETRAXETAN	chembl:CHEMBL2108669	FALSE	FALSE	FALSE
CTNNA1	GuideToPharmacology	inhibitor	2.01953	IUPHAR.LIGAND:5966	5-(2-PHENYLPYRAZOLO[1,5-A]PYRIDIN-3-YL)-1H-PYRAZOLO[3,4-C]PYRIDAZIN-3-AMINE	drugbank:DB07794	FALSE	FALSE	FALSE
CTNNA3	PharmGKB	NULL	2.01953	antidepressants	ANTIDEPRESSANT AGENT	ncit:C265	FALSE	FALSE	FALSE
YWHAE	NCI	NULL	1.98142	INSULIN	INSULIN, REGULAR, HUMAN	rxcui:253182	TRUE	FALSE	FALSE
LATS2	GuideToPharmacology	inhibitor	1.94473	IUPHAR.LIGAND:5655	A-674563	iuphar.ligand:5655	FALSE	FALSE	FALSE
FGF1	ChEMBL	agonist	1.94473	PEGBELFERMIN	PEGBELFERMIN	ncit:C174833	FALSE	FALSE	FALSE
FGF1	ChEMBL	activator	1.94473	ALDAFERMIN	ALDAFERMIN	ncit:C169769	FALSE	FALSE	FALSE
TGFB2	ChEMBL	inhibitor	1.87527	LUSPATERCEPT	LUSPATERCEPT-AAMT	rxcui:2262543	TRUE	FALSE	FALSE
FZD1	ChEMBL	inhibitor	1.87527	VANTICTUMAB	VANTICTUMAB	ncit:C96799	FALSE	FALSE	FALSE
BIRC2	TALC	inhibitor	1.87527	AT-406	XEVINAPANT	drugbank:DB16305	FALSE	FALSE	TRUE
BIRC2	DTC	NULL	1.87527	AT-406	XEVINAPANT	drugbank:DB16305	FALSE	FALSE	TRUE
CTNNA2	GuideToPharmacology	inhibitor	1.87527	IUPHAR.LIGAND:8842	COMPOUND 35 [PMID: 23916259]	iuphar.ligand:8842	FALSE	FALSE	FALSE
CTNNA2	GuideToPharmacology	inhibitor	1.87527	IUPHAR.LIGAND:9377	JNK INHIBITOR 9L	iuphar.ligand:9377	FALSE	FALSE	FALSE
CTNNA2	GuideToPharmacology	inhibitor	1.87527	IUPHAR.LIGAND:12484	YL5084	iuphar.ligand:12484	FALSE	FALSE	FALSE
YAP1	PharmGKB	NULL	1.77992	etoposide	ETOPOSIDE	rxcui:4179	TRUE	FALSE	TRUE
TGFB1	NCI	NULL	1.77992	IUDR	IDOXURIDINE	rxcui:5653	TRUE	FALSE	FALSE
BIRC2	DTC	NULL	1.75026	BESTATIN METHYL ESTER	BESTATIN METHYL ESTER	chembl:CHEMBL457092	FALSE	FALSE	FALSE
BIRC3	DTC	NULL	1.66691	BESTATIN METHYL ESTER	BESTATIN METHYL ESTER	chembl:CHEMBL457092	FALSE	FALSE	FALSE
CTNNB1	DTC	NULL	1.59114	SODIUM 2-PHENOXYBENZOATE	CHEMBL:CHEMBL2172378	chembl:CHEMBL2172378	FALSE	FALSE	FALSE
CTNNB1	DTC	NULL	1.59114	EOSIN_Y	EOSIN_Y	chembl:CHEMBL1092023	FALSE	FALSE	FALSE
CTNNB1	DTC	NULL	1.59114	FLUORESCEIN SODIUM	FLUORESCEIN SODIUM	rxcui:57789	TRUE	FALSE	FALSE
AMH	GuideToPharmacology	agonist	1.54434	IUPHAR.LIGAND:6155	CP-195543	iuphar.ligand:6155	FALSE	FALSE	FALSE
AMH	GuideToPharmacology	inhibitor	1.54434	IUPHAR.LIGAND:6155	CP-195543	iuphar.ligand:6155	FALSE	FALSE	FALSE
AMH	GuideToPharmacology	NULL	1.54434	IUPHAR.LIGAND:3413	[3H]LTB4	iuphar.ligand:3413	FALSE	FALSE	FALSE
AMH	GuideToPharmacology	inhibitor	1.54434	IUPHAR.LIGAND:3351	LY255283	iuphar.ligand:3351	FALSE	FALSE	FALSE
TCF7L2	PharmGKB	NULL	1.50022	repaglinide	REPAGLINIDE	rxcui:73044	TRUE	FALSE	FALSE
TGFB2	ChEMBL	binder	1.50022	BINTRAFUSP ALFA	BINTRAFUSP ALFA	ncit:C124229	FALSE	FALSE	FALSE
MYC	NCI	NULL	1.50022	AMINOPTERIN	AMINOPTERIN	rxcui:1440264	FALSE	FALSE	FALSE
MYC	NCI	NULL	1.50022	ADOZELESIN	ADOZELESIN	ncit:C1270	FALSE	FALSE	FALSE
MYC	NCI	NULL	1.50022	LOBAPLATIN	LOBAPLATIN	ncit:C1434	FALSE	FALSE	FALSE
MYC	NCI	NULL	1.50022	MGBG	MITOGUAZONE	ncit:C661	FALSE	FALSE	FALSE
MYC	NCI	NULL	1.50022	BIZELESIN	BIZELESIN	ncit:C1472	FALSE	FALSE	FALSE
MYC	NCI	NULL	1.50022	ORNITHINE DECARBOXYLASE INHIBITOR	ORNITHINE DECARBOXYLASE INHIBITOR	ncit:C2088	FALSE	FALSE	FALSE
MYC	NCI	NULL	1.50022	MACROPHAGE COLONY STIMULATING FACTOR	RECOMBINANT MACROPHAGE COLONY-STIMULATING FACTOR	ncit:C1290	FALSE	FALSE	FALSE
MYC	NCI	NULL	1.50022	COBALT 60	COBALT CO-60	ncit:C28239	FALSE	FALSE	FALSE
MYC	NCI	NULL	1.50022	AN-9	AN-9	drugbank:DB05103	FALSE	FALSE	FALSE
ACTB	GuideToPharmacology	inhibitor	1.50022	IUPHAR.LIGAND:3492	BMS COMPOUND 87B	iuphar.ligand:3492	FALSE	FALSE	FALSE
ACTB	GuideToPharmacology	inhibitor	1.50022	IUPHAR.LIGAND:10653	LAZUCIRNON	ncit:C175807	FALSE	FALSE	FALSE
ACTB	GuideToPharmacology	inhibitor	1.50022	IUPHAR.LIGAND:788	MET-CK&BETA;7	iuphar.ligand:788	FALSE	FALSE	FALSE
ACTB	NCI	NULL	1.50022	ENVIRONMENTAL ESTROGEN	ENVIRONMENTAL ESTROGEN	ncit:C1894	FALSE	FALSE	FALSE
ACTB	GuideToPharmacology	inhibitor	1.50022	IUPHAR.LIGAND:3530	SB328437	iuphar.ligand:3530	FALSE	FALSE	FALSE
ACTB	GuideToPharmacology	inhibitor	1.50022	IUPHAR.LIGAND:791	RO320-2947/001	iuphar.ligand:791	FALSE	FALSE	FALSE
ACTB	GuideToPharmacology	inhibitor	1.50022	IUPHAR.LIGAND:792	RO330-0802/001	iuphar.ligand:792	FALSE	FALSE	FALSE
ACTB	GuideToPharmacology	inhibitor	1.50022	IUPHAR.LIGAND:795	[3H]BANYU (I)	iuphar.ligand:795	FALSE	FALSE	FALSE
ACTB	GuideToPharmacology	inhibitor	1.50022	IUPHAR.LIGAND:9680	GW766994	iuphar.ligand:9680	FALSE	FALSE	FALSE
ACTB	GuideToPharmacology	inhibitor	1.50022	IUPHAR.LIGAND:790	RO116-9132/238	iuphar.ligand:790	FALSE	FALSE	FALSE
ACTB	GuideToPharmacology	inhibitor	1.50022	IUPHAR.LIGAND:794	[125I]CCL11 (HUMAN)	iuphar.ligand:794	FALSE	FALSE	FALSE
ACTB	GuideToPharmacology	agonist	1.50022	IUPHAR.LIGAND:787	CCL11	iuphar.ligand:787	FALSE	FALSE	FALSE
ACTB	GuideToPharmacology	inhibitor	1.50022	IUPHAR.LIGAND:796	[3H]BANYU (I)	iuphar.ligand:795	FALSE	FALSE	FALSE
ACTB	GuideToPharmacology	inhibitor	1.50022	IUPHAR.LIGAND:789	RO116-4875/608	iuphar.ligand:789	FALSE	FALSE	FALSE
ACTG1	GuideToPharmacology	agonist	1.50022	IUPHAR.LIGAND:846	CXCL12-(1-17)	iuphar.ligand:846	FALSE	FALSE	FALSE
ACTG1	GuideToPharmacology	agonist	1.50022	IUPHAR.LIGAND:8530	CXCL12&GAMMA;	iuphar.ligand:8530	FALSE	FALSE	FALSE
ACTG1	GuideToPharmacology	inhibitor	1.50022	IUPHAR.LIGAND:851	SDF-1, 1-9[P2G] DIMER	iuphar.ligand:851	FALSE	FALSE	FALSE
ACTG1	GuideToPharmacology	inhibitor	1.50022	IUPHAR.LIGAND:853	T140	iuphar.ligand:853	FALSE	FALSE	FALSE
ACTG1	GuideToPharmacology	agonist	1.50022	IUPHAR.LIGAND:8531	CXCL12&DELTA;	iuphar.ligand:8531	FALSE	FALSE	FALSE
ACTG1	GuideToPharmacology	agonist	1.50022	IUPHAR.LIGAND:8533	CXCL12&PHI;	iuphar.ligand:8533	FALSE	FALSE	FALSE
ACTG1	GuideToPharmacology	agonist	1.50022	IUPHAR.LIGAND:3919	X4-HIV-1 GP120	iuphar.ligand:3919	FALSE	FALSE	FALSE
ACTG1	GuideToPharmacology	agonist	1.50022	IUPHAR.LIGAND:848	CXCL12-(1-9) DIMER	iuphar.ligand:848	FALSE	FALSE	FALSE
ACTG1	GuideToPharmacology	agonist	1.50022	IUPHAR.LIGAND:8535	CXCL122 (DIMER)	iuphar.ligand:8535	FALSE	FALSE	FALSE
ACTG1	GuideToPharmacology	agonist	1.50022	IUPHAR.LIGAND:8532	CXCL12&EPSILON;	iuphar.ligand:8532	FALSE	FALSE	FALSE
ACTG1	GuideToPharmacology	agonist	1.50022	IUPHAR.LIGAND:850	[125I]CXCL12&BETA; (HUMAN)	iuphar.ligand:850	FALSE	FALSE	FALSE
ACTG1	GuideToPharmacology	inhibitor	1.50022	IUPHAR.LIGAND:2900	ISOTHIOUREA-1A	iuphar.ligand:2900	FALSE	FALSE	FALSE
ACTG1	GuideToPharmacology	inhibitor	1.50022	IUPHAR.LIGAND:852	T134	iuphar.ligand:852	FALSE	FALSE	FALSE
ACTG1	GuideToPharmacology	agonist	1.50022	IUPHAR.LIGAND:8534	CXCL12H25R (MONOMER)	iuphar.ligand:8534	FALSE	FALSE	FALSE
ACTG1	GuideToPharmacology	agonist	1.50022	IUPHAR.LIGAND:849	[125I]CXCL12&ALPHA; (HUMAN)	iuphar.ligand:849	FALSE	FALSE	FALSE
ACTG1	GuideToPharmacology	inhibitor	1.50022	IUPHAR.LIGAND:854	T22	iuphar.ligand:854	FALSE	FALSE	FALSE
ACTG1	GuideToPharmacology	agonist	1.50022	IUPHAR.LIGAND:847	CXCL12-(1-9)	iuphar.ligand:847	FALSE	FALSE	FALSE
ACTG1	GuideToPharmacology	inhibitor	1.50022	IUPHAR.LIGAND:2899	ISOTHIOUREA-1T	iuphar.ligand:2899	FALSE	FALSE	FALSE
ACTG1	GuideToPharmacology	inhibitor	1.50022	IUPHAR.LIGAND:10146	CXCR4 ANTAGONIST 22	iuphar.ligand:10146	FALSE	FALSE	FALSE
ACTG1	GuideToPharmacology	agonist	1.50022	IUPHAR.LIGAND:845	CXCL12&BETA;	iuphar.ligand:845	FALSE	FALSE	FALSE
ACTG1	GuideToPharmacology	inhibitor	1.50022	IUPHAR.LIGAND:8536	SDF1 P2G	iuphar.ligand:8536	FALSE	FALSE	FALSE
ACTG1	GuideToPharmacology	inhibitor	1.50022	IUPHAR.LIGAND:9701	CX549	iuphar.ligand:9701	FALSE	FALSE	FALSE
LATS2	GuideToPharmacology	inhibitor	1.45855	IUPHAR.LIGAND:8209	COMPOUND 35 [PMID: 20684608]	iuphar.ligand:8209	FALSE	FALSE	FALSE
ITGB2	ChEMBL	negative modulator	1.45855	ERLIZUMAB	ERLIZUMAB	ncit:C169959	FALSE	FALSE	FALSE
ITGB2	NCI	NULL	1.45855	BUTEIN	BUTEIN	ncit:C1028	FALSE	FALSE	FALSE
ITGB2	ChEMBL	inhibitor	1.45855	MLNM-2201	MLNM-2201	chembl:CHEMBL2109332	FALSE	FALSE	FALSE
ITGB2	NCI	NULL	1.45855	MEGAKARYOCYTE GROWTH AND DEVELOPMENT FACTOR	RECOMBINANT HUMAN THROMBOPOIETIN	ncit:C878	FALSE	FALSE	FALSE
ITGB2	ChEMBL	inhibitor	1.45855	MLN-01	MLN-01	chembl:CHEMBL2109496	FALSE	FALSE	FALSE
DVL2	PharmGKB	NULL	1.38178	afatinib	AFATINIB	rxcui:1430438	TRUE	FALSE	TRUE
CCN2	NCI	NULL	1.34635	IL-9	IL-9	iuphar.ligand:5000	FALSE	FALSE	FALSE
AFP	NCI	NULL	1.34635	PEP	POLYESTRADIOL PHOSPHATE	rxcui:34120	TRUE	FALSE	FALSE
AFP	NCI	NULL	1.34635	UFT	TEGAFUR-URACIL	ncit:C9506	FALSE	FALSE	FALSE
CTNNA1	GuideToPharmacology	inhibitor	1.34635	IUPHAR.LIGAND:11200	RINETERKIB	ncit:C126687	FALSE	FALSE	FALSE
AMH	NCI	NULL	1.32372	GONADOTROPINS	THERAPEUTIC GONADOTROPIN	ncit:C527	FALSE	FALSE	FALSE
CDH1	CGI	NULL	1.31269	Bicalutamide	BICALUTAMIDE	rxcui:83008	TRUE	FALSE	TRUE
SMAD7	NCI	NULL	1.31269	TPA	ALTEPLASE	rxcui:8410	TRUE	FALSE	FALSE
BIRC2	ChEMBL	inhibitor	1.31269	BIRINAPANT	BIRINAPANT	ncit:C88295	FALSE	FALSE	TRUE
BIRC2	GuideToPharmacology	inhibitor	1.31269	IUPHAR.LIGAND:1764	2MESAMP	iuphar.ligand:1764	FALSE	FALSE	FALSE
BIRC2	ClearityFoundationClinicalTrial	inhibitor	1.31269	BIRINAPANT	BIRINAPANT	ncit:C88295	FALSE	FALSE	TRUE
BIRC2	TALC	inhibitor	1.31269	TL 32711	BIRINAPANT	ncit:C88295	FALSE	FALSE	TRUE
CCND1	ChEMBL	inhibitor	1.25018	BRICICLIB	BRICICLIB	ncit:C141431	FALSE	FALSE	FALSE
BIRC3	GuideToPharmacology	agonist	1.25018	IUPHAR.LIGAND:1783	UDP-GLUCOSE	iuphar.ligand:1783	FALSE	FALSE	FALSE
BIRC3	GuideToPharmacology	agonist	1.25018	IUPHAR.LIGAND:1782	UDP-GALACTOSE	iuphar.ligand:1782	FALSE	FALSE	FALSE
CTNNA2	GuideToPharmacology	inhibitor	1.25018	IUPHAR.LIGAND:8058	JNK-IN-8	iuphar.ligand:8058	FALSE	FALSE	FALSE
TEAD1	NCI	NULL	1.22111	DEXAMETHASONE	DEXAMETHASONE	rxcui:3264	TRUE	FALSE	TRUE
PPP2R2A	PharmGKB	NULL	1.19336	olaparib	OLAPARIB	rxcui:1597582	TRUE	FALSE	TRUE
BIRC5	TALC	inhibitor	1.19336	LY2181308	LY2181308	drugbank:DB05141	FALSE	FALSE	TRUE
BIRC5	NCI	NULL	1.19336	ZD9331	PLEVITREXED	ncit:C1629	FALSE	FALSE	FALSE
BIRC5	TdgClinicalTrial	NULL	1.19336	LY2181308	LY2181308	drugbank:DB05141	FALSE	FALSE	TRUE
APC	GuideToPharmacology	agonist	1.19336	IUPHAR.LIGAND:4043	MRS2768	iuphar.ligand:4043	FALSE	FALSE	FALSE
APC	JAX-CKB	NULL	1.19336	Pyrvinium	PYRVINIUM	rxcui:35163	FALSE	FALSE	FALSE
APC	JAX-CKB	NULL	1.19336	TetMYB	TETMYB DNA VACCINE	ncit:C153094	FALSE	FALSE	FALSE
APC	GuideToPharmacology	inhibitor	1.19336	IUPHAR.LIGAND:9468	PSB-416	iuphar.ligand:9468	FALSE	FALSE	FALSE
APC	GuideToPharmacology	agonist	1.19336	IUPHAR.LIGAND:1735	UTP&GAMMA;S	iuphar.ligand:1735	FALSE	FALSE	FALSE
APC	GuideToPharmacology	agonist	1.19336	IUPHAR.LIGAND:1733	MRS2698	iuphar.ligand:1733	FALSE	FALSE	FALSE
APC	GuideToPharmacology	agonist	1.19336	IUPHAR.LIGAND:1730	4-THIO-UTP	iuphar.ligand:1730	FALSE	FALSE	FALSE
APC	GuideToPharmacology	agonist	1.19336	IUPHAR.LIGAND:3398	2-THIOUTP	iuphar.ligand:3398	FALSE	FALSE	FALSE
APC	GuideToPharmacology	inhibitor	1.19336	IUPHAR.LIGAND:5907	AR-C118925XX	iuphar.ligand:5907	FALSE	FALSE	FALSE
APC	GuideToPharmacology	agonist	1.19336	IUPHAR.LIGAND:5902	PSB1114	iuphar.ligand:5902	FALSE	FALSE	FALSE
APC	GuideToPharmacology	inhibitor	1.19336	IUPHAR.LIGAND:1738	AR-C126313	iuphar.ligand:1738	FALSE	FALSE	FALSE
PPP1CA	DTC	NULL	1.16684	DNDI1417601	CHEMBL:CHEMBL1503729	chembl:CHEMBL1503729	FALSE	FALSE	FALSE
GSK3B	GuideToPharmacology	antibody	1.14147	IUPHAR.LIGAND:9536	RELATLIMAB	iuphar.ligand:9536	FALSE	FALSE	FALSE
BTRC	PharmGKB	NULL	1.1292	gemcitabine	GEMCITABINE	rxcui:12574	TRUE	FALSE	TRUE
BIRC3	TALC	inhibitor	1.07159	AT-406	XEVINAPANT	drugbank:DB16305	FALSE	FALSE	TRUE
SERPINE1	NCI	NULL	1.02956	CETRORELIX	CETRORELIX	rxcui:68147	TRUE	FALSE	FALSE
SERPINE1	NCI	NULL	1.02956	DEFIBROTIDE	DEFIBROTIDE	rxcui:1311089	TRUE	FALSE	FALSE
CTNNA1	GuideToPharmacology	inhibitor	1.00976	IUPHAR.LIGAND:11727	ASTX029	iuphar.ligand:11727	FALSE	FALSE	FALSE
DLG4	NCI	NULL	0.972364	L-DOPA	LEVODOPA	rxcui:6375	TRUE	FALSE	FALSE
DLG5	PharmGKB	NULL	0.972364	capecitabine	CAPECITABINE	rxcui:194000	TRUE	FALSE	TRUE
FZD1	DTC	NULL	0.972364	NICLOSAMIDE	NICLOSAMIDE	rxcui:7402	TRUE	FALSE	FALSE
FZD3	PharmGKB	NULL	0.972364	paclitaxel	PACLITAXEL	rxcui:56946	TRUE	FALSE	TRUE
CSNK1D	DTC	inhibitor	0.954685	HTS-466284	4-(3-PYRIDIN-2-YL-1H-PYRAZOL-4-YL)QUINOLINE	drugbank:DB03921	FALSE	FALSE	FALSE
SMAD4	NCI	NULL	0.954685	TGF	RECOMBINANT TRANSFORMING GROWTH FACTOR	ncit:C899	FALSE	FALSE	FALSE
CTNNA2	GuideToPharmacology	inhibitor	0.937637	IUPHAR.LIGAND:5273	SP600125	iuphar.ligand:5273	FALSE	FALSE	FALSE
TGFB1	NCI	NULL	0.889961	SANDOSTATIN	SANDOSTATIN	chembl:CHEMBL408687	FALSE	FALSE	FALSE
TGFB1	TALC	antibody	0.889961	GC-1008	FRESOLIMUMAB	chembl:CHEMBL1743022	FALSE	FALSE	TRUE
TGFB1	NCI	NULL	0.889961	BOVINE CARTILAGE	BOVINE CARTILAGE	ncit:C2418	FALSE	FALSE	FALSE
WNT5B	PharmGKB	NULL	0.882482	fluorouracil	FLUOROURACIL	rxcui:4492	TRUE	FALSE	TRUE
BIRC2	GuideToPharmacology	agonist	0.875128	IUPHAR.LIGAND:1714	ATP&GAMMA;S	iuphar.ligand:1714	FALSE	FALSE	FALSE
BIRC2	GuideToPharmacology	agonist	0.875128	IUPHAR.LIGAND:1710	2MESADP	iuphar.ligand:1710	FALSE	FALSE	FALSE
BIRC2	GuideToPharmacology	inhibitor	0.875128	IUPHAR.LIGAND:1776	CANGRELOR	rxcui:1656052	TRUE	FALSE	FALSE
BIRC2	GuideToPharmacology	inhibitor	0.875128	IUPHAR.LIGAND:1732	AP4A	iuphar.ligand:1732	FALSE	FALSE	FALSE
TP73	NCI	NULL	0.867895	TAZAROTENE	TAZAROTENE	rxcui:83947	TRUE	FALSE	FALSE
CCND2	NCI	NULL	0.840123	5-AZA-2-DEOXYCYTIDINE	DECITABINE	rxcui:15657	TRUE	FALSE	TRUE
FGF1	GuideToPharmacology	inhibitor	0.833455	IUPHAR.LIGAND:10947	NIK INHIBITOR 12F	iuphar.ligand:10947	FALSE	FALSE	FALSE
TGFBR2	PharmGKB	NULL	0.833455	irinotecan	IRINOTECAN HYDROCHLORIDE	rxcui:153329	TRUE	FALSE	TRUE
BIRC3	GuideToPharmacology	agonist	0.833455	IUPHAR.LIGAND:1749	URIDINE-5'-DIPHOSPHATE	drugbank:DB03435	FALSE	FALSE	FALSE
SMAD2	NCI	NULL	0.820432	BLM	BLEOMYCIN	rxcui:1622	TRUE	FALSE	TRUE
SMAD2	NCI	NULL	0.820432	BLEOMYCIN	BLEOMYCIN	rxcui:1622	TRUE	FALSE	TRUE
BMPR2	GuideToPharmacology	agonist	0.820432	IUPHAR.LIGAND:6953	DEXTROMETHORPHAN POLISTIREX	rxcui:236146	TRUE	FALSE	FALSE
AFP	NCI	NULL	0.80781	POLYETHYLENE GLYCOL	POLYETHYLENE GLYCOL 4000	rxcui:1310594	TRUE	FALSE	FALSE
CTNNA1	GuideToPharmacology	inhibitor	0.80781	IUPHAR.LIGAND:9375	VTX-11E	iuphar.ligand:9375	FALSE	FALSE	FALSE
CTNNA1	GuideToPharmacology	inhibitor	0.80781	IUPHAR.LIGAND:9229	RAVOXERTINIB	ncit:C170364	FALSE	FALSE	FALSE
TP73	NCI	NULL	0.795571	NERVE GROWTH FACTOR	NERVE GROWTH FACTOR	rxcui:7327	FALSE	FALSE	FALSE
YWHAG	DTC	NULL	0.795571	DAUNORUBICIN HYDROCHLORIDE	DAUNORUBICIN HYDROCHLORIDE	rxcui:81992	TRUE	FALSE	FALSE
CTNNB1	JAX-CKB	NULL	0.795571	CWP232291	SAM68 MODULATOR CWP232291	ncit:C97663	FALSE	FALSE	FALSE
CTNNB1	GuideToPharmacology	inhibitor	0.795571	IUPHAR.LIGAND:10524	MW150	iuphar.ligand:10524	FALSE	FALSE	FALSE
CTNNB1	GuideToPharmacology	inhibitor	0.795571	IUPHAR.LIGAND:12846	NDPPC	iuphar.ligand:12846	FALSE	FALSE	FALSE
CTNNB1	CIViC	NULL	0.795571	ANTI-CTLA-4 MONOCLONAL ANTIBODY	ANTI-CTLA-4 MONOCLONAL ANTIBODY	ncit:C128036	FALSE	FALSE	TRUE
CTNNB1	JAX-CKB	NULL	0.795571	Mps1-IN-1	MPS1-IN-1	iuphar.ligand:9271	FALSE	FALSE	FALSE
CTNNB1	GuideToPharmacology	inhibitor	0.795571	IUPHAR.LIGAND:7838	BMS-582949	iuphar.ligand:7838	FALSE	FALSE	FALSE
CTNNB1	JAX-CKB	NULL	0.795571	NMS-P715	NMS-P715	iuphar.ligand:9401	FALSE	FALSE	FALSE
CTNNB1	GuideToPharmacology	inhibitor	0.795571	IUPHAR.LIGAND:8125	COMPOUND 12 [PMID: 22521646]	iuphar.ligand:8125	FALSE	FALSE	FALSE
CTNNB1	TTD	NULL	0.795571	Recombinant human endostatin	RECOMBINANT HUMAN ENDOSTATIN	ncit:C45515	FALSE	FALSE	FALSE
CTNNB1	DTC	NULL	0.795571	(+/-)-HYDNOCARPIN	CHEMBL:CHEMBL91638	chembl:CHEMBL91638	FALSE	FALSE	FALSE
APC	JAX-CKB	NULL	0.795571	STP1002	BASROPARIB	ncit:C174060	FALSE	FALSE	FALSE
AMH	GuideToPharmacology	agonist	0.772172	IUPHAR.LIGAND:2487	LTB4	iuphar.ligand:2487	FALSE	FALSE	FALSE
GSK3B	ChEMBL	inhibitor	0.760981	TIDEGLUSIB	TIDEGLUSIB	ncit:C97364	FALSE	FALSE	FALSE
GSK3B	TdgClinicalTrial	NULL	0.760981	TIDEGLUSIB	TIDEGLUSIB	ncit:C97364	FALSE	FALSE	FALSE
GSK3B	DTC	NULL	0.760981	SR-13668	SR-13668	chembl:CHEMBL245030	FALSE	FALSE	FALSE
CTNNA2	GuideToPharmacology	inhibitor	0.75011	IUPHAR.LIGAND:12334	COMPOUND 25C [PMID: 36649216]	iuphar.ligand:12334	FALSE	FALSE	FALSE
CTNNA2	GuideToPharmacology	inhibitor	0.75011	IUPHAR.LIGAND:9989	COMPOUND 11 [PMID: 26431428]	iuphar.ligand:9989	FALSE	FALSE	FALSE
CDH1	NCI	NULL	0.75011	ANTISERUM	ANTISERUM	ncit:C571	FALSE	FALSE	FALSE
MYC	TdgClinicalTrial	NULL	0.75011	AVI-4126	PHOSPHORODIAMIDATE MORPHOLINO OLIGOMER AVI-4126	ncit:C62518	FALSE	FALSE	FALSE
MYC	NCI	NULL	0.75011	ELSAMICIN A	ELSAMITRUCIN	ncit:C1080	FALSE	FALSE	FALSE
MYC	NCI	NULL	0.75011	PIXY	MILODISTIM	ncit:C1477	FALSE	FALSE	FALSE
ACTB	GuideToPharmacology	agonist	0.75011	IUPHAR.LIGAND:775	CCL24	iuphar.ligand:775	FALSE	FALSE	FALSE
ACTB	GuideToPharmacology	inhibitor	0.75011	IUPHAR.LIGAND:3536	UCB35625	iuphar.ligand:3536	FALSE	FALSE	FALSE
ACTB	GuideToPharmacology	inhibitor	0.75011	IUPHAR.LIGAND:837	CXCL9	iuphar.ligand:837	FALSE	FALSE	FALSE
ACTB	GuideToPharmacology	inhibitor	0.75011	IUPHAR.LIGAND:835	CXCL10	iuphar.ligand:835	FALSE	FALSE	FALSE
ACTB	GuideToPharmacology	inhibitor	0.75011	IUPHAR.LIGAND:4382	CCL18	iuphar.ligand:4382	FALSE	FALSE	FALSE
ACTB	GuideToPharmacology	inhibitor	0.75011	IUPHAR.LIGAND:793	YM-355179	iuphar.ligand:793	FALSE	FALSE	FALSE
ACTB	GuideToPharmacology	agonist	0.75011	IUPHAR.LIGAND:776	CCL26	iuphar.ligand:776	FALSE	FALSE	FALSE
ACTB	GuideToPharmacology	agonist	0.75011	IUPHAR.LIGAND:3649	CCL28	iuphar.ligand:3649	FALSE	FALSE	FALSE
ACTB	GuideToPharmacology	agonist	0.75011	IUPHAR.LIGAND:754	CCL15	iuphar.ligand:754	FALSE	FALSE	FALSE
ACTG1	GuideToPharmacology	inhibitor	0.75011	IUPHAR.LIGAND:8580	MAVORIXAFOR	ncit:C126660	FALSE	FALSE	FALSE
ACTG1	GuideToPharmacology	inhibitor	0.75011	IUPHAR.LIGAND:9882	TIQ-15	iuphar.ligand:9882	FALSE	FALSE	FALSE
ACTG1	GuideToPharmacology	antibody	0.75011	IUPHAR.LIGAND:9161	ULOCUPLUMAB	iuphar.ligand:9161	FALSE	FALSE	FALSE
ACTG1	GuideToPharmacology	inhibitor	0.75011	IUPHAR.LIGAND:11587	BALIXAFORTIDE	ncit:C91094	FALSE	FALSE	FALSE
ACTG1	GuideToPharmacology	inhibitor	0.75011	IUPHAR.LIGAND:9883	COMPOUND 46C [PMID: 29350534]	iuphar.ligand:9883	FALSE	FALSE	FALSE
ACTG1	GuideToPharmacology	agonist	0.75011	IUPHAR.LIGAND:607	ALX40-4C	iuphar.ligand:607	FALSE	FALSE	FALSE
ACTG1	GuideToPharmacology	inhibitor	0.75011	IUPHAR.LIGAND:10679	MOTIXAFORTIDE	rxcui:2664896	TRUE	FALSE	FALSE
TCF7L2	PharmGKB	NULL	0.73695	sirolimus	SIROLIMUS	rxcui:35302	TRUE	TRUE	TRUE
ITGB2	NCI	NULL	0.729273	PROTEOLYTIC ENZYMES	PANCREATIC PROTEOLYTIC ENZYMES	ncit:C38728	FALSE	FALSE	FALSE
ITGB2	NCI	NULL	0.729273	CYCLOOXYGENASE INHIBITOR	CYCLOOXYGENASE INHIBITOR	ncit:C1323	FALSE	FALSE	FALSE
ITGB2	ChEMBL	inhibitor	0.729273	AME-133V	AME-133V	chembl:CHEMBL2109346	FALSE	FALSE	FALSE
ITGB2	TdgClinicalTrial	NULL	0.729273	SAR 1118	LIFITEGRAST	rxcui:1801820	TRUE	FALSE	FALSE
ITGB2	ChEMBL	inhibitor	0.729273	LIFITEGRAST	LIFITEGRAST	rxcui:1801820	TRUE	FALSE	FALSE
ITGB2	NCI	NULL	0.729273	FAS-LIGAND	RECOMBINANT FAS LIGAND	ncit:C1538	FALSE	FALSE	FALSE
CSNK1E	DTC	NULL	0.729273	SB-202190	SB202190	iuphar.ligand:4307	FALSE	FALSE	FALSE
BMP7	PharmGKB	NULL	0.700102	pegaspargase	PEGASPARGASE	rxcui:34132	TRUE	FALSE	FALSE
CSNK1D	DTC	NULL	0.681918	IC261	IC261	drugbank:DB03083	FALSE	FALSE	FALSE
TP73	NCI	NULL	0.681918	VEGF	RECOMBINANT VASCULAR ENDOTHELIAL GROWTH FACTOR	ncit:C1272	FALSE	FALSE	FALSE
CCN2	NCI	NULL	0.673175	RAMIPRIL	RAMIPRIL	rxcui:35296	TRUE	FALSE	FALSE
CTNNA1	GuideToPharmacology	inhibitor	0.673175	IUPHAR.LIGAND:8056	SCH772984	iuphar.ligand:8056	FALSE	FALSE	TRUE
CTNNA1	GuideToPharmacology	inhibitor	0.673175	IUPHAR.LIGAND:9974	MK-8353	iuphar.ligand:9974	FALSE	FALSE	FALSE
BIRC2	GuideToPharmacology	agonist	0.656346	IUPHAR.LIGAND:1755	ADP&BETA;S	iuphar.ligand:1755	FALSE	FALSE	FALSE
BIRC2	GuideToPharmacology	inhibitor	0.656346	IUPHAR.LIGAND:1739	REACTIVE BLUE-2	iuphar.ligand:1739	FALSE	FALSE	FALSE
BIRC2	TdgClinicalTrial	NULL	0.656346	HGS1029	IAP INHIBITOR HGS1029	ncit:C78484	FALSE	FALSE	FALSE
AMH	NCI	NULL	0.633577	TESTOSTERONE	TESTOSTERONE	rxcui:10379	TRUE	FALSE	FALSE
CCND1	GuideToPharmacology	agonist	0.625091	IUPHAR.LIGAND:6742	MRL20	iuphar.ligand:6742	FALSE	FALSE	FALSE
CCND1	GuideToPharmacology	agonist	0.625091	IUPHAR.LIGAND:8700	TIROTUNDIN	iuphar.ligand:8700	FALSE	FALSE	FALSE
CCND1	GuideToPharmacology	NULL	0.625091	IUPHAR.LIGAND:11974	COMPOUND 10 [O'MAHONY ET AL., 2022]	iuphar.ligand:11974	FALSE	FALSE	FALSE
CCND1	GuideToPharmacology	agonist	0.625091	IUPHAR.LIGAND:8701	TAGITININ A	iuphar.ligand:8701	FALSE	FALSE	FALSE
CCND1	GuideToPharmacology	agonist	0.625091	IUPHAR.LIGAND:9888	MDG 548	iuphar.ligand:9888	FALSE	FALSE	FALSE
CCND1	GuideToPharmacology	agonist	0.625091	IUPHAR.LIGAND:2696	L-764406	iuphar.ligand:2696	FALSE	FALSE	FALSE
CCND1	GuideToPharmacology	agonist	0.625091	IUPHAR.LIGAND:2708	BADGE	iuphar.ligand:2708	FALSE	FALSE	FALSE
CCND1	GuideToPharmacology	inhibitor	0.625091	IUPHAR.LIGAND:2708	BADGE	iuphar.ligand:2708	FALSE	FALSE	FALSE
CCND1	GuideToPharmacology	agonist	0.625091	IUPHAR.LIGAND:2709	PAT5A	iuphar.ligand:2709	FALSE	FALSE	FALSE
CCND1	GuideToPharmacology	agonist	0.625091	IUPHAR.LIGAND:2692	15-DEOXY-&DELTA;-12,14-PROSTAGLANDIN J2	iuphar.ligand:2692	FALSE	FALSE	FALSE
CCND1	GuideToPharmacology	agonist	0.625091	IUPHAR.LIGAND:2705	FMOC-L-LEUCINE	iuphar.ligand:2705	FALSE	FALSE	FALSE
CCND1	GuideToPharmacology	agonist	0.625091	IUPHAR.LIGAND:2690	L-165461	iuphar.ligand:2690	FALSE	FALSE	FALSE
CCND1	GuideToPharmacology	agonist	0.625091	IUPHAR.LIGAND:2702	AD5075	iuphar.ligand:2701	FALSE	FALSE	FALSE
CCND1	GuideToPharmacology	agonist	0.625091	IUPHAR.LIGAND:2697	SB-219994	iuphar.ligand:2697	FALSE	FALSE	FALSE
CCND1	GuideToPharmacology	agonist	0.625091	IUPHAR.LIGAND:2701	AD5075	iuphar.ligand:2701	FALSE	FALSE	FALSE
CCND1	GuideToPharmacology	agonist	0.625091	IUPHAR.LIGAND:2695	GW0072	iuphar.ligand:2695	FALSE	FALSE	FALSE
CCND1	GuideToPharmacology	agonist	0.625091	IUPHAR.LIGAND:6743	MRL24	iuphar.ligand:6743	FALSE	FALSE	FALSE
CCND1	GuideToPharmacology	agonist	0.625091	IUPHAR.LIGAND:2699	NTZDPA	iuphar.ligand:2699	FALSE	FALSE	FALSE
CCND1	GuideToPharmacology	inhibitor	0.625091	IUPHAR.LIGAND:3444	T0070907	iuphar.ligand:3444	FALSE	FALSE	FALSE
CCND1	GuideToPharmacology	agonist	0.625091	IUPHAR.LIGAND:2710	[125I]SB-236636	iuphar.ligand:2710	FALSE	FALSE	FALSE
CCND1	GuideToPharmacology	agonist	0.625091	IUPHAR.LIGAND:2704	GW7845	iuphar.ligand:2704	FALSE	FALSE	FALSE
CCND1	GuideToPharmacology	agonist	0.625091	IUPHAR.LIGAND:2698	SB-219993	iuphar.ligand:2698	FALSE	FALSE	FALSE
BIRC3	ChEMBL	inhibitor	0.625091	BIRINAPANT	BIRINAPANT	ncit:C88295	FALSE	FALSE	TRUE
BIRC3	TdgClinicalTrial	NULL	0.625091	HGS1029	IAP INHIBITOR HGS1029	ncit:C78484	FALSE	FALSE	FALSE
BIRC3	TALC	inhibitor	0.625091	TL 32711	BIRINAPANT	ncit:C88295	FALSE	FALSE	TRUE
CTNNA2	GuideToPharmacology	inhibitor	0.625091	IUPHAR.LIGAND:9355	GNE-3511	iuphar.ligand:9355	FALSE	FALSE	FALSE
CTNNA2	GuideToPharmacology	inhibitor	0.625091	IUPHAR.LIGAND:12706	BOS172722	drugbank:DB15498	FALSE	FALSE	FALSE
CTNNA2	GuideToPharmacology	inhibitor	0.625091	IUPHAR.LIGAND:9915	PAMAPIMOD	ncit:C90996	FALSE	FALSE	FALSE
CTNNA2	GuideToPharmacology	inhibitor	0.625091	IUPHAR.LIGAND:9836	TANZISERTIB	ncit:C152510	FALSE	FALSE	FALSE
TP73	NCI	NULL	0.596678	GM-CSF	GM-CSF	iuphar.ligand:4942	FALSE	FALSE	FALSE
BIRC5	GuideToPharmacology	agonist	0.596678	IUPHAR.LIGAND:3624	TIP39	iuphar.ligand:3624	FALSE	FALSE	FALSE
BIRC5	GuideToPharmacology	agonist	0.596678	IUPHAR.LIGAND:1825	[ILE5]PTHRP-(1-36)	iuphar.ligand:1825	FALSE	FALSE	FALSE
BIRC5	TALC	inhibitor	0.596678	YM155	SEPANTRONIUM BROMIDE	chembl:CHEMBL2105734	FALSE	FALSE	TRUE
BIRC5	GuideToPharmacology	inhibitor	0.596678	IUPHAR.LIGAND:8825	COMPOUND III [PMID: 24080463]	iuphar.ligand:8825	FALSE	FALSE	FALSE
BIRC5	GuideToPharmacology	agonist	0.596678	IUPHAR.LIGAND:1822	PTHRP-(1-34) (HUMAN)	iuphar.ligand:1822	FALSE	FALSE	FALSE
BIRC5	GuideToPharmacology	inhibitor	0.596678	IUPHAR.LIGAND:1820	[D-TRP12]PTH-(7-34) (BOVINE)	iuphar.ligand:1820	FALSE	FALSE	FALSE
BIRC5	GuideToPharmacology	agonist	0.596678	IUPHAR.LIGAND:1824	[ILE5,TRP23]PTHRP-(5-36) (HUMAN)	iuphar.ligand:1824	FALSE	FALSE	FALSE
BIRC5	ChEMBL	vaccine	0.596678	SVN53-67/M57-KLH PEPTIDE VACCINE	SVN53-67/M57-KLH PEPTIDE VACCINE	ncit:C95705	FALSE	FALSE	FALSE
BIRC5	GuideToPharmacology	inhibitor	0.596678	IUPHAR.LIGAND:1828	TIP39-(7-39) (MOUSE)	iuphar.ligand:1828	FALSE	FALSE	FALSE
APC	JAX-CKB	NULL	0.596678	BMS-906024	OSUGACESTAT	ncit:C116872	FALSE	FALSE	TRUE
APC	GuideToPharmacology	agonist	0.596678	IUPHAR.LIGAND:1731	5BRUTP	iuphar.ligand:1731	FALSE	FALSE	FALSE
TGFB1	NCI	NULL	0.593307	SILYMARIN	SILYMARIN	rxcui:9794	FALSE	FALSE	FALSE
ITGB2	NCI	NULL	0.583419	MMF	MONOMETHYL FUMARATE	rxcui:1546433	TRUE	FALSE	FALSE
ITGB2	NCI	NULL	0.583419	ANTI-CD3 ANTIBODY	VISILIZUMAB	ncit:C2229	FALSE	FALSE	FALSE
FGF1	ChEMBL	inhibitor	0.583419	MUPARFOSTAT	MUPARFOSTAT	ncit:C38690	FALSE	FALSE	FALSE
CCND2	ClearityFoundationBiomarkers	NULL	0.583419	LEE011	RIBOCICLIB	rxcui:1873916	TRUE	FALSE	TRUE
CCND3	ClearityFoundationBiomarkers	NULL	0.583419	LEE011	RIBOCICLIB	rxcui:1873916	TRUE	FALSE	TRUE
CCN2	NCI	NULL	0.577007	ANGIOTENSIN CONVERTING ENZYME INHIBITOR	ACE INHIBITOR	ncit:C247	FALSE	FALSE	FALSE
GSK3B	ChEMBL	inhibitor	0.570736	ELRAGLUSIB	ELRAGLUSIB	ncit:C156792	FALSE	FALSE	FALSE
MYC	NCI	NULL	0.562582	ACIVICIN	ACIVICIN	ncit:C986	FALSE	FALSE	FALSE
TP73	NCI	NULL	0.561579	EGCG	EPIGALLOCATECHIN GALLATE	rxcui:24246	TRUE	FALSE	FALSE
CCND2	ClearityFoundationBiomarkers	NULL	0.552712	LY2835219	ABEMACICLIB	rxcui:1946825	TRUE	FALSE	TRUE
CCND3	ClearityFoundationBiomarkers	NULL	0.552712	LY2835219	ABEMACICLIB	rxcui:1946825	TRUE	FALSE	TRUE
TCF7L2	PharmGKB	NULL	0.53854	metformin	METFORMIN	rxcui:6809	TRUE	FALSE	TRUE
CTNNB1	JAX-CKB	NULL	0.530381	MPI-0479605	MPI-0479605	iuphar.ligand:9399	FALSE	FALSE	FALSE
CTNNB1	JAX-CKB	NULL	0.530381	BAY1217389	BAY1217389	iuphar.ligand:12705	FALSE	FALSE	FALSE
CTNNB1	JAX-CKB	NULL	0.530381	BAY1161909	EMPESERTIB	ncit:C116074	FALSE	FALSE	FALSE
AREG	CIViC	NULL	0.525077	PANITUMUMAB	PANITUMUMAB	rxcui:263034	TRUE	TRUE	TRUE
BIRC2	GuideToPharmacology	inhibitor	0.525077	IUPHAR.LIGAND:1725	PPADS	iuphar.ligand:1725	FALSE	FALSE	FALSE
SERPINE1	NCI	NULL	0.514781	NORETHISTERONE ACETATE	NORETHINDRONE ACETATE	rxcui:31983	TRUE	FALSE	FALSE
SERPINE1	NCI	NULL	0.514781	GLYCYRRHETINIC ACID	GLYCYRRHETINIC ACID	rxcui:1311506	TRUE	FALSE	FALSE
NF2	CGI	NULL	0.500073	Everolimus	EVEROLIMUS	rxcui:141704	TRUE	TRUE	TRUE
NF2	CIViC	NULL	0.500073	EVEROLIMUS	EVEROLIMUS	rxcui:141704	TRUE	TRUE	TRUE
MYC	NCI	NULL	0.500073	IL-9	IL-9	iuphar.ligand:5000	FALSE	FALSE	FALSE
MYC	NCI	NULL	0.500073	QUINAPRIL	QUINAPRIL	rxcui:35208	TRUE	FALSE	FALSE
MYC	NCI	NULL	0.500073	HYPOXANTHINE	HYPOXANTHINE	ncit:C29105	FALSE	FALSE	FALSE
MYC	NCI	NULL	0.500073	POH	PERILLYL ALCOHOL	ncit:C1461	FALSE	FALSE	FALSE
ACTB	GuideToPharmacology	inhibitor	0.500073	IUPHAR.LIGAND:7679	AZD3778	iuphar.ligand:7679	FALSE	FALSE	FALSE
ACTB	GuideToPharmacology	agonist	0.500073	IUPHAR.LIGAND:765	[125I]CCL7 (HUMAN)	iuphar.ligand:765	FALSE	FALSE	FALSE
ACTB	GuideToPharmacology	agonist	0.500073	IUPHAR.LIGAND:771	CCL2	iuphar.ligand:771	FALSE	FALSE	FALSE
ACTB	GuideToPharmacology	inhibitor	0.500073	IUPHAR.LIGAND:836	CXCL11	iuphar.ligand:836	FALSE	FALSE	FALSE
ACTB	GuideToPharmacology	agonist	0.500073	IUPHAR.LIGAND:773	HIV-TAT	iuphar.ligand:773	FALSE	FALSE	FALSE
ACTB	GuideToPharmacology	agonist	0.500073	IUPHAR.LIGAND:764	[125I]CCL5 (HUMAN)	iuphar.ligand:764	FALSE	FALSE	FALSE
ACTG1	GuideToPharmacology	agonist	0.500073	IUPHAR.LIGAND:4358	CXCL12&ALPHA;	iuphar.ligand:4358	FALSE	FALSE	FALSE
ACTG1	GuideToPharmacology	inhibitor	0.500073	IUPHAR.LIGAND:773	HIV-TAT	iuphar.ligand:773	FALSE	FALSE	FALSE
LATS2	GuideToPharmacology	inhibitor	0.486182	IUPHAR.LIGAND:5672	LESTAURTINIB	ncit:C48402	FALSE	FALSE	TRUE
ITGB2	ChEMBL	inhibitor	0.486182	ROVELIZUMAB	ROVELIZUMAB	ncit:C152264	FALSE	FALSE	FALSE
ITGB2	NCI	NULL	0.486182	RANTES	RECOMBINANT RANTES	ncit:C1211	FALSE	FALSE	FALSE
ITGB2	ChEMBL	inhibitor	0.486182	EFALIZUMAB	EFALIZUMAB	rxcui:356988	TRUE	TRUE	FALSE
FGF1	ChEMBL	inhibitor	0.486182	SURAMIN HEXASODIUM	SURAMIN HEXASODIUM	chembl:CHEMBL413376	FALSE	FALSE	FALSE
SMAD7	PharmGKB	NULL	0.486182	capecitabine	CAPECITABINE	rxcui:194000	TRUE	FALSE	TRUE
TCF7L2	PharmGKB	NULL	0.482829	cyclosporine	CYCLOSPORINE	rxcui:3008	TRUE	TRUE	FALSE
APC	NCI	NULL	0.477342	DIFLUOROMETHYLORNITHINE	EFLORNITHINE	ncit:C226	FALSE	FALSE	FALSE
DLG4	NCI	NULL	0.460594	HALOPERIDOL	HALOPERIDOL DECANOATE	rxcui:26420	TRUE	FALSE	FALSE
GSK3B	DTC	NULL	0.456588	BETULINIC ACID	BETULINIC ACID	ncit:C38126	FALSE	FALSE	FALSE
GSK3B	DTC	NULL	0.456588	OLEANOLIC_ACID	OLEANOLIC ACID	iuphar.ligand:3306	FALSE	FALSE	FALSE
TCF7L2	PharmGKB	NULL	0.456588	hydrochlorothiazide	HYDROCHLOROTHIAZIDE	rxcui:5487	TRUE	FALSE	FALSE
TP73	NCI	NULL	0.454612	ANTIOXIDANT	ANTIOXIDANT	ncit:C275	FALSE	FALSE	FALSE
MYC	NCI	NULL	0.450066	THYROTROPIN	THYROTROPIN	rxcui:10579	TRUE	FALSE	FALSE
AFP	NCI	NULL	0.448784	N-METHYL-N-NITROSOUREA	METHYLNITROSOUREA	ncit:C645	FALSE	FALSE	FALSE
TGFB1	NCI	NULL	0.44498	KEYHOLE LIMPET HEMOCYANIN	KEYHOLE LIMPET HEMOCYANIN	ncit:C1139	FALSE	FALSE	FALSE
TGFB1	ChEMBL	inhibitor	0.44498	METELIMUMAB	METELIMUMAB	ncit:C166745	FALSE	FALSE	FALSE
TGFB1	ChEMBL	inhibitor	0.44498	LY-2382770	LY-2382770	chembl:CHEMBL2109585	FALSE	FALSE	FALSE
DVL2	PharmGKB	NULL	0.44498	erlotinib	ERLOTINIB	rxcui:337525	TRUE	FALSE	TRUE
DLG5	PharmGKB	NULL	0.441241	fluorouracil	FLUOROURACIL	rxcui:4492	TRUE	FALSE	TRUE
SERPINE1	NCI	NULL	0.441241	RECOMBINANT INTERLEUKIN	RECOMBINANT INTERLEUKIN	ncit:C593	FALSE	FALSE	FALSE
SERPINE1	NCI	NULL	0.441241	DALTEPARIN	TINZAPARIN SODIUM	rxcui:104466	TRUE	FALSE	FALSE
NF2	CGI	NULL	0.437564	Bevacizumab	BEVACIZUMAB-AWWB	rxcui:2046138	TRUE	TRUE	TRUE
BIRC2	GuideToPharmacology	agonist	0.437564	IUPHAR.LIGAND:1711	2MESATP	iuphar.ligand:1711	FALSE	FALSE	FALSE
CCN2	NCI	NULL	0.432756	VEGF	RECOMBINANT VASCULAR ENDOTHELIAL GROWTH FACTOR	ncit:C1272	FALSE	FALSE	FALSE
CCND2	ClearityFoundationBiomarkers	NULL	0.428634	PD 0332991	PALBOCICLIB	rxcui:1601374	TRUE	FALSE	TRUE
CCND2	CGI	NULL	0.428634	Palbociclib	PALBOCICLIB	rxcui:1601374	TRUE	FALSE	TRUE
CCND3	ClearityFoundationBiomarkers	NULL	0.428634	PD 0332991	PALBOCICLIB	rxcui:1601374	TRUE	FALSE	TRUE
CCND3	CIViC	NULL	0.428634	PALBOCICLIB	PALBOCICLIB	rxcui:1601374	TRUE	FALSE	TRUE
NF2	CGI	NULL	0.423449	Lapatinib	LAPATINIB	rxcui:480167	TRUE	FALSE	TRUE
ITGB2	NCI	NULL	0.416728	LYMPHOKINES	RECOMBINANT LYMPHOKINE	ncit:C621	FALSE	FALSE	FALSE
CTNNA2	GuideToPharmacology	inhibitor	0.416728	IUPHAR.LIGAND:10371	COMPOUND 20 [PMID: 30998356]	iuphar.ligand:10371	FALSE	FALSE	FALSE
CTNNA2	GuideToPharmacology	inhibitor	0.416728	IUPHAR.LIGAND:5998	JNK INHIBITOR VIII	iuphar.ligand:5998	FALSE	FALSE	FALSE
CCN2	NCI	NULL	0.403905	2-METHOXYESTRADIOL	2-METHOXYESTRADIOL	ncit:C965	FALSE	FALSE	FALSE
AREG	CIViC	NULL	0.403905	CRIZOTINIB	CRIZOTINIB	rxcui:1148495	TRUE	FALSE	TRUE
AFP	NCI	NULL	0.403905	ANALGESICS	ANALGESIC AGENT	ncit:C241	FALSE	FALSE	FALSE
AFP	NCI	NULL	0.403905	RUTIN	RUTIN	rxcui:9500	TRUE	FALSE	FALSE
CTNNA1	GuideToPharmacology	inhibitor	0.403905	IUPHAR.LIGAND:9210	ULIXERTINIB	ncit:C104744	FALSE	FALSE	FALSE
BIRC5	NCI	NULL	0.397785	VALDECOXIB	VALDECOXIB	rxcui:278567	TRUE	FALSE	FALSE
CTNNB1	ChEMBL	inhibitor	0.397785	PRI-724	PRI-724	drugbank:DB15034	FALSE	FALSE	FALSE
CTNNB1	GuideToPharmacology	inhibitor	0.397785	IUPHAR.LIGAND:6040	SKF-86002	iuphar.ligand:6040	FALSE	FALSE	FALSE
CTNNB1	JAX-CKB	NULL	0.397785	BMS-906024	OSUGACESTAT	ncit:C116872	FALSE	FALSE	TRUE
CTNNB1	GuideToPharmacology	inhibitor	0.397785	IUPHAR.LIGAND:11096	MAPK13-IN-1	iuphar.ligand:11096	FALSE	FALSE	FALSE
CTNNB1	GuideToPharmacology	inhibitor	0.397785	IUPHAR.LIGAND:9203	ACUMAPIMOD	ncit:C166567	FALSE	FALSE	FALSE
CTNNB1	GuideToPharmacology	inhibitor	0.397785	IUPHAR.LIGAND:11714	AZD7624	iuphar.ligand:11714	FALSE	FALSE	FALSE
CTNNB1	GuideToPharmacology	inhibitor	0.397785	IUPHAR.LIGAND:7818	PH-797804	iuphar.ligand:7818	FALSE	FALSE	FALSE
CTNNB1	GuideToPharmacology	inhibitor	0.397785	IUPHAR.LIGAND:9328	TAK-715	iuphar.ligand:9328	FALSE	FALSE	FALSE
CTNNB1	GuideToPharmacology	inhibitor	0.397785	IUPHAR.LIGAND:7815	DILMAPIMOD	ncit:C96531	FALSE	FALSE	FALSE
CTNNB1	GuideToPharmacology	inhibitor	0.397785	IUPHAR.LIGAND:6059	VX-702	iuphar.ligand:6059	FALSE	FALSE	FALSE
CTNNB1	GuideToPharmacology	inhibitor	0.397785	IUPHAR.LIGAND:7687	AZD6703	iuphar.ligand:7687	FALSE	FALSE	FALSE
APC	GuideToPharmacology	agonist	0.397785	IUPHAR.LIGAND:1736	DIQUAFOSOL	ncit:C65436	FALSE	FALSE	FALSE
APC	GuideToPharmacology	agonist	0.397785	IUPHAR.LIGAND:1732	AP4A	iuphar.ligand:1732	FALSE	FALSE	FALSE
APC	GuideToPharmacology	agonist	0.397785	IUPHAR.LIGAND:1737	DENUFOSOL	ncit:C78118	FALSE	FALSE	FALSE
AREG	PharmGKB	NULL	0.388946	capecitabine	CAPECITABINE	rxcui:194000	TRUE	FALSE	TRUE
SERPINE1	NCI	NULL	0.386086	MCP-1	RECOMBINANT MONOCYTE CHEMOATTRACTANT PROTEIN-1	ncit:C1393	FALSE	FALSE	FALSE
SERPINE1	NCI	NULL	0.386086	URIDINE	URIDINE	rxcui:11017	TRUE	FALSE	FALSE
DVL2	PharmGKB	NULL	0.386086	gefitinib	GEFITINIB	rxcui:328134	TRUE	FALSE	TRUE
TGFB1	NCI	NULL	0.381412	PIRFENIDONE	PIRFENIDONE	rxcui:1592254	TRUE	FALSE	FALSE
GSK3B	ChEMBL	inhibitor	0.38049	LITHIUM CITRATE	LITHIUM CITRATE	rxcui:52105	TRUE	FALSE	FALSE
ACTB	GuideToPharmacology	agonist	0.375055	IUPHAR.LIGAND:769	CCL11	iuphar.ligand:769	FALSE	FALSE	FALSE
ACTG1	TdgClinicalTrial	NULL	0.375055	THYMOSIN BETA-4	THYMOSIN BETA-4	drugbank:DB12003	FALSE	FALSE	FALSE
CCND2	ClearityFoundationBiomarkers	NULL	0.375055	BAY1000394	RONICICLIB	ncit:C92579	FALSE	FALSE	TRUE
CCND3	ClearityFoundationBiomarkers	NULL	0.375055	BAY1000394	RONICICLIB	ncit:C92579	FALSE	FALSE	TRUE
BIRC2	TALC	inhibitor	0.375055	LCL161	LCL161	iuphar.ligand:7912	FALSE	FALSE	TRUE
BIRC2	GuideToPharmacology	agonist	0.375055	IUPHAR.LIGAND:1712	ADP	iuphar.ligand:1712	FALSE	FALSE	FALSE
CCN2	NCI	NULL	0.367187	ALPHA-TOCOPHEROL	ALPHA-TOCOPHEROL	ncit:C74960	FALSE	FALSE	FALSE
NF2	CGI	NULL	0.364637	AR42	AR-42	drugbank:DB12707	FALSE	FALSE	TRUE
LATS2	GuideToPharmacology	inhibitor	0.364637	IUPHAR.LIGAND:5196	GSK690693	iuphar.ligand:5196	FALSE	FALSE	FALSE
BIRC3	TALC	inhibitor	0.357195	LCL161	LCL161	iuphar.ligand:7912	FALSE	FALSE	TRUE
TGFB1	ChEMBL	binder	0.355984	BINTRAFUSP ALFA	BINTRAFUSP ALFA	ncit:C124229	FALSE	FALSE	FALSE
TGFB1	NCI	NULL	0.355984	AMIFOSTINE	AMIFOSTINE ANHYDROUS	rxcui:1545987	TRUE	FALSE	FALSE
LATS2	GuideToPharmacology	inhibitor	0.343187	IUPHAR.LIGAND:346	STAUROSPORINE	drugbank:DB02010	FALSE	FALSE	FALSE
SERPINE1	NCI	NULL	0.343187	PREMARIN	ESTROGENS, CONJUGATED (USP)	rxcui:4099	TRUE	FALSE	FALSE
CSNK1D	DTC	NULL	0.340959	SB-242235	SB-242235	chembl:CHEMBL95692	FALSE	FALSE	FALSE
APC	JAX-CKB	NULL	0.340959	Vantictumab	VANTICTUMAB	ncit:C96799	FALSE	FALSE	FALSE
NF2	CIViC	NULL	0.336588	TEMSIROLIMUS	TEMSIROLIMUS	rxcui:657797	TRUE	FALSE	TRUE
AFP	NCI	NULL	0.336588	BROMODEOXYURIDINE	BROXURIDINE	ncit:C318	FALSE	FALSE	FALSE
AFP	NCI	NULL	0.336588	BCG	BACILLUS CALMETTE-GUERIN ANTIGEN	ncit:C77178	FALSE	FALSE	FALSE
AREG	PharmGKB	NULL	0.333382	irinotecan	IRINOTECAN HYDROCHLORIDE	rxcui:153329	TRUE	FALSE	TRUE
PRKCI	TdgClinicalTrial	NULL	0.328173	INGENOL MEBUTATE	INGENOL MEBUTATE	rxcui:1242806	TRUE	FALSE	FALSE
AMH	NCI	NULL	0.325125	HUMAN CHORIONIC GONADOTROPIN	HUMAN CHORIONIC GONADOTROPIN	rxcui:340705	TRUE	FALSE	FALSE
BMP7	PharmGKB	NULL	0.318228	thioguanine	THIOGUANINE	rxcui:10485	TRUE	FALSE	TRUE
CTNNB1	JAX-CKB	NULL	0.318228	Triciribine	TRICIRIBINE	ncit:C142998	FALSE	FALSE	TRUE
SMAD2	NCI	NULL	0.312546	HYDROCORTISONE	HYDROCORTISONE BUTYRATE	rxcui:103468	TRUE	FALSE	FALSE
CCND1	GuideToPharmacology	agonist	0.312546	IUPHAR.LIGAND:2689	L-796449	iuphar.ligand:2689	FALSE	FALSE	FALSE
CCND1	GuideToPharmacology	agonist	0.312546	IUPHAR.LIGAND:2656	GW409544	iuphar.ligand:2656	FALSE	FALSE	FALSE
CCND1	GuideToPharmacology	agonist	0.312546	IUPHAR.LIGAND:2657	LY-510929	iuphar.ligand:2657	FALSE	FALSE	FALSE
CCND1	GuideToPharmacology	agonist	0.312546	IUPHAR.LIGAND:2707	NETOGLITAZONE	ncit:C72822	FALSE	FALSE	FALSE
CCND1	GuideToPharmacology	agonist	0.312546	IUPHAR.LIGAND:2663	AD-5061	iuphar.ligand:2663	FALSE	FALSE	FALSE
CCND1	GuideToPharmacology	agonist	0.312546	IUPHAR.LIGAND:2677	MK-0767	iuphar.ligand:2677	FALSE	FALSE	FALSE
CCND1	GuideToPharmacology	agonist	0.312546	IUPHAR.LIGAND:2670	REGLITAZAR	ncit:C98152	FALSE	FALSE	FALSE
CCND1	GuideToPharmacology	agonist	0.312546	IUPHAR.LIGAND:2659	LY-465608	iuphar.ligand:2659	FALSE	FALSE	FALSE
CCND1	GuideToPharmacology	agonist	0.312546	IUPHAR.LIGAND:8907	EDAGLITAZONE	ncit:C75189	FALSE	FALSE	FALSE
CCND1	GuideToPharmacology	agonist	0.312546	IUPHAR.LIGAND:2665	TZD18	iuphar.ligand:2665	FALSE	FALSE	FALSE
PRKCI	ChEMBL	inhibitor	0.308869	GSK-690693	GSK-690693	drugbank:DB12745	FALSE	FALSE	FALSE
PRKCI	ChEMBL	inhibitor	0.308869	CEP-2563	CEP-2563	chembl:CHEMBL3545332	FALSE	FALSE	FALSE
AMH	NCI	NULL	0.308869	ETHINYL ESTRADIOL	ETHINYL ESTRADIOL	rxcui:4124	TRUE	FALSE	FALSE
GSK3B	DTC	NULL	0.304392	SB-216763	SB 216763	iuphar.ligand:8015	FALSE	FALSE	FALSE
MYC	NCI	NULL	0.300044	NOVOBIOCIN	NOVOBIOCIN	rxcui:7538	FALSE	FALSE	FALSE
MYC	NCI	NULL	0.300044	AMIFOSTINE	AMIFOSTINE ANHYDROUS	rxcui:1545987	TRUE	FALSE	FALSE
MYC	NCI	NULL	0.300044	IL-5	IL-5	iuphar.ligand:4997	FALSE	FALSE	FALSE
ACTB	GuideToPharmacology	agonist	0.300044	IUPHAR.LIGAND:770	CCL13	iuphar.ligand:770	FALSE	FALSE	FALSE
ACTB	GuideToPharmacology	agonist	0.300044	IUPHAR.LIGAND:759	CCL7	iuphar.ligand:759	FALSE	FALSE	FALSE
ACTB	GuideToPharmacology	agonist	0.300044	IUPHAR.LIGAND:758	CCL5	iuphar.ligand:758	FALSE	FALSE	FALSE
ACTB	GuideToPharmacology	agonist	0.300044	IUPHAR.LIGAND:772	CCL8	iuphar.ligand:772	FALSE	FALSE	FALSE
ACTG1	GuideToPharmacology	inhibitor	0.300044	IUPHAR.LIGAND:768	VMIP-II	iuphar.ligand:768	FALSE	FALSE	FALSE
BIRC5	NCI	NULL	0.298339	RAS INHIBITOR	RAS INHIBITOR	ncit:C1902	FALSE	FALSE	FALSE
BIRC5	GuideToPharmacology	inhibitor	0.298339	IUPHAR.LIGAND:1814	PTHRP-(7-34) (HUMAN, RAT, MOUSE)	iuphar.ligand:1814	FALSE	FALSE	FALSE
BIRC5	GuideToPharmacology	agonist	0.298339	IUPHAR.LIGAND:1808	[TRP23,TYR36]PTHRP-(1-36)-NH2 (HUMAN)	iuphar.ligand:1808	FALSE	FALSE	FALSE
BIRC5	GuideToPharmacology	agonist	0.298339	IUPHAR.LIGAND:4449	PTH-(1-34) (RAT)	iuphar.ligand:4449	FALSE	FALSE	FALSE
BIRC5	NCI	NULL	0.298339	ADM	ACELLULAR DERMAL MATRIX	ncit:C186783	FALSE	FALSE	FALSE
BIRC5	GuideToPharmacology	inhibitor	0.298339	IUPHAR.LIGAND:1827	TIP39-(7-39) (HUMAN/BOVINE)	iuphar.ligand:1827	FALSE	FALSE	FALSE
BIRC5	GuideToPharmacology	inhibitor	0.298339	IUPHAR.LIGAND:1788	PTHRP-(1-21)/PTH-(22-34) (HUMAN)	iuphar.ligand:1788	FALSE	FALSE	FALSE
BIRC5	GuideToPharmacology	agonist	0.298339	IUPHAR.LIGAND:1799	[ILE5,TRP23]PTHRP-(2-36) (HUMAN)	iuphar.ligand:1799	FALSE	FALSE	FALSE
BIRC5	GuideToPharmacology	agonist	0.298339	IUPHAR.LIGAND:1807	[PHE23]PTH-(1-34) (HUMAN)	iuphar.ligand:1807	FALSE	FALSE	FALSE
BIRC5	GuideToPharmacology	agonist	0.298339	IUPHAR.LIGAND:1800	[ILE5,TRP23]PTHRP-(3-36) (HUMAN)	iuphar.ligand:1800	FALSE	FALSE	FALSE
BIRC5	GuideToPharmacology	agonist	0.298339	IUPHAR.LIGAND:1801	[ILE5,TRP23]PTHRP-(4-36) (HUMAN)	iuphar.ligand:1801	FALSE	FALSE	FALSE
BIRC5	GuideToPharmacology	inhibitor	0.298339	IUPHAR.LIGAND:1819	[D-TRP12,TYR34]PTH-(7-34) (BOVINE)	iuphar.ligand:1819	FALSE	FALSE	FALSE
BIRC5	GuideToPharmacology	inhibitor	0.298339	IUPHAR.LIGAND:1821	[ILE5,TRP23]PTHRP-(5-36)	iuphar.ligand:1821	FALSE	FALSE	FALSE
BIRC5	GuideToPharmacology	agonist	0.298339	IUPHAR.LIGAND:1798	[ILE5,TRP23]PTHRP-(1-36) (HUMAN)	iuphar.ligand:1798	FALSE	FALSE	FALSE
BIRC5	GuideToPharmacology	agonist	0.298339	IUPHAR.LIGAND:1797	[ILE5,TRP23,TYR36]PTHRP-(1-36)-NH2 (HUMAN)	iuphar.ligand:1797	FALSE	FALSE	FALSE
BIRC5	GuideToPharmacology	agonist	0.298339	IUPHAR.LIGAND:1791	[125I][NLE8,21,TYR34]PTH-(1-34)-NH2 (RAT)	iuphar.ligand:1791	FALSE	FALSE	FALSE
BIRC5	GuideToPharmacology	agonist	0.298339	IUPHAR.LIGAND:1790	PTHRP-(1-36)	iuphar.ligand:1790	FALSE	FALSE	FALSE
BIRC5	GuideToPharmacology	agonist	0.298339	IUPHAR.LIGAND:1809	[TRP23]PTHRP-(1-36) (HUMAN)	iuphar.ligand:1809	FALSE	FALSE	FALSE
BIRC5	GuideToPharmacology	agonist	0.298339	IUPHAR.LIGAND:1794	[HIS5]PTH-(1-34) (HUMAN)	iuphar.ligand:1794	FALSE	FALSE	FALSE
BIRC5	GuideToPharmacology	agonist	0.298339	IUPHAR.LIGAND:1815	TIP39	iuphar.ligand:1815	FALSE	FALSE	FALSE
APC	GuideToPharmacology	agonist	0.298339	IUPHAR.LIGAND:1734	URIDINE 5'-TRIPHOSPHATE	drugbank:DB04005	FALSE	FALSE	FALSE
APC	GuideToPharmacology	inhibitor	0.298339	IUPHAR.LIGAND:1739	REACTIVE BLUE-2	iuphar.ligand:1739	FALSE	FALSE	FALSE
TGFB1	ChEMBL	inhibitor	0.296654	FRESOLIMUMAB	FRESOLIMUMAB	ncit:C63546	FALSE	FALSE	FALSE
TGFB1	NCI	NULL	0.296654	RAMIPRIL	RAMIPRIL	rxcui:35296	TRUE	FALSE	FALSE
AREG	CIViC	NULL	0.291709	CETUXIMAB	CETUXIMAB	rxcui:318341	TRUE	TRUE	TRUE
ITGB2	NCI	NULL	0.291709	PHORBOL MYRISTATE ACETATE	PHORBOL 12-MYRISTATE 13-ACETATE	iuphar.ligand:2341	FALSE	FALSE	FALSE
SMAD4	CIViC	NULL	0.291709	CETUXIMAB	CETUXIMAB	rxcui:318341	TRUE	TRUE	TRUE
GSK3B	DTC	NULL	0.285368	TCMDC-123789	CHEMBL:CHEMBL588859	chembl:CHEMBL588859	FALSE	FALSE	FALSE
GSK3B	DTC	NULL	0.285368	GW8510	CHEMBL:CHEMBL1276446	chembl:CHEMBL1276446	FALSE	FALSE	FALSE
SERPINE1	NCI	NULL	0.28079	ORAL CONTRACEPTIVE	ORAL CONTRACEPTIVE	ncit:C389	FALSE	FALSE	FALSE
AMH	NCI	NULL	0.28079	DIETHYLSTILBESTROL	DIETHYLSTILBESTROL	rxcui:3390	TRUE	FALSE	FALSE
AMH	NCI	NULL	0.28079	DES	DIETHYLSTILBESTROL	rxcui:3390	TRUE	FALSE	FALSE
PRKCZ	TdgClinicalTrial	NULL	0.273477	INGENOL MEBUTATE	INGENOL MEBUTATE	rxcui:1242806	TRUE	FALSE	FALSE
CCN2	NCI	NULL	0.26927	INOSITOL	INOSITOL	rxcui:5833	TRUE	FALSE	FALSE
CTNNA1	GuideToPharmacology	inhibitor	0.26927	IUPHAR.LIGAND:8014	LADUVIGLUSIB	ncit:C177060	FALSE	FALSE	FALSE
CSNK1D	DTC	NULL	0.26519	R-1487	R-1487	drugbank:DB06518	FALSE	FALSE	FALSE
CTNNB1	GuideToPharmacology	inhibitor	0.26519	IUPHAR.LIGAND:8179	PF-03715455	iuphar.ligand:8179	FALSE	FALSE	FALSE
CTNNB1	GuideToPharmacology	inhibitor	0.26519	IUPHAR.LIGAND:7817	TALMAPIMOD	ncit:C79841	FALSE	FALSE	FALSE
CTNNB1	GuideToPharmacology	inhibitor	0.26519	IUPHAR.LIGAND:7835	LOSMAPIMOD	ncit:C96532	FALSE	FALSE	FALSE
CTNNB1	CIViC	NULL	0.26519	ANTI-PD-L1 MONOCLONAL ANTIBODY	ANTI-PD-L1 MONOCLONAL ANTIBODY	ncit:C128057	FALSE	FALSE	TRUE
CTNNB1	GuideToPharmacology	inhibitor	0.26519	IUPHAR.LIGAND:9610	CBS-3595	iuphar.ligand:9610	FALSE	FALSE	FALSE
APC	NCI	NULL	0.26519	HISTONE DEACETYLASE INHIBITOR	HISTONE DEACETYLASE INHIBITOR	ncit:C1946	FALSE	FALSE	FALSE
PRKCI	ChEMBL	inhibitor	0.262538	UCN-01	UCN-01	chembl:CHEMBL574737	FALSE	FALSE	FALSE
PRKCZ	ChEMBL	inhibitor	0.257391	GSK-690693	GSK-690693	drugbank:DB12745	FALSE	FALSE	FALSE
PRKCZ	ChEMBL	inhibitor	0.257391	CEP-2563	CEP-2563	chembl:CHEMBL3545332	FALSE	FALSE	FALSE
SERPINE1	NCI	NULL	0.257391	5-BROMODEOXYURIDINE	BROXURIDINE	ncit:C318	FALSE	FALSE	FALSE
APC	PharmGKB	NULL	0.255719	nirogacestat	NIROGACESTAT	rxcui:2670631	TRUE	FALSE	TRUE
APC	JAX-CKB	NULL	0.255719	Nirogacestat	NIROGACESTAT	rxcui:2670631	TRUE	FALSE	TRUE
TGFB1	NCI	NULL	0.254274	GALLIUM NITRATE	GALLIUM NITRATE	rxcui:25544	TRUE	FALSE	FALSE
TGFB1	PharmGKB	NULL	0.254274	glatiramer acetate	GLATIRAMER	rxcui:214582	TRUE	FALSE	FALSE
FGF1	GuideToPharmacology	inhibitor	0.25366	IUPHAR.LIGAND:5710	BOSUTINIB	rxcui:1307619	TRUE	FALSE	TRUE
CCN2	NCI	NULL	0.252441	SPIRONOLACTONE	SPIRONOLACTONE	rxcui:9997	TRUE	FALSE	FALSE
AFP	NCI	NULL	0.252441	BLEOMYCIN	BLEOMYCIN	rxcui:1622	TRUE	FALSE	TRUE
MYC	NCI	NULL	0.250037	LEUKOCYTE INTERFERON	RECOMBINANT INTERFERON ALFA	ncit:C225	FALSE	FALSE	FALSE
ACTG1	GuideToPharmacology	inhibitor	0.250037	IUPHAR.LIGAND:844	PLERIXAFOR	rxcui:733003	TRUE	FALSE	FALSE
BMP7	PharmGKB	NULL	0.244222	prednisone	PREDNISONE	rxcui:8640	TRUE	FALSE	FALSE
NF2	CGI	NULL	0.243091	Octreotide	OCTREOTIDE ACETATE	rxcui:221130	TRUE	FALSE	TRUE
ITGB2	NCI	NULL	0.243091	ENZYME INHIBITOR	ENZYME INHIBITOR	ncit:C471	FALSE	FALSE	FALSE
BIRC5	NCI	NULL	0.238671	AS101	AS101	iuphar.ligand:437	FALSE	FALSE	FALSE
BIRC5	NCI	NULL	0.238671	CANCER VACCINE	ANTINEOPLASTIC VACCINE	ncit:C1663	FALSE	FALSE	FALSE
BIRC5	NCI	NULL	0.238671	HOMOHARRINGTONINE	OMACETAXINE MEPESUCCINATE	rxcui:27100	TRUE	FALSE	FALSE
SERPINE1	NCI	NULL	0.237591	ORLISTAT	ORLISTAT	rxcui:37925	TRUE	FALSE	FALSE
SERPINE1	NCI	NULL	0.237591	CAPTOPRIL	CAPTOPRIL	rxcui:1998	TRUE	FALSE	FALSE
SMAD3	DTC	NULL	0.229291	SJ000260249	CHEMBL:CHEMBL601311	chembl:CHEMBL601311	FALSE	FALSE	FALSE
SMAD3	DTC	NULL	0.229291	TCMDC-124640	CHEMBL:CHEMBL547161	chembl:CHEMBL547161	FALSE	FALSE	FALSE
SMAD3	DTC	NULL	0.229291	CETYLPYRIDINIUM	CETYLPYRIDINIUM	rxcui:2286	TRUE	FALSE	FALSE
SMAD3	DTC	NULL	0.229291	TCMDC-125103	CHEMBL:CHEMBL530281	chembl:CHEMBL530281	FALSE	FALSE	FALSE
SMAD3	DTC	NULL	0.229291	(S,R)-MEFLOQUINE	(S,R)-MEFLOQUINE	chembl:CHEMBL172	FALSE	FALSE	FALSE
SMAD3	DTC	NULL	0.229291	QUINOXALINE	QUINOXALINE	chembl:CHEMBL39444	FALSE	FALSE	FALSE
SMAD3	DTC	NULL	0.229291	TETRAPHENYL-UREA	CHEMBL:CHEMBL169335	chembl:CHEMBL169335	FALSE	FALSE	FALSE
SMAD3	DTC	NULL	0.229291	SJ000100732	CHEMBL:CHEMBL592819	chembl:CHEMBL592819	FALSE	FALSE	FALSE
GSK3B	ChEMBL	inhibitor	0.228294	LITHIUM CARBONATE	LITHIUM CARBONATE	rxcui:42351	TRUE	FALSE	FALSE
CTNNB1	JAX-CKB	NULL	0.227306	Vantictumab	VANTICTUMAB	ncit:C96799	FALSE	FALSE	FALSE
CCN2	NCI	NULL	0.224392	DHEA	PRASTERONE	rxcui:3143	TRUE	FALSE	FALSE
TGFB1	ChEMBL	inhibitor	0.22249	LUSPATERCEPT	LUSPATERCEPT-AAMT	rxcui:2262543	TRUE	FALSE	FALSE
PRKCZ	ChEMBL	inhibitor	0.218782	UCN-01	UCN-01	chembl:CHEMBL574737	FALSE	FALSE	FALSE
CSNK1D	DTC	NULL	0.216974	LAS38096	LAS38096	iuphar.ligand:5617	FALSE	FALSE	FALSE
CSNK1D	DTC	NULL	0.216974	BMS-345541	BMS-345541	iuphar.ligand:5669	FALSE	FALSE	FALSE
MYC	NCI	NULL	0.214317	BESTATIN	UBENIMEX	ncit:C1015	FALSE	FALSE	FALSE
CCN2	NCI	NULL	0.212582	ENALAPRIL	ENALAPRIL MALEATE	rxcui:203123	TRUE	FALSE	FALSE
CCN2	NCI	NULL	0.212582	HUMAN CHORIONIC GONADOTROPIN	HUMAN CHORIONIC GONADOTROPIN	rxcui:340705	TRUE	FALSE	FALSE
CCN2	NCI	NULL	0.212582	DHT	THERAPEUTIC ANDROSTANOLONE	ncit:C29618	FALSE	FALSE	FALSE
STK3	DTC	NULL	0.210031	KD-025	BELUMOSUDIL	rxcui:2564025	TRUE	FALSE	FALSE
ITGB2	NCI	NULL	0.208364	SODIUM BUTYRATE	SODIUM BUTYRATE	ncit:C2337	FALSE	FALSE	FALSE
CCND1	GuideToPharmacology	agonist	0.208364	IUPHAR.LIGAND:10751	(R)-16 [PMID: 32267688]	iuphar.ligand:10751	FALSE	FALSE	FALSE
CCND1	GuideToPharmacology	agonist	0.208364	IUPHAR.LIGAND:2664	RAGAGLITAZAR	ncit:C75192	FALSE	FALSE	FALSE
CCND1	GuideToPharmacology	agonist	0.208364	IUPHAR.LIGAND:2717	BARDOXOLONE	ncit:C48382	FALSE	FALSE	FALSE
CCND1	GuideToPharmacology	agonist	0.208364	IUPHAR.LIGAND:2673	GW9578	iuphar.ligand:2673	FALSE	FALSE	FALSE
CCND1	GuideToPharmacology	agonist	0.208364	IUPHAR.LIGAND:10030	VCE-004.3	iuphar.ligand:10030	FALSE	FALSE	FALSE
CCND1	GuideToPharmacology	agonist	0.208364	IUPHAR.LIGAND:2814	LG100754	iuphar.ligand:2814	FALSE	FALSE	FALSE
CCND1	GuideToPharmacology	agonist	0.208364	IUPHAR.LIGAND:10002	TRIPLE MODULATOR 10 [PMID: 29878767]	iuphar.ligand:10002	FALSE	FALSE	FALSE
MYC	NCI	NULL	0.204575	ESTRONE	ESTRONE	rxcui:4103	TRUE	FALSE	FALSE
CCN2	NCI	NULL	0.201953	HYDROGEN PEROXIDE	HYDROGEN PEROXIDE	rxcui:5499	TRUE	FALSE	FALSE
BIRC5	NCI	NULL	0.198893	ROFECOXIB	ROFECOXIB	rxcui:232158	TRUE	FALSE	FALSE
BIRC5	NCI	NULL	0.198893	MITHRAMYCIN	PLICAMYCIN	rxcui:6995	TRUE	FALSE	FALSE
BIRC5	NCI	NULL	0.198893	VIOXX	ROFECOXIB	rxcui:232158	TRUE	FALSE	FALSE
BIRC5	NCI	NULL	0.198893	CALCITONIN	CALCITONIN	rxcui:1311287	TRUE	FALSE	FALSE
SMAD2	DTC	NULL	0.198893	CURCUMIN	CURCUMIN	rxcui:2955	TRUE	FALSE	FALSE
CTNNB1	GuideToPharmacology	inhibitor	0.198893	IUPHAR.LIGAND:9371	PF-670462	iuphar.ligand:9371	FALSE	FALSE	FALSE
CTNNB1	GuideToPharmacology	inhibitor	0.198893	IUPHAR.LIGAND:12122	COMPOUND 4E [PMID: 35546685]	iuphar.ligand:12122	FALSE	FALSE	FALSE
CTNNB1	GuideToPharmacology	inhibitor	0.198893	IUPHAR.LIGAND:7959	RALIMETINIB	ncit:C143046	FALSE	FALSE	FALSE
APC	JAX-CKB	NULL	0.198893	Abiraterone	ABIRATERONE ACETATE	rxcui:1100071	TRUE	FALSE	TRUE
SERPINE1	NCI	NULL	0.193043	LEVOTHYROXINE	LEVOTHYROXINE	rxcui:10582	TRUE	FALSE	FALSE
SERPINE1	TdgClinicalTrial	NULL	0.193043	UROKINASE	UROKINASE	rxcui:11055	TRUE	FALSE	FALSE
SERPINE1	NCI	NULL	0.193043	GM-CSF	GM-CSF	iuphar.ligand:4942	FALSE	FALSE	FALSE
GSK3B	DTC	NULL	0.190245	URSOLIC ACID	URSOLIC ACID	rxcui:1426931	FALSE	FALSE	FALSE
TGFBR1	DTC	inhibitor	0.187527	HESPERADIN	HESPERADIN	rxcui:1552358	FALSE	FALSE	FALSE
MYC	NCI	NULL	0.187527	CALCITRIOL	CALCITRIOL	rxcui:1894	TRUE	FALSE	FALSE
MYC	NCI	NULL	0.187527	GLN	GLUTAMINE	rxcui:4885	TRUE	FALSE	FALSE
MYC	NCI	NULL	0.187527	LIF	LIF	iuphar.ligand:5016	FALSE	FALSE	FALSE
CSNK1D	DTC	NULL	0.183593	(RS)-ROSCOVITINE	(RS)-ROSCOVITINE	chembl:CHEMBL52387	FALSE	FALSE	FALSE
APC	JAX-CKB	NULL	0.183593	Enzalutamide	ENZALUTAMIDE	rxcui:1307298	TRUE	FALSE	TRUE
CCND1	NCI	NULL	0.178598	MAPK INHIBITORS	MITOGEN-ACTIVATED PROTEIN KINASE INHIBITOR	ncit:C2149	FALSE	FALSE	FALSE
NF2	CGI	NULL	0.175026	Imatinib	IMATINIB	rxcui:282388	TRUE	FALSE	TRUE
YWHAG	DTC	NULL	0.175026	DOXORUBICIN HYDROCHLORIDE	DOXORUBICIN HYDROCHLORIDE	rxcui:142433	TRUE	FALSE	TRUE
PRKCI	ChEMBL	inhibitor	0.172156	SOTRASTAURIN	SOTRASTAURIN	ncit:C80630	FALSE	FALSE	FALSE
PRKCI	DTC	NULL	0.172156	SOTRASTAURIN	SOTRASTAURIN	ncit:C80630	FALSE	FALSE	FALSE
ITGB2	NCI	NULL	0.171594	ANTIBIOTIC	ANTIBIOTIC	ncit:C258	FALSE	FALSE	FALSE
SERPINE1	PharmGKB	NULL	0.171594	methylprednisolone	METHYLPREDNISOLONE	rxcui:6902	TRUE	FALSE	FALSE
CCN2	NCI	NULL	0.168294	PROPRANOLOL	PROPRANOLOL HYDROCHLORIDE	rxcui:82084	TRUE	FALSE	FALSE
CCN2	NCI	NULL	0.168294	THROMBIN	THROMBIN	rxcui:10528	TRUE	FALSE	FALSE
AFP	NCI	NULL	0.168294	FOLIC ACID	FOLIC ACID	rxcui:4511	TRUE	FALSE	FALSE
ITGB2	NCI	NULL	0.168294	H2O2	H2O2	iuphar.ligand:2448	FALSE	FALSE	FALSE
MYC	NCI	NULL	0.166691	TPN	DRUGSATFDA.NDA:008378	drugsatfda.nda:008378	FALSE	FALSE	FALSE
MYC	NCI	NULL	0.166691	MNU	METHYLNITROSOUREA	ncit:C645	FALSE	FALSE	FALSE
MYC	NCI	NULL	0.166691	HISTONE DEACETYLASE INHIBITOR	HISTONE DEACETYLASE INHIBITOR	ncit:C1946	FALSE	FALSE	FALSE
GSK3B	DTC	NULL	0.163067	AR-A014418	AR-AO-14418	drugbank:DB01950	FALSE	FALSE	FALSE
SERPINE1	NCI	NULL	0.162562	NIMODIPINE	NIMODIPINE	rxcui:7426	TRUE	FALSE	FALSE
LATS2	GuideToPharmacology	inhibitor	0.162061	IUPHAR.LIGAND:5702	MIDOSTAURIN	rxcui:1919083	TRUE	FALSE	TRUE
ITGB2	NCI	NULL	0.162061	METHYLPREDNISOLONE	METHYLPREDNISOLONE	rxcui:6902	TRUE	FALSE	FALSE
TGFB1	NCI	NULL	0.161811	ALPHA-TOCOPHEROL	ALPHA-TOCOPHEROL	ncit:C74960	FALSE	FALSE	FALSE
PRKCZ	DTC	NULL	0.156273	LAUROGUADINE	LAUROGUADINE	ncit:C80857	FALSE	FALSE	FALSE
CCND1	GuideToPharmacology	agonist	0.156273	IUPHAR.LIGAND:11137	SELADELPAR	ncit:C167015	FALSE	FALSE	FALSE
CCND1	GuideToPharmacology	agonist	0.156273	IUPHAR.LIGAND:2688	L-783483	iuphar.ligand:2688	FALSE	FALSE	FALSE
CCND1	GuideToPharmacology	agonist	0.156273	IUPHAR.LIGAND:2672	FARGLITAZAR	ncit:C81693	FALSE	FALSE	FALSE
CCND1	GuideToPharmacology	agonist	0.156273	IUPHAR.LIGAND:11135	ELAFIBRANOR	ncit:C166574	FALSE	FALSE	FALSE
BIRC2	GuideToPharmacology	agonist	0.154434	IUPHAR.LIGAND:1713	ADENOSINE TRIPHOSPHATE	rxcui:318	TRUE	FALSE	FALSE
SMAD3	DTC	NULL	0.152861	BISDEMETHOXYCURCUMIN	BISDEMETHOXYCURCUMIN	chembl:CHEMBL105350	FALSE	FALSE	FALSE
ACTB	NCI	NULL	0.150022	ETHINYLESTRADIOL	ETHINYL ESTRADIOL	rxcui:4124	TRUE	FALSE	FALSE
BIRC5	GuideToPharmacology	agonist	0.14917	IUPHAR.LIGAND:4448	TERIPARATIDE	rxcui:32915	TRUE	FALSE	FALSE
BIRC5	TdgClinicalTrial	NULL	0.14917	HGS1029	IAP INHIBITOR HGS1029	ncit:C78484	FALSE	FALSE	FALSE
TGFB1	NCI	NULL	0.148327	BRDU	BROXURIDINE	ncit:C318	FALSE	FALSE	FALSE
TGFB1	NCI	NULL	0.148327	HEPARAN SULFATE	HEPARAN SULFATE	rxcui:2603494	FALSE	FALSE	FALSE
SERPINE1	NCI	NULL	0.14708	9-CIS RETINOIC ACID	ALITRETINOIN	rxcui:81864	TRUE	FALSE	TRUE
PRKCI	ChEMBL	inhibitor	0.145855	MIDOSTAURIN	MIDOSTAURIN	rxcui:1919083	TRUE	FALSE	TRUE
ITGB2	NCI	NULL	0.145855	HYDROGEN PEROXIDE	HYDROGEN PEROXIDE	rxcui:5499	TRUE	FALSE	FALSE
CCN2	NCI	NULL	0.144252	STAUROSPORINE	STAUROSPORINE	ncit:C1237	FALSE	FALSE	FALSE
AFP	NCI	NULL	0.144252	RU 486	MIFEPRISTONE	rxcui:6964	TRUE	FALSE	FALSE
SMAD2	NCI	NULL	0.144252	ATRA	TRETINOIN	rxcui:10753	TRUE	FALSE	TRUE
PRKCZ	ChEMBL	inhibitor	0.143464	SOTRASTAURIN	SOTRASTAURIN	ncit:C80630	FALSE	FALSE	FALSE
PRKCZ	DTC	NULL	0.143464	SOTRASTAURIN	SOTRASTAURIN	ncit:C80630	FALSE	FALSE	FALSE
APC	NCI	NULL	0.143203	5-AZA-2&APOS;-DEOXYCYTIDINE	DECITABINE	rxcui:15657	TRUE	FALSE	TRUE
LATS2	GuideToPharmacology	inhibitor	0.142297	IUPHAR.LIGAND:5661	AST-487	iuphar.ligand:5661	FALSE	FALSE	TRUE
AMH	NCI	NULL	0.140395	HORMONES	THERAPEUTIC HORMONE	ncit:C548	FALSE	FALSE	FALSE
APC	NCI	NULL	0.140395	NSAID	NONSTEROIDAL ANTIINFLAMMATORY DRUG	ncit:C257	FALSE	FALSE	FALSE
CCND1	NCI	NULL	0.138909	CHEMOPREVENTIVE	CHEMOPREVENTIVE AGENT	ncit:C1892	FALSE	FALSE	FALSE
TGFB1	NCI	NULL	0.136917	TOREMIFENE	TOREMIFENE	rxcui:38409	TRUE	FALSE	TRUE
MYC	NCI	NULL	0.136384	PMSG	PREGNANT MARE SERUM GONADOTROPIN	ncit:C29773	FALSE	FALSE	FALSE
GSK3B	DTC	NULL	0.134291	AZD-1080	AZD-1080	chembl:CHEMBL1969664	FALSE	FALSE	FALSE
GSK3B	ChEMBL	inhibitor	0.134291	AZD-1080	AZD-1080	chembl:CHEMBL1969664	FALSE	FALSE	FALSE
NF2	CIViC	NULL	0.132595	SELUMETINIB	SELUMETINIB	rxcui:2289380	TRUE	FALSE	TRUE
BIRC5	NCI	NULL	0.132595	IL-12	IL-12	iuphar.ligand:4977	FALSE	FALSE	FALSE
BIRC5	NCI	NULL	0.132595	SCH 66336	LONAFARNIB	rxcui:2467553	TRUE	FALSE	FALSE
CTNNB1	GuideToPharmacology	inhibitor	0.132595	IUPHAR.LIGAND:9915	PAMAPIMOD	ncit:C90996	FALSE	FALSE	FALSE
CTNNB1	GuideToPharmacology	inhibitor	0.132595	IUPHAR.LIGAND:5719	NEFLAMAPIMOD	ncit:C170207	FALSE	FALSE	FALSE
CTNNB1	GuideToPharmacology	inhibitor	0.132595	IUPHAR.LIGAND:8836	PP1	iuphar.ligand:8836	FALSE	FALSE	FALSE
CTNNB1	GuideToPharmacology	inhibitor	0.132595	IUPHAR.LIGAND:11095	ARRY-371797	iuphar.ligand:11095	FALSE	FALSE	FALSE
BMP7	PharmGKB	NULL	0.129649	vincristine	VINCRISTINE	rxcui:11202	TRUE	FALSE	TRUE
BMP7	PharmGKB	NULL	0.129649	cytarabine	CYTARABINE	rxcui:3041	TRUE	FALSE	TRUE
BMP7	PharmGKB	NULL	0.128067	cyclophosphamide	CYCLOPHOSPHAMIDE ANHYDROUS	rxcui:1545988	TRUE	FALSE	FALSE
TGFB1	NCI	NULL	0.127137	IFN ALPHA-2B	INTERFERON ALFA-2B	rxcui:5880	TRUE	TRUE	TRUE
ITGB2	NCI	NULL	0.12683	PMA	TETRADECANOYLPHORBOL ACETATE	ncit:C866	FALSE	FALSE	FALSE
MYC	CIViC	NULL	0.125018	PREXASERTIB	PREXASERTIB	ncit:C91392	FALSE	FALSE	TRUE
CCND1	NCI	NULL	0.125018	MPA	MPA	iuphar.ligand:4595	FALSE	FALSE	FALSE
CCND1	GuideToPharmacology	agonist	0.125018	IUPHAR.LIGAND:12287	CHIGLITAZAR	iuphar.ligand:12287	FALSE	FALSE	FALSE
CCN2	NCI	NULL	0.122396	TRIIODOTHYRONINE	LIOTHYRONINE	rxcui:10814	TRUE	FALSE	FALSE
CTNNB1	PharmGKB	NULL	0.122396	lenalidomide	LENALIDOMIDE	rxcui:342369	TRUE	FALSE	TRUE
CTNNB1	JAX-CKB	NULL	0.122396	Temsirolimus	TEMSIROLIMUS	rxcui:657797	TRUE	FALSE	TRUE
BMP7	PharmGKB	NULL	0.122111	dexamethasone	DEXAMETHASONE	rxcui:3264	TRUE	FALSE	TRUE
PRKCZ	ChEMBL	inhibitor	0.121546	MIDOSTAURIN	MIDOSTAURIN	rxcui:1919083	TRUE	FALSE	TRUE
NF2	CGI	NULL	0.121546	Cetuximab	CETUXIMAB	rxcui:318341	TRUE	TRUE	TRUE
PRKCI	DTC	NULL	0.119336	GSK-269962A	GSK-269962A	drugbank:DB17030	FALSE	FALSE	FALSE
BIRC5	NCI	NULL	0.119336	IL-11	INTERLEUKIN-11	rxcui:1311380	TRUE	FALSE	FALSE
APC	JAX-CKB	NULL	0.119336	Binimetinib	BINIMETINIB	rxcui:2049122	TRUE	FALSE	TRUE
LATS2	GuideToPharmacology	inhibitor	0.119065	IUPHAR.LIGAND:5713	SUNITINIB	rxcui:357977	TRUE	FALSE	TRUE
CCN2	NCI	NULL	0.118796	DIGOXIN	DIGOXIN	rxcui:3407	TRUE	FALSE	FALSE
CCN2	GuideToPharmacology	inhibitor	0.118796	IUPHAR.LIGAND:346	STAUROSPORINE	drugbank:DB02010	FALSE	FALSE	FALSE
AFP	NCI	NULL	0.118796	ERYTHROPOIETIN	EPOETIN ALFA	rxcui:105694	TRUE	FALSE	FALSE
SERPINE1	NCI	NULL	0.118796	ARSENIC TRIOXIDE	ARSENIC TRIOXIDE	rxcui:18330	TRUE	FALSE	TRUE
SERPINE1	NCI	NULL	0.118796	VASOPRESSIN	ARGIPRESSIN	rxcui:1098	TRUE	FALSE	FALSE
TGFB1	NCI	NULL	0.118661	INOSITOL	INOSITOL	rxcui:5833	TRUE	FALSE	FALSE
TGFB1	NCI	NULL	0.118661	2-CDA	CLADRIBINE	rxcui:44157	TRUE	FALSE	FALSE
TP73	NCI	NULL	0.117862	ARABINOFURANOSYLCYTOSINE	CYTARABINE	rxcui:3041	TRUE	FALSE	TRUE
TP73	NCI	NULL	0.117862	VCR	VINCRISTINE	rxcui:11202	TRUE	FALSE	TRUE
STK3	DTC	NULL	0.116684	VATALANIB	VATALANIB	ncit:C1868	FALSE	FALSE	TRUE
AFP	NCI	NULL	0.115401	ACTINOMYCIN D	DACTINOMYCIN	rxcui:3100	TRUE	FALSE	FALSE
BMP7	PharmGKB	NULL	0.115401	daunorubicin	DAUNORUBICIN LIPOSOMAL	rxcui:214468	TRUE	FALSE	TRUE
SMAD3	DTC	NULL	0.114646	PIROCTONE	PIROCTONE	rxcui:2058907	FALSE	FALSE	FALSE
SMAD3	DTC	NULL	0.114646	STROPHANTHIDIN ACETATE	STROPHANTHIDIN ACETATE	chembl:CHEMBL1981679	FALSE	FALSE	FALSE
SMAD3	DTC	NULL	0.114646	AMINOQUINOL	AMINOQUINOL	ncit:C73273	FALSE	FALSE	FALSE
SMAD3	DTC	NULL	0.114646	SJ000260214	CHEMBL:CHEMBL602740	chembl:CHEMBL602740	FALSE	FALSE	FALSE
SMAD3	DTC	NULL	0.114646	TCMDC-125086	CHEMBL:CHEMBL532504	chembl:CHEMBL532504	FALSE	FALSE	FALSE
SMAD3	DTC	NULL	0.114646	GEOPYXIN A	GEOPYXIN A	chembl:CHEMBL1899565	FALSE	FALSE	FALSE
SMAD3	DTC	NULL	0.114646	SJ000157363	CHEMBL:CHEMBL590947	chembl:CHEMBL590947	FALSE	FALSE	FALSE
SMAD3	DTC	NULL	0.114646	TETRAZOLIUM RED	TETRAZOLIUM RED	chembl:CHEMBL401540	FALSE	FALSE	FALSE
SMAD3	DTC	NULL	0.114646	GLABROL	GLABROL	chembl:CHEMBL462721	FALSE	FALSE	FALSE
SMAD3	DTC	NULL	0.114646	DOLASTATIN 12	DOLASTATIN 12	chembl:CHEMBL448114	FALSE	FALSE	FALSE
SMAD3	DTC	NULL	0.114646	GNF-PF-2413	CHEMBL:CHEMBL578515	chembl:CHEMBL578515	FALSE	FALSE	FALSE
SMAD3	DTC	NULL	0.114646	1,7-O-DIACETYLGEOPYXIN A	CHEMBL:CHEMBL1873045	chembl:CHEMBL1873045	FALSE	FALSE	FALSE
APC	JAX-CKB	NULL	0.113653	Sulindac	SULINDAC	rxcui:10237	TRUE	FALSE	TRUE
CCND1	NCI	NULL	0.113653	ORAL CONTRACEPTIVE	ORAL CONTRACEPTIVE	ncit:C389	FALSE	FALSE	FALSE
CCND1	NCI	NULL	0.113653	ALPHA-TOCOPHEROL	ALPHA-TOCOPHEROL	ncit:C74960	FALSE	FALSE	FALSE
SMAD4	CIViC	NULL	0.11292	GEMCITABINE	GEMCITABINE	rxcui:12574	TRUE	FALSE	TRUE
TGFB1	NCI	NULL	0.111245	VITAMIN E	VITAMIN E	rxcui:11256	TRUE	FALSE	FALSE
TGFB1	NCI	NULL	0.111245	13-CIS-RETINOIC ACID	ISOTRETINOIN	rxcui:6064	TRUE	FALSE	FALSE
SERPINE1	PharmGKB	NULL	0.11031	fluoxetine	FLUOXETINE HYDROCHLORIDE	rxcui:227224	TRUE	FALSE	FALSE
GSK3B	DTC	NULL	0.108712	CEP-11981	CEP-11981	iuphar.ligand:8189	FALSE	FALSE	FALSE
TP73	NCI	NULL	0.108487	CARBOPLATIN	CARBOPLATIN	rxcui:40048	TRUE	FALSE	TRUE
MYC	NCI	NULL	0.107159	BRYOSTATIN-1	BRYOSTATIN 1	drugbank:DB11752	FALSE	FALSE	FALSE
MYC	NCI	NULL	0.107159	4-HYDROXY-TAMOXIFEN	AFIMOXIFENE	ncit:C975	FALSE	FALSE	TRUE
CTNNB1	JAX-CKB	NULL	0.106076	Osimertinib	OSIMERTINIB	rxcui:1721560	TRUE	FALSE	TRUE
TP73	NCI	NULL	0.10491	RETINOIC ACID	TRETINOIN	rxcui:10753	TRUE	FALSE	TRUE
TGFB1	NCI	NULL	0.104701	PIOGLITAZONE	PIOGLITAZONE HYDROCHLORIDE	rxcui:259319	TRUE	FALSE	FALSE
TGFB1	NCI	NULL	0.104701	ANDROGENS	THERAPEUTIC ANDROGEN	ncit:C243	FALSE	FALSE	FALSE
ITGB2	NCI	NULL	0.104182	SALINE	SODIUM CHLORIDE	rxcui:9863	TRUE	FALSE	FALSE
CCND1	NCI	NULL	0.104182	URACIL	URACIL	rxcui:10995	TRUE	FALSE	TRUE
CCND1	NCI	NULL	0.104182	PROTEIN SYNTHESIS INHIBITOR	PROTEIN SYNTHESIS INHIBITOR	ncit:C784	FALSE	FALSE	FALSE
CCND1	GuideToPharmacology	agonist	0.104182	IUPHAR.LIGAND:12737	LANIFIBRANOR	ncit:C166556	FALSE	FALSE	FALSE
CSNK1D	DTC	NULL	0.10377	AZD-1152-HQPA	BARASERTIB-HQPA	iuphar.ligand:5663	FALSE	FALSE	FALSE
AFP	NCI	NULL	0.102688	ETOPOSIDE	ETOPOSIDE	rxcui:4179	TRUE	FALSE	TRUE
AMH	NCI	NULL	0.101825	RETINOIC ACID	TRETINOIN	rxcui:10753	TRUE	FALSE	TRUE
AFP	NCI	NULL	0.100976	INDOMETHACIN	INDOMETHACIN	rxcui:5781	TRUE	FALSE	FALSE
AFP	NCI	NULL	0.100976	5-AZACYTIDINE	AZACITIDINE	rxcui:1251	TRUE	FALSE	TRUE
MYC	NCI	NULL	0.100015	RHGH	SOMATROPIN (RECOMBINANT DNA ORIGIN)	rxcui:314845	TRUE	FALSE	FALSE
MYC	NCI	NULL	0.100015	TRAIL	TRAIL	iuphar.ligand:5065	FALSE	FALSE	FALSE
SERPINE1	NCI	NULL	0.0996351	RETINOID	RETINOIC ACID AGENT	ncit:C804	FALSE	FALSE	FALSE
PRKCZ	DTC	NULL	0.0994463	GSK-269962A	GSK-269962A	drugbank:DB17030	FALSE	FALSE	FALSE
CSNK1D	DTC	NULL	0.0994463	TAK-715	TAK-715	drugbank:DB16108	FALSE	FALSE	FALSE
BIRC5	NCI	NULL	0.0994463	ENZYME INHIBITOR	ENZYME INHIBITOR	ncit:C471	FALSE	FALSE	FALSE
CTNNB1	DTC	NULL	0.0994463	CID 3237815	CHEMBL:CHEMBL410484	chembl:CHEMBL410484	FALSE	FALSE	FALSE
CCN2	NCI	NULL	0.0985135	CORTICOSTEROIDS	THERAPEUTIC CORTICOSTEROID	ncit:C211	FALSE	FALSE	FALSE
AFP	NCI	NULL	0.0985135	CORTICOSTEROIDS	THERAPEUTIC CORTICOSTEROID	ncit:C211	FALSE	FALSE	FALSE
APC	JAX-CKB	NULL	0.0954685	Buparlisib	BUPARLISIB	ncit:C90565	FALSE	FALSE	TRUE
BMP7	PharmGKB	NULL	0.0937637	methotrexate	METHOTREXATE	rxcui:6851	TRUE	FALSE	TRUE
MYC	ClearityFoundationBiomarkers	NULL	0.0937637	AMG900	AMG-900	iuphar.ligand:8060	FALSE	FALSE	TRUE
MYC	CIViC	NULL	0.0937637	GANETESPIB	GANETESPIB	ncit:C77872	FALSE	FALSE	TRUE
TGFB1	NCI	NULL	0.0936801	ADRIAMYCIN	ADRIAMYCIN	wikidata:Q47520887	FALSE	FALSE	FALSE
APC	JAX-CKB	NULL	0.0917966	Vinorelbine	VINORELBINE	rxcui:39541	TRUE	FALSE	TRUE
CCND1	GuideToPharmacology	agonist	0.0892988	IUPHAR.LIGAND:1052	LINOLEIC ACID	iuphar.ligand:1052	FALSE	FALSE	FALSE
CCND1	GuideToPharmacology	agonist	0.0892988	IUPHAR.LIGAND:2711	CIGLITAZONE	ncit:C72726	FALSE	FALSE	FALSE
CCND1	DTC	NULL	0.0892988	SELICICLIB	SELICICLIB	ncit:C62783	FALSE	FALSE	TRUE
TGFB1	NCI	NULL	0.0889961	PROTEASOME INHIBITOR	PROTEASOME INHIBITOR	ncit:C2160	FALSE	FALSE	FALSE
APC	JAX-CKB	NULL	0.0883968	Niclosamide	NICLOSAMIDE	rxcui:7402	TRUE	FALSE	FALSE
SMAD4	CIViC	NULL	0.0882482	FLUOROURACIL	FLUOROURACIL	rxcui:4492	TRUE	FALSE	TRUE
SERPINE1	PharmGKB	NULL	0.0882482	citalopram	CITALOPRAM	rxcui:2556	TRUE	FALSE	FALSE
MYC	NCI	NULL	0.0882482	ANTIBIOTIC	ANTIBIOTIC	ncit:C258	FALSE	FALSE	FALSE
AFP	NCI	NULL	0.0878055	NDGA	MASOPROCOL	rxcui:227239	TRUE	FALSE	FALSE
AFP	NCI	NULL	0.0878055	NICOTINE	NICOTINE POLACRILEX	rxcui:31765	TRUE	FALSE	FALSE
AFP	NCI	NULL	0.0878055	NORDIHYDROGUAIARETIC ACID	MASOPROCOL	rxcui:227239	TRUE	FALSE	FALSE
GSK3B	DTC	NULL	0.0878055	AZAKENPAULLONE	1-AZAKENPAULLONE	iuphar.ligand:8018	FALSE	FALSE	FALSE
CCN2	NCI	NULL	0.0859373	OESTRADIOL	ESTRADIOL VALERATE	rxcui:24395	TRUE	FALSE	FALSE
SERPINE1	NCI	NULL	0.0857968	EPIRUBICIN	EPIRUBICIN	rxcui:3995	TRUE	FALSE	TRUE
BIRC5	NCI	NULL	0.0852397	SULINDAC	SULINDAC	rxcui:10237	TRUE	FALSE	TRUE
TGFB1	NCI	NULL	0.0847581	ANTIOXIDANT	ANTIOXIDANT	ncit:C275	FALSE	FALSE	FALSE
ITGB2	NCI	NULL	0.0841469	COLCHICINE	COLCHICINE	rxcui:2683	TRUE	FALSE	FALSE
ITGB2	NCI	NULL	0.0833455	PENTOXIFYLLINE	PENTOXIFYLLINE	rxcui:8013	TRUE	FALSE	FALSE
MYC	NCI	NULL	0.0833455	METHYLPREDNISOLONE	METHYLPREDNISOLONE	rxcui:6902	TRUE	FALSE	FALSE
MYC	NCI	NULL	0.0833455	IL-1	RECOMBINANT INTERLEUKIN-1	ncit:C586	FALSE	FALSE	FALSE
CSNK1D	DTC	NULL	0.0823004	SB-203580	SB203580	iuphar.ligand:5269	FALSE	FALSE	FALSE
GSK3B	PharmGKB	NULL	0.0815337	fluoxetine	FLUOXETINE HYDROCHLORIDE	rxcui:227224	TRUE	FALSE	FALSE
SERPINE1	NCI	NULL	0.0812812	AZA	AZATHIOPRINE	rxcui:1256	TRUE	FALSE	TRUE
STK3	DTC	NULL	0.080781	LY-2090314	LY-2090314	drugbank:DB11913	FALSE	FALSE	FALSE
BIRC5	NCI	NULL	0.0795571	TRAIL	TRAIL	iuphar.ligand:5065	FALSE	FALSE	FALSE
BIRC5	NCI	NULL	0.0795571	INTERFERON BETA-1A	INTERFERON BETA-1A	rxcui:75917	TRUE	FALSE	FALSE
ITGB2	NCI	NULL	0.0788403	THALIDOMIDE	THALIDOMIDE	rxcui:10432	TRUE	TRUE	TRUE
CCND1	GuideToPharmacology	inhibitor	0.0781364	IUPHAR.LIGAND:3443	BARDOXOLONE METHYL	ncit:C98250	FALSE	FALSE	FALSE
CCND1	GuideToPharmacology	inhibitor	0.0781364	IUPHAR.LIGAND:3442	2-CHLORO-5-NITRO-N-PHENYLBENZAMIDE	drugbank:DB07863	FALSE	FALSE	FALSE
TGFB1	NCI	NULL	0.0773879	TRIAMCINOLONE	TRIAMCINOLONE	rxcui:10759	TRUE	FALSE	FALSE
CSNK1D	DTC	NULL	0.0769907	SB-220025	SB220025	drugbank:DB04338	FALSE	FALSE	FALSE
SMAD3	DTC	NULL	0.0764304	GNF-PF-5052	CHEMBL:CHEMBL601367	chembl:CHEMBL601367	FALSE	FALSE	FALSE
SMAD3	DTC	NULL	0.0764304	NSC-145669	CHEMBL:CHEMBL191611	chembl:CHEMBL191611	FALSE	FALSE	FALSE
SMAD3	DTC	NULL	0.0764304	DEMETHOXYCURCUMIN	DEMETHOXYCURCUMIN	chembl:CHEMBL179512	FALSE	FALSE	FALSE
SMAD3	DTC	NULL	0.0764304	JTC-801	JTC-801	iuphar.ligand:1692	FALSE	FALSE	FALSE
SMAD3	DTC	NULL	0.0764304	N-ACETYLCOLCHINOL	N-ACETYLCOLCHINOL	chembl:CHEMBL486504	FALSE	FALSE	FALSE
SMAD3	NCI	NULL	0.0764304	HALOFUGINONE	HALOFUGINONE	ncit:C1120	FALSE	FALSE	FALSE
SMAD3	DTC	NULL	0.0764304	GNF-PF-4579	CHEMBL:CHEMBL584626	chembl:CHEMBL584626	FALSE	FALSE	FALSE
SMAD3	DTC	NULL	0.0764304	SJ000150791	CHEMBL:CHEMBL600572	chembl:CHEMBL600572	FALSE	FALSE	FALSE
SMAD3	DTC	NULL	0.0764304	DNDI1417149	CHEMBL:CHEMBL1622802	chembl:CHEMBL1622802	FALSE	FALSE	FALSE
SMAD3	DTC	NULL	0.0764304	NSC-402538	CHEMBL:CHEMBL121556	chembl:CHEMBL121556	FALSE	FALSE	FALSE
SMAD3	DTC	NULL	0.0764304	SJ000200944	CHEMBL:CHEMBL600173	chembl:CHEMBL600173	FALSE	FALSE	FALSE
SMAD3	DTC	NULL	0.0764304	CARDAMOMIN	CARDAMOMIN	chembl:CHEMBL378104	FALSE	FALSE	FALSE
SMAD3	DTC	NULL	0.0764304	GNF-PF-3257	CHEMBL:CHEMBL601768	chembl:CHEMBL601768	FALSE	FALSE	FALSE
SMAD3	DTC	NULL	0.0764304	GNF-PF-4516	CHEMBL:CHEMBL586029	chembl:CHEMBL586029	FALSE	FALSE	FALSE
SMAD3	DTC	NULL	0.0764304	CINOBUFOTALIN	CINOBUFOTALIN	ncit:C151929	FALSE	FALSE	FALSE
SMAD3	DTC	NULL	0.0764304	NSC-172614	CHEMBL:CHEMBL1317506	chembl:CHEMBL1317506	FALSE	FALSE	FALSE
SMAD3	DTC	NULL	0.0764304	GNF-PF-130	CHEMBL:CHEMBL578890	chembl:CHEMBL578890	FALSE	FALSE	FALSE
SMAD3	DTC	NULL	0.0764304	TCMDC-124557	CHEMBL:CHEMBL530682	chembl:CHEMBL530682	FALSE	FALSE	FALSE
SMAD3	DTC	NULL	0.0764304	PERUVOSIDE	PERUVOSIDE	drugbank:DB13756	FALSE	FALSE	FALSE
SMAD3	DTC	NULL	0.0764304	FANGCHINOLINE	FANGCHINOLINE	chembl:CHEMBL504256	FALSE	FALSE	FALSE
CCN2	NCI	NULL	0.0762085	INSULIN	INSULIN, REGULAR, HUMAN	rxcui:253182	TRUE	FALSE	FALSE
GSK3B	DTC	NULL	0.0760981	CHIR-99021	LADUVIGLUSIB	ncit:C177060	FALSE	FALSE	FALSE
STK3	DTC	NULL	0.075011	LAUROGUADINE	LAUROGUADINE	ncit:C80857	FALSE	FALSE	FALSE
MYC	NCI	NULL	0.075011	PROTEASOME INHIBITOR	PROTEASOME INHIBITOR	ncit:C2160	FALSE	FALSE	FALSE
BIRC5	CIViC	NULL	0.0745848	PLATINUM COMPOUND	PLATINUM COMPOUND	ncit:C1450	FALSE	FALSE	TRUE
BIRC5	NCI	NULL	0.0745848	GM-CSF	GM-CSF	iuphar.ligand:4942	FALSE	FALSE	FALSE
NF2	CGI	NULL	0.0741634	Erlotinib	ERLOTINIB	rxcui:337525	TRUE	FALSE	TRUE
ITGB2	NCI	NULL	0.0729273	INDOMETHACIN	INDOMETHACIN	rxcui:5781	TRUE	FALSE	FALSE
CTNNB1	DTC	NULL	0.0723246	GNF-PF-1852	CHEMBL:CHEMBL533293	chembl:CHEMBL533293	FALSE	FALSE	FALSE
CTNNB1	JAX-CKB	NULL	0.0723246	Cabozantinib	CABOZANTINIB S-MALATE	rxcui:1363267	TRUE	FALSE	TRUE
APC	NCI	NULL	0.0723246	TRIIODOTHYRONINE	LIOTHYRONINE	rxcui:10814	TRUE	FALSE	FALSE
CCND1	NCI	NULL	0.0721259	TROGLITAZONE	TROGLITAZONE	rxcui:72610	TRUE	FALSE	FALSE
CCND1	GuideToPharmacology	agonist	0.0721259	IUPHAR.LIGAND:2693	TROGLITAZONE	rxcui:72610	TRUE	FALSE	FALSE
MYC	NCI	NULL	0.071439	SULINDAC	SULINDAC	rxcui:10237	TRUE	FALSE	TRUE
TGFB1	NCI	NULL	0.0711968	TCDD	TCDD	iuphar.ligand:9642	FALSE	FALSE	FALSE
BIRC5	NCI	NULL	0.0701974	NSAIDS	NONSTEROIDAL ANTIINFLAMMATORY DRUG	ncit:C257	FALSE	FALSE	FALSE
APC	GuideToPharmacology	agonist	0.0701974	IUPHAR.LIGAND:1713	ADENOSINE TRIPHOSPHATE	rxcui:318	TRUE	FALSE	FALSE
BMP7	PharmGKB	NULL	0.0700102	doxorubicin	DOXORUBICIN HYDROCHLORIDE	rxcui:142433	TRUE	FALSE	TRUE
CCND1	CIViC	NULL	0.0694546	RIBOCICLIB	RIBOCICLIB	rxcui:1873916	TRUE	FALSE	TRUE
CCND1	GuideToPharmacology	agonist	0.0694546	IUPHAR.LIGAND:2703	GW1929	iuphar.ligand:2703	FALSE	FALSE	FALSE
CCND1	ClearityFoundationBiomarkers	NULL	0.0694546	LEE011	RIBOCICLIB	rxcui:1873916	TRUE	FALSE	TRUE
BIRC2	GuideToPharmacology	inhibitor	0.069089	IUPHAR.LIGAND:1728	SURAMIN	rxcui:10256	FALSE	FALSE	FALSE
BIRC5	NCI	NULL	0.0688475	ARSENIC TRIOXIDE	ARSENIC TRIOXIDE	rxcui:18330	TRUE	FALSE	TRUE
TGFB1	NCI	NULL	0.0684585	EMODIN	EMODIN	ncit:C466	FALSE	FALSE	FALSE
TGFB1	NCI	NULL	0.0684585	H2O2	H2O2	iuphar.ligand:2448	FALSE	FALSE	FALSE
TGFB1	NCI	NULL	0.0684585	4-HPR	FENRETINIDE	ncit:C1098	TRUE	FALSE	FALSE
CTNNB1	CGI	NULL	0.0681918	Everolimus	EVEROLIMUS	rxcui:141704	TRUE	TRUE	TRUE
CTNNB1	JAX-CKB	NULL	0.0681918	Everolimus	EVEROLIMUS	rxcui:141704	TRUE	TRUE	TRUE
ITGB2	NCI	NULL	0.0678394	PREDNISONE	PREDNISONE	rxcui:8640	TRUE	FALSE	FALSE
STK3	DTC	NULL	0.0677518	SB-220025	SB220025	drugbank:DB04338	FALSE	FALSE	FALSE
SERPINE1	NCI	NULL	0.0671454	HYDROCHLOROTHIAZIDE	HYDROCHLOROTHIAZIDE	rxcui:5487	TRUE	FALSE	FALSE
GSK3B	DTC	NULL	0.0671454	BMS-387032	BMS-387032	iuphar.ligand:5670	FALSE	FALSE	FALSE
PRKCI	MyCancerGenome	inhibitor	0.0664654	SOPHORETIN	QUERCETIN	rxcui:9060	TRUE	FALSE	TRUE
PRKCZ	DTC	NULL	0.0662976	PHA-767491	PHA-767491	drugbank:DB17043	FALSE	FALSE	FALSE
BIRC5	NCI	NULL	0.0662976	DHEA	PRASTERONE	rxcui:3143	TRUE	FALSE	FALSE
BIRC5	NCI	NULL	0.0662976	INTERLEUKIN-1	RECOMBINANT INTERLEUKIN-1	ncit:C586	FALSE	FALSE	FALSE
TP73	NCI	NULL	0.0658403	CDDP	CISPLATIN	rxcui:2555	TRUE	FALSE	TRUE
GSK3B	PharmGKB	NULL	0.0652269	citalopram	CITALOPRAM	rxcui:2556	TRUE	FALSE	FALSE
CCND1	ClearityFoundationBiomarkers	NULL	0.0637848	PD 0332991	PALBOCICLIB	rxcui:1601374	TRUE	FALSE	TRUE
CCND1	ChEMBL	inhibitor	0.0637848	PALBOCICLIB	PALBOCICLIB	rxcui:1601374	TRUE	FALSE	TRUE
CCND1	DTC	NULL	0.0637848	PALBOCICLIB	PALBOCICLIB	rxcui:1601374	TRUE	FALSE	TRUE
CCND1	CGI	NULL	0.0637848	Palbociclib	PALBOCICLIB	rxcui:1601374	TRUE	FALSE	TRUE
APC	JAX-CKB	NULL	0.0628082	Sirolimus	SIROLIMUS	rxcui:35302	TRUE	TRUE	TRUE
MYC	ClearityFoundationBiomarkers	NULL	0.0625091	DINACICLIB	DINACICLIB	ncit:C78854	FALSE	FALSE	TRUE
MYC	NCI	NULL	0.0625091	THROMBIN	THROMBIN	rxcui:10528	TRUE	FALSE	FALSE
MYC	NCI	NULL	0.0625091	FOLIC ACID	FOLIC ACID	rxcui:4511	TRUE	FALSE	FALSE
TGFB1	NCI	NULL	0.0613766	MELATONIN	MELATONIN	rxcui:6711	TRUE	FALSE	FALSE
CCN2	NCI	NULL	0.0611978	CURCUMIN	CURCUMIN	rxcui:2955	TRUE	FALSE	FALSE
CTNNB1	DTC	NULL	0.0611978	DITHIAZANINE IODIDE	DITHIAZANINE IODIDE	ncit:C75216	FALSE	FALSE	FALSE
CTNNB1	GuideToPharmacology	inhibitor	0.0611978	IUPHAR.LIGAND:7907	7-HYDROXYSTAUROSPORINE	iuphar.ligand:7907	FALSE	FALSE	FALSE
APC	JAX-CKB	NULL	0.0611978	Ibuprofen	IBUPROFEN, SODIUM SALT	rxcui:1429044	TRUE	FALSE	TRUE
MYC	NCI	NULL	0.0600088	PROTOPORPHYRIN	PROTOPORPHYRIN	drugbank:DB02285	FALSE	FALSE	FALSE
PRKCZ	DTC	NULL	0.0599403	TOZASERTIB	TOZASERTIB	ncit:C98053	FALSE	FALSE	TRUE
BIRC5	NCI	NULL	0.0596678	PROTEASOME INHIBITOR	PROTEASOME INHIBITOR	ncit:C2160	FALSE	FALSE	FALSE
BIRC5	NCI	NULL	0.0596678	UCN-01	UCN-01	chembl:CHEMBL574737	FALSE	FALSE	FALSE
BIRC5	NCI	NULL	0.0596678	FLUTAMIDE	FLUTAMIDE	rxcui:4508	TRUE	FALSE	TRUE
SERPINE1	PharmGKB	NULL	0.0593978	antidepressants	ANTIDEPRESSANT AGENT	ncit:C265	FALSE	FALSE	FALSE
MYC	NCI	NULL	0.0577007	TROGLITAZONE	TROGLITAZONE	rxcui:72610	TRUE	FALSE	FALSE
TGFB1	NCI	NULL	0.0574168	RETINOID	RETINOIC ACID AGENT	ncit:C804	FALSE	FALSE	FALSE
SMAD3	DTC	NULL	0.0573228	ANGUIDIN	ANGUIDIN	chembl:CHEMBL433680	FALSE	FALSE	FALSE
SMAD3	DTC	NULL	0.0573228	GITOXIGENIN	GITOXIGENIN	chembl:CHEMBL464658	FALSE	FALSE	FALSE
SMAD3	DTC	NULL	0.0573228	GERONTOXANTHONE I	GERONTOXANTHONE I	chembl:CHEMBL478791	FALSE	FALSE	FALSE
SMAD3	DTC	NULL	0.0573228	N,N'-DIPHENYL-GUANIDINE	CHEMBL:CHEMBL77675	chembl:CHEMBL77675	FALSE	FALSE	FALSE
SMAD3	DTC	NULL	0.0573228	GNF-PF-2356	CHEMBL:CHEMBL601547	chembl:CHEMBL601547	FALSE	FALSE	FALSE
SMAD3	DTC	NULL	0.0573228	SJ000117447	CHEMBL:CHEMBL592611	chembl:CHEMBL592611	FALSE	FALSE	FALSE
SMAD3	DTC	NULL	0.0573228	GNF-PF-2713	CHEMBL:CHEMBL578719	chembl:CHEMBL578719	FALSE	FALSE	FALSE
SMAD3	DTC	NULL	0.0573228	CHLORQUINALDOL	CHLORQUINALDOL	rxcui:2407	TRUE	FALSE	FALSE
SMAD3	DTC	NULL	0.0573228	BUFOGENIN	BUFOGENIN	ncit:C77829	FALSE	FALSE	FALSE
SMAD3	DTC	NULL	0.0573228	DNDI1417006	CHEMBL:CHEMBL1415258	chembl:CHEMBL1415258	FALSE	FALSE	FALSE
SMAD3	DTC	NULL	0.0573228	ENNIATIN B	ENNIATIN B	chembl:CHEMBL469036	FALSE	FALSE	FALSE
SMAD3	DTC	NULL	0.0573228	RESACTIN A	RESACTIN A	chembl:CHEMBL509617	FALSE	FALSE	FALSE
SMAD3	DTC	NULL	0.0573228	AROMATICIN	AROMATICIN	chembl:CHEMBL494255	FALSE	FALSE	FALSE
SMAD3	DTC	NULL	0.0573228	SJ000201788	CHEMBL:CHEMBL602923	chembl:CHEMBL602923	FALSE	FALSE	FALSE
SMAD3	DTC	NULL	0.0573228	NSC-50688	CHEMBL:CHEMBL1456848	chembl:CHEMBL1456848	FALSE	FALSE	FALSE
SMAD3	DTC	NULL	0.0573228	TCMDC-125653	CHEMBL:CHEMBL580918	chembl:CHEMBL580918	FALSE	FALSE	FALSE
SMAD3	DTC	NULL	0.0573228	TCMDC-124354	CHEMBL:CHEMBL546344	chembl:CHEMBL546344	FALSE	FALSE	FALSE
SMAD3	DTC	NULL	0.0573228	DNDI1417722	CHEMBL:CHEMBL1503190	chembl:CHEMBL1503190	FALSE	FALSE	FALSE
SMAD3	DTC	NULL	0.0573228	GNF-PF-3792	CHEMBL:CHEMBL582983	chembl:CHEMBL582983	FALSE	FALSE	FALSE
SMAD3	DTC	NULL	0.0573228	GNF-PF-4325	CHEMBL:CHEMBL598263	chembl:CHEMBL598263	FALSE	FALSE	FALSE
SMAD3	DTC	NULL	0.0573228	GNF-PF-2094	CHEMBL:CHEMBL578928	chembl:CHEMBL578928	FALSE	FALSE	FALSE
SMAD3	DTC	NULL	0.0573228	GNF-PF-3515	GMQ	iuphar.ligand:4203	FALSE	FALSE	FALSE
SMAD3	DTC	NULL	0.0573228	GNF-PF-3418	CHEMBL:CHEMBL582099	chembl:CHEMBL582099	FALSE	FALSE	FALSE
SMAD3	DTC	NULL	0.0573228	DIGOXIGENIN	DIGOXIGENIN	drugbank:DB03671	FALSE	FALSE	FALSE
SMAD3	DTC	NULL	0.0573228	TUBERCIDIN	TUBERCIDIN	ncit:C911	FALSE	FALSE	FALSE
SMAD3	DTC	NULL	0.0573228	DNDI1417147	CHEMBL:CHEMBL2094484	chembl:CHEMBL2094484	FALSE	FALSE	FALSE
BIRC5	NCI	NULL	0.0568265	ANTIOXIDANT	ANTIOXIDANT	ncit:C275	FALSE	FALSE	FALSE
CTNNB1	PharmGKB	NULL	0.0568265	nirogacestat	NIROGACESTAT	rxcui:2670631	TRUE	FALSE	TRUE
PRKCZ	MyCancerGenome	inhibitor	0.0553878	SOPHORETIN	QUERCETIN	rxcui:9060	TRUE	FALSE	TRUE
BIRC5	NCI	NULL	0.0542435	MYCOPHENOLIC ACID	MYCOPHENOLATE	rxcui:265323	TRUE	TRUE	FALSE
TGFB1	NCI	NULL	0.053937	ANTISENSE OLIGONUCLEOTIDES	ANTISENSE OLIGONUCLEOTIDES	ncit:C1291	FALSE	FALSE	FALSE
STK3	DTC	NULL	0.053854	GW843682X	GW843682X	chembl:CHEMBL514499	FALSE	FALSE	FALSE
APC	JAX-CKB	NULL	0.0534339	Celecoxib	CELECOXIB	rxcui:140587	TRUE	FALSE	TRUE
STK3	DTC	inhibitor	0.0525077	HESPERADIN	HESPERADIN	rxcui:1552358	FALSE	FALSE	FALSE
CCND1	GuideToPharmacology	inhibitor	0.0520909	IUPHAR.LIGAND:2807	BEXAROTENE	rxcui:233272	TRUE	FALSE	TRUE
MYC	NCI	NULL	0.0517317	MELATONIN	MELATONIN	rxcui:6711	TRUE	FALSE	FALSE
STK3	DTC	NULL	0.051227	BAY-613606	BAY 61-3606	iuphar.ligand:9693	FALSE	FALSE	FALSE
ITGB2	NCI	NULL	0.0502947	CYCLOSPORINE	CYCLOSPORINE	rxcui:3008	TRUE	TRUE	FALSE
ITGB2	NCI	NULL	0.0502947	CSA	CYCLOSPORINE	rxcui:3008	TRUE	TRUE	FALSE
AFP	NCI	NULL	0.0498648	VINCRISTINE	VINCRISTINE	rxcui:11202	TRUE	FALSE	TRUE
NF2	CIViC	NULL	0.0497232	CARBOPLATIN	CARBOPLATIN	rxcui:40048	TRUE	FALSE	TRUE
TGFB1	NCI	NULL	0.0494423	ATENOLOL	ATENOLOL	rxcui:1202	TRUE	FALSE	FALSE
BIRC5	NCI	NULL	0.0487084	RESVERATROL	RESVERATROL	rxcui:1000492	TRUE	FALSE	FALSE
APC	JAX-CKB	NULL	0.0487084	Dactolisib	DACTOLISIB	ncit:C74072	FALSE	FALSE	TRUE
MYC	NCI	NULL	0.0483942	BROMOCRIPTINE	BROMOCRIPTINE	rxcui:1760	TRUE	FALSE	FALSE
ITGB2	NCI	NULL	0.0480839	RETINOIC ACID	TRETINOIN	rxcui:10753	TRUE	FALSE	TRUE
STK3	DTC	NULL	0.0477342	681640	CHEMBL:CHEMBL379975	chembl:CHEMBL379975	FALSE	FALSE	FALSE
APC	JAX-CKB	NULL	0.0477342	Trametinib	TRAMETINIB DIMETHYL SULFOXIDE	rxcui:1425098	TRUE	FALSE	TRUE
STK3	DTC	NULL	0.0471979	SP-600125	SP-600125	chembl:CHEMBL1725279	FALSE	FALSE	FALSE
CSNK1D	DTC	NULL	0.0458983	ALSTERPAULLONE	ALSTERPAULLONE	drugbank:DB04014	FALSE	FALSE	FALSE
SMAD3	DTC	NULL	0.0458582	DNDI1417165	CHEMBL:CHEMBL1406948	chembl:CHEMBL1406948	FALSE	FALSE	FALSE
SMAD3	DTC	NULL	0.0458582	FLUAZINAM	FLUAZINAM	chembl:CHEMBL1878267	FALSE	FALSE	FALSE
SMAD3	DTC	NULL	0.0458582	NSC-724440	CHEMBL:CHEMBL515617	chembl:CHEMBL515617	FALSE	FALSE	FALSE
SMAD3	DTC	NULL	0.0458582	TCMDC-123808	CHEMBL:CHEMBL546493	chembl:CHEMBL546493	FALSE	FALSE	FALSE
SMAD3	DTC	NULL	0.0458582	DNDI1417457	CHEMBL:CHEMBL1530911	chembl:CHEMBL1530911	FALSE	FALSE	FALSE
SMAD3	DTC	NULL	0.0458582	SJ000173328	CHEMBL:CHEMBL591613	chembl:CHEMBL591613	FALSE	FALSE	FALSE
SMAD3	DTC	NULL	0.0458582	MMV666022	CHEMBL:CHEMBL599100	chembl:CHEMBL599100	FALSE	FALSE	FALSE
SMAD3	DTC	NULL	0.0458582	LOPINAVIR	LOPINAVIR	rxcui:195088	TRUE	FALSE	FALSE
SMAD3	DTC	NULL	0.0458582	TCMDC-138263	CHEMBL:CHEMBL535307	chembl:CHEMBL535307	FALSE	FALSE	FALSE
SMAD3	NCI	NULL	0.0458582	LEUPROLIDE ACETATE	LEUPROLIDE ACETATE	rxcui:203217	TRUE	FALSE	TRUE
SMAD3	DTC	NULL	0.0458582	TCMDC-124573	CHEMBL:CHEMBL525826	chembl:CHEMBL525826	FALSE	FALSE	FALSE
SMAD3	DTC	NULL	0.0458582	OXYQUINOLINE	OXYQUINOLINE	rxcui:110	TRUE	FALSE	FALSE
SMAD3	DTC	NULL	0.0458582	ANISOMYCIN	ANISOMYCIN	ncit:C95312	FALSE	FALSE	FALSE
SMAD3	DTC	NULL	0.0458582	SJ000089001	CHEMBL:CHEMBL591618	chembl:CHEMBL591618	FALSE	FALSE	FALSE
SMAD3	DTC	NULL	0.0458582	ENPIROLINE	ENPIROLINE	ncit:C75267	FALSE	FALSE	FALSE
SMAD3	DTC	NULL	0.0458582	TCMDC-125142	CHEMBL:CHEMBL528791	chembl:CHEMBL528791	FALSE	FALSE	FALSE
SMAD3	DTC	NULL	0.0458582	OSAJIN	OSAJIN	chembl:CHEMBL238188	FALSE	FALSE	FALSE
SMAD3	DTC	NULL	0.0458582	DNDI1416975	CHEMBL:CHEMBL1415851	chembl:CHEMBL1415851	FALSE	FALSE	FALSE
TGFB1	NCI	NULL	0.045639	TESTOSTERONE	TESTOSTERONE	rxcui:10379	TRUE	FALSE	FALSE
MYC	NCI	NULL	0.0454612	6-TG	THIOGUANINE	rxcui:10485	TRUE	FALSE	TRUE
MYC	PharmGKB	NULL	0.0454612	warfarin	WARFARIN	rxcui:11289	TRUE	FALSE	FALSE
MYC	NCI	NULL	0.0454612	DES	DIETHYLSTILBESTROL	rxcui:3390	TRUE	FALSE	FALSE
PRKCI	DTC	NULL	0.0452652	ILORASERTIB	ILORASERTIB	ncit:C116729	FALSE	FALSE	TRUE
PRKCI	DTC	NULL	0.044498	CENISERTIB	CENISERTIB	ncit:C64540	FALSE	FALSE	TRUE
CTNNB1	JAX-CKB	NULL	0.0441984	Cetuximab	CETUXIMAB	rxcui:318341	TRUE	TRUE	TRUE
CTNNB1	GuideToPharmacology	inhibitor	0.0441984	IUPHAR.LIGAND:9917	PEXMETINIB	ncit:C85481	FALSE	FALSE	FALSE
CTNNB1	CGI	NULL	0.0441984	Letrozole	LETROZOLE	rxcui:72965	TRUE	FALSE	TRUE
GSK3B	ChEMBL	inhibitor	0.0439027	LY-2090314	LY-2090314	drugbank:DB11913	FALSE	FALSE	FALSE
STK3	DTC	NULL	0.0437564	KENPAULLONE	KENPAULLONE	iuphar.ligand:6000	FALSE	FALSE	FALSE
CTNNB1	PharmGKB	NULL	0.0430038	thalidomide	THALIDOMIDE	rxcui:10432	TRUE	TRUE	TRUE
BIRC5	NCI	NULL	0.0426199	FR901228	ROMIDEPSIN	rxcui:877510	TRUE	FALSE	TRUE
BIRC5	NCI	NULL	0.0426199	STAUROSPORINE	STAUROSPORINE	ncit:C1237	FALSE	FALSE	FALSE
TGFB1	NCI	NULL	0.0423791	CORTISOL	HYDROCORTISONE BUTYRATE	rxcui:103468	TRUE	FALSE	FALSE
APC	JAX-CKB	NULL	0.0411502	Vandetanib	VANDETANIB	rxcui:1098413	TRUE	FALSE	TRUE
MYC	NCI	NULL	0.0405465	PD-98059	PD-98059	drugbank:DB17042	FALSE	FALSE	FALSE
APC	JAX-CKB	NULL	0.0404528	Erlotinib	ERLOTINIB	rxcui:337525	TRUE	FALSE	TRUE
STK3	DTC	NULL	0.0403905	PD-0166285	PD-0166285	chembl:CHEMBL3545196	FALSE	FALSE	FALSE
STK3	DTC	NULL	0.0403905	ALSTERPAULLONE	ALSTERPAULLONE	drugbank:DB04014	FALSE	FALSE	FALSE
CCND1	PharmGKB	NULL	0.0403285	lapatinib	LAPATINIB	rxcui:480167	TRUE	FALSE	TRUE
BIRC5	CIViC	NULL	0.0397785	TRASTUZUMAB	RITUXIMAB	rxcui:121191	TRUE	TRUE	TRUE
BIRC5	NCI	NULL	0.0397785	TRASTUZUMAB	RITUXIMAB	rxcui:121191	TRUE	TRUE	TRUE
TGFB1	PharmGKB	NULL	0.0395538	rituximab	RITUXIMAB	rxcui:121191	TRUE	TRUE	TRUE
MYC	PharmGKB	NULL	0.0394795	polatuzumab vedotin	POLATUZUMAB VEDOTIN	rxcui:2174090	TRUE	FALSE	FALSE
GSK3B	DTC	NULL	0.0393611	SB-203580	SB203580	iuphar.ligand:5269	FALSE	FALSE	FALSE
TGFB1	NCI	NULL	0.0386939	NICOTINE	NICOTINE POLACRILEX	rxcui:31765	TRUE	FALSE	FALSE
TGFB1	NCI	NULL	0.0386939	STREPTOZOTOCIN	STREPTOZOCIN	rxcui:10114	TRUE	FALSE	FALSE
BIRC5	NCI	NULL	0.0384954	GW572016	LAPATINIB	rxcui:480167	TRUE	FALSE	TRUE
MYC	NCI	NULL	0.0384672	IFN	RECOMBINANT INTERFERON	ncit:C584	FALSE	FALSE	FALSE
CCND1	CIViC	NULL	0.0384672	TAMOXIFEN	TAMOXIFEN	rxcui:10324	TRUE	FALSE	TRUE
CCND1	NCI	NULL	0.0384672	TAMOXIFEN	TAMOXIFEN	rxcui:10324	TRUE	FALSE	TRUE
SMAD3	DTC	NULL	0.0382152	TRICLOSAN	TRICLOSAN	rxcui:10795	TRUE	FALSE	FALSE
SMAD3	DTC	NULL	0.0382152	GNF-PF-1295	CHEMBL:CHEMBL579837	chembl:CHEMBL579837	FALSE	FALSE	FALSE
SMAD3	DTC	NULL	0.0382152	TCMDC-123927	CHEMBL:CHEMBL531268	chembl:CHEMBL531268	FALSE	FALSE	FALSE
SMAD3	DTC	NULL	0.0382152	GNF-PF-3286	CHEMBL:CHEMBL581880	chembl:CHEMBL581880	FALSE	FALSE	FALSE
SMAD3	DTC	NULL	0.0382152	THIOINOSINE	THIOINOSINE	ncit:C877	FALSE	FALSE	FALSE
SMAD3	DTC	NULL	0.0382152	1-O-ACETYLGEOPYXIN A	CHEMBL:CHEMBL1902074	chembl:CHEMBL1902074	FALSE	FALSE	FALSE
SMAD3	DTC	NULL	0.0382152	MK-2206	MK-2206	drugbank:DB16828	FALSE	FALSE	TRUE
SMAD3	DTC	NULL	0.0382152	GNF-PF-2954	CHEMBL:CHEMBL582722	chembl:CHEMBL582722	FALSE	FALSE	FALSE
SMAD3	DTC	NULL	0.0382152	NSC-695801	CHEMBL:CHEMBL461193	chembl:CHEMBL461193	FALSE	FALSE	FALSE
SMAD3	DTC	NULL	0.0382152	FIDUXOSIN HYDROCHLORIDE	FIDUXOSIN HYDROCHLORIDE	ncit:C81371	FALSE	FALSE	FALSE
SMAD3	NCI	NULL	0.0382152	ENZYME INHIBITOR	ENZYME INHIBITOR	ncit:C471	FALSE	FALSE	FALSE
SMAD3	DTC	NULL	0.0382152	TCMDC-125814	CHEMBL:CHEMBL533082	chembl:CHEMBL533082	FALSE	FALSE	FALSE
SMAD3	DTC	NULL	0.0382152	GERONTOXANTHONE H	GERONTOXANTHONE H	chembl:CHEMBL514057	FALSE	FALSE	FALSE
SMAD3	DTC	NULL	0.0382152	CGP-60474	CHEMBL:CHEMBL300389	chembl:CHEMBL300389	FALSE	FALSE	FALSE
SMAD3	DTC	NULL	0.0382152	NSC-367089	CHEMBL:CHEMBL1543865	chembl:CHEMBL1543865	FALSE	FALSE	FALSE
SMAD3	DTC	NULL	0.0382152	EMETINE HYDROCHLORIDE	EMETINE HYDROCHLORIDE	rxcui:82015	FALSE	FALSE	FALSE
SMAD3	DTC	NULL	0.0382152	DNDI1417447	CHEMBL:CHEMBL1307453	chembl:CHEMBL1307453	FALSE	FALSE	FALSE
SMAD3	DTC	NULL	0.0382152	GNF-PF-2947	CHEMBL:CHEMBL581677	chembl:CHEMBL581677	FALSE	FALSE	FALSE
SMAD3	DTC	NULL	0.0382152	GNF-PF-4798	CHEMBL:CHEMBL584635	chembl:CHEMBL584635	FALSE	FALSE	FALSE
SMAD3	DTC	NULL	0.0382152	GNF-PF-2776	CHEMBL:CHEMBL578294	chembl:CHEMBL578294	FALSE	FALSE	FALSE
SMAD3	DTC	NULL	0.0382152	STROPHANTHIDIN	STROPHANTHIDIN	chembl:CHEMBL111743	FALSE	FALSE	FALSE
SMAD3	DTC	NULL	0.0382152	DNDI1417420	CHEMBL:CHEMBL1546223	chembl:CHEMBL1546223	FALSE	FALSE	FALSE
SMAD3	DTC	NULL	0.0382152	DITHIAZANINE	DITHIAZANINE	ncit:C72743	FALSE	FALSE	FALSE
STK3	DTC	NULL	0.0381874	JNJ-7706621	JNJ-7706621	iuphar.ligand:5932	FALSE	FALSE	FALSE
STK3	DTC	NULL	0.0381874	CEDIRANIB	CEDIRANIB	ncit:C80867	FALSE	FALSE	TRUE
TGFB1	NCI	NULL	0.0378707	17 BETA-ESTRADIOL	ESTRADIOL VALERATE	rxcui:24395	TRUE	FALSE	FALSE
MYC	CGI	NULL	0.0375055	Temozolomide	TEMOZOLOMIDE	rxcui:37776	TRUE	FALSE	TRUE
MYC	NCI	NULL	0.0375055	INDOMETHACIN	INDOMETHACIN	rxcui:5781	TRUE	FALSE	FALSE
MYC	NCI	NULL	0.0375055	5-AZACYTIDINE	AZACITIDINE	rxcui:1251	TRUE	FALSE	TRUE
PRKCZ	DTC	NULL	0.0370817	CENISERTIB	CENISERTIB	ncit:C64540	FALSE	FALSE	TRUE
TGFB1	NCI	NULL	0.0370817	GOSSYPOL	GOSSYPOL	ncit:C529	FALSE	FALSE	FALSE
ACTG1	PharmGKB	NULL	0.0370424	vincristine	VINCRISTINE	rxcui:11202	TRUE	FALSE	TRUE
ITGB2	NCI	NULL	0.0369252	ETHANOL	DEHYDRATED ALCOHOL	rxcui:1310469	TRUE	FALSE	FALSE
STK3	DTC	NULL	0.0368475	ENTRECTINIB	ENTRECTINIB	rxcui:2197862	TRUE	FALSE	TRUE
CCND1	GuideToPharmacology	agonist	0.0367701	IUPHAR.LIGAND:2694	PIOGLITAZONE HYDROCHLORIDE	rxcui:259319	TRUE	FALSE	FALSE
CSNK1D	DTC	NULL	0.0367187	GW441756X	GW441756X	chembl:CHEMBL1516890	FALSE	FALSE	FALSE
ACTB	NCI	NULL	0.0365907	CYCLOPHOSPHAMIDE	CYCLOPHOSPHAMIDE ANHYDROUS	rxcui:1545988	TRUE	FALSE	FALSE
CSNK1D	DTC	NULL	0.0361623	PHA-767491	PHA-767491	drugbank:DB17043	FALSE	FALSE	FALSE
AFP	NCI	NULL	0.036063	METHOTREXATE	METHOTREXATE	rxcui:6851	TRUE	FALSE	TRUE
SERPINE1	PharmGKB	NULL	0.035915	dexamethasone	DEXAMETHASONE	rxcui:3264	TRUE	FALSE	TRUE
MYC	NCI	NULL	0.0357195	LITHIUM	LITHIUM	rxcui:6448	TRUE	FALSE	FALSE
GSK3B	DTC	NULL	0.035671	TCMDC-125758	CHEMBL:CHEMBL546797	chembl:CHEMBL546797	FALSE	FALSE	FALSE
ITGB2	NCI	NULL	0.0355743	CYCLOPHOSPHAMIDE	CYCLOPHOSPHAMIDE ANHYDROUS	rxcui:1545988	TRUE	FALSE	FALSE
CSNK1D	DTC	NULL	0.0350987	GEFITINIB	GEFITINIB	rxcui:328134	TRUE	FALSE	TRUE
BIRC5	NCI	NULL	0.0350987	EPO	EPOETIN ALFA	rxcui:105694	TRUE	FALSE	FALSE
MYC	NCI	NULL	0.0348888	PRED	PREDNISONE	rxcui:8640	TRUE	FALSE	FALSE
CCND1	GuideToPharmacology	agonist	0.0347273	IUPHAR.LIGAND:3322	ZAFIRLUKAST	rxcui:114970	TRUE	FALSE	FALSE
CTNNB1	GuideToPharmacology	inhibitor	0.03459	IUPHAR.LIGAND:5668	DORAMAPIMOD	ncit:C76770	FALSE	FALSE	FALSE
STK3	DTC	NULL	0.0344313	SOTRASTAURIN	SOTRASTAURIN	ncit:C80630	FALSE	FALSE	FALSE
BIRC5	NCI	NULL	0.0340959	ACTINOMYCIN D	DACTINOMYCIN	rxcui:3100	TRUE	FALSE	FALSE
BIRC5	NCI	NULL	0.0340959	CAMPTOTHECIN	CAMPTOTHECIN	ncit:C338	TRUE	FALSE	TRUE
MYC	NCI	NULL	0.0333382	VERAPAMIL	VERAPAMIL	rxcui:11170	TRUE	FALSE	TRUE
BIRC5	NCI	NULL	0.0331488	EPIRUBICIN	EPIRUBICIN	rxcui:3995	TRUE	FALSE	TRUE
CCND1	ClearityFoundationBiomarkers	NULL	0.0328995	LY2835219	ABEMACICLIB	rxcui:1946825	TRUE	FALSE	TRUE
SMAD3	DTC	NULL	0.0327559	BREFELDIN A	BREFELDIN A	drugbank:DB07348	FALSE	FALSE	FALSE
SMAD3	DTC	NULL	0.0327559	SJ000001516	CHEMBL:CHEMBL592316	chembl:CHEMBL592316	FALSE	FALSE	FALSE
SMAD3	DTC	NULL	0.0327559	GNF-PF-1134	CHEMBL:CHEMBL600694	chembl:CHEMBL600694	FALSE	FALSE	FALSE
SMAD3	DTC	NULL	0.0327559	TCMDC-125784	CHEMBL:CHEMBL581574	chembl:CHEMBL581574	FALSE	FALSE	FALSE
SMAD3	DTC	NULL	0.0327559	CUCURBITACIN B	CUCURBITACIN B	iuphar.ligand:12432	FALSE	FALSE	FALSE
SMAD3	DTC	NULL	0.0327559	CLIOXANIDE	CLIOXANIDE	ncit:C65338	FALSE	FALSE	FALSE
SMAD3	DTC	NULL	0.0327559	TRICLOCARBAN	TRICLOCARBAN	rxcui:38609	FALSE	FALSE	FALSE
SMAD3	DTC	NULL	0.0327559	DNDI1417099	CHEMBL:CHEMBL1565444	chembl:CHEMBL1565444	FALSE	FALSE	FALSE
SMAD3	DTC	NULL	0.0327559	EPIRUBICIN HYDROCHLORIDE	EPIRUBICIN HYDROCHLORIDE	rxcui:203213	TRUE	FALSE	FALSE
SMAD3	DTC	NULL	0.0327559	GNF-PF-2335	CHEMBL:CHEMBL601146	chembl:CHEMBL601146	FALSE	FALSE	FALSE
SMAD3	DTC	NULL	0.0327559	TCMDC-124317	CHEMBL:CHEMBL586937	chembl:CHEMBL586937	FALSE	FALSE	FALSE
SMAD3	DTC	NULL	0.0327559	GNF-PF-3201	CHEMBL:CHEMBL581872	chembl:CHEMBL581872	FALSE	FALSE	FALSE
SMAD3	DTC	NULL	0.0327559	GNF-PF-1319	CHEMBL:CHEMBL235891	chembl:CHEMBL235891	FALSE	FALSE	FALSE
SMAD3	DTC	NULL	0.0327559	SJ000147784	CHEMBL:CHEMBL590186	chembl:CHEMBL590186	FALSE	FALSE	FALSE
MYC	NCI	NULL	0.0326135	PMA	TETRADECANOYLPHORBOL ACETATE	ncit:C866	FALSE	FALSE	FALSE
STK3	DTC	NULL	0.0323124	GW441756X	GW441756X	chembl:CHEMBL1516890	FALSE	FALSE	FALSE
BIRC5	NCI	NULL	0.0322529	PD-98059	PD-98059	drugbank:DB17042	FALSE	FALSE	FALSE
CTNNB1	JAX-CKB	NULL	0.0318228	Trametinib	TRAMETINIB DIMETHYL SULFOXIDE	rxcui:1425098	TRUE	FALSE	TRUE
APC	GuideToPharmacology	inhibitor	0.0314041	IUPHAR.LIGAND:1728	SURAMIN	rxcui:10256	FALSE	FALSE	FALSE
CCND1	DTC	NULL	0.0312546	ALVOCIDIB	ALVOCIDIB	ncit:C74940	FALSE	FALSE	TRUE
APC	JAX-CKB	NULL	0.0309963	Dasatinib	DASATINIB ANHYDROUS	rxcui:1546019	TRUE	FALSE	TRUE
TGFB1	NCI	NULL	0.0306883	GENISTEIN	GENISTEIN	rxcui:25696	TRUE	FALSE	FALSE
SMAD3	NCI	NULL	0.0305722	ANTIESTROGEN	ANTIESTROGEN	ncit:C481	FALSE	FALSE	FALSE
NF2	CIViC	NULL	0.0301768	CISPLATIN	CISPLATIN	rxcui:2555	TRUE	FALSE	TRUE
TGFB1	NCI	NULL	0.0301682	ETOPOSIDE	ETOPOSIDE	rxcui:4179	TRUE	FALSE	TRUE
CSNK1D	DTC	NULL	0.0298339	LINIFANIB	LINIFANIB	ncit:C71759	FALSE	FALSE	TRUE
BIRC5	NCI	NULL	0.0298339	INDOMETHACIN	INDOMETHACIN	rxcui:5781	TRUE	FALSE	FALSE
GSK3B	DTC	NULL	0.0292685	GW843682X	GW843682X	chembl:CHEMBL514499	FALSE	FALSE	FALSE
SMAD3	DTC	NULL	0.0286614	NSC-377852	CHEMBL:CHEMBL1466186	chembl:CHEMBL1466186	FALSE	FALSE	FALSE
SMAD3	DTC	NULL	0.0286614	KAMEBANIN	KAMEBANIN	chembl:CHEMBL472437	FALSE	FALSE	FALSE
SMAD3	DTC	NULL	0.0286614	BIX-01294	BIX-01294	iuphar.ligand:7014	FALSE	FALSE	FALSE
SMAD3	DTC	NULL	0.0286614	PYRIDINE-2-CARBOTHIOIC ACID PHENYLAMIDE	CHEMBL:CHEMBL114544	chembl:CHEMBL114544	FALSE	FALSE	FALSE
SMAD3	DTC	NULL	0.0286614	2-METHOXY-1,4-NAPHTHOQUINONE	2-METHOXY-1,4-NAPHTHOQUINONE	chembl:CHEMBL106562	FALSE	FALSE	FALSE
SMAD3	DTC	NULL	0.0286614	MITONAFIDE	MITONAFIDE	ncit:C66165	FALSE	FALSE	FALSE
SMAD3	DTC	NULL	0.0286614	MMV009085	CHEMBL:CHEMBL581225	chembl:CHEMBL581225	FALSE	FALSE	FALSE
SMAD3	DTC	NULL	0.0286614	GNF-PF-3407	CHEMBL:CHEMBL602990	chembl:CHEMBL602990	FALSE	FALSE	FALSE
SMAD3	DTC	NULL	0.0286614	TCMDC-123650	CHEMBL:CHEMBL580727	chembl:CHEMBL580727	FALSE	FALSE	FALSE
SMAD3	DTC	NULL	0.0286614	BISINDOLYLMALEIMIDE IX	RO31-8220	iuphar.ligand:5259	FALSE	FALSE	FALSE
SMAD3	DTC	NULL	0.0286614	4-AMINOPHENOL	4-AMINOPHENOL	rxcui:1435279	TRUE	FALSE	FALSE
SMAD3	DTC	NULL	0.0286614	CID 663143	CHEMBL:CHEMBL1342336	chembl:CHEMBL1342336	FALSE	FALSE	FALSE
SMAD3	DTC	NULL	0.0286614	GNF-PF-3641	CHEMBL:CHEMBL599098	chembl:CHEMBL599098	FALSE	FALSE	FALSE
AFP	NCI	NULL	0.0286458	ASPIRIN	ASPIRIN	rxcui:1191	TRUE	FALSE	TRUE
CCND1	GuideToPharmacology	agonist	0.0284132	IUPHAR.LIGAND:1056	ROSIGLITAZONE	rxcui:84108	TRUE	FALSE	FALSE
CCND1	GuideToPharmacology	agonist	0.0284132	IUPHAR.LIGAND:2700	MESALAMINE	rxcui:52582	TRUE	FALSE	FALSE
TGFB1	PharmGKB	NULL	0.0282527	irinotecan	IRINOTECAN HYDROCHLORIDE	rxcui:153329	TRUE	FALSE	TRUE
GSK3B	DTC	NULL	0.0278408	BAY-613606	BAY 61-3606	iuphar.ligand:9693	FALSE	FALSE	FALSE
CTNNB1	GuideToPharmacology	inhibitor	0.0274335	IUPHAR.LIGAND:5269	SB203580	iuphar.ligand:5269	FALSE	FALSE	FALSE
TGFB1	NCI	NULL	0.0273834	TAMOXIFEN	TAMOXIFEN	rxcui:10324	TRUE	FALSE	TRUE
MYC	NCI	NULL	0.0272767	SAHA	VORINOSTAT	rxcui:194337	TRUE	FALSE	TRUE
AFP	NCI	NULL	0.026927	DOXORUBICIN	DOXORUBICIN HYDROCHLORIDE	rxcui:142433	TRUE	FALSE	TRUE
CSNK1D	DTC	NULL	0.026817	SP-600125	SP-600125	chembl:CHEMBL1725279	FALSE	FALSE	FALSE
MYC	ClearityFoundationBiomarkers	NULL	0.0267896	BAY1000394	RONICICLIB	ncit:C92579	FALSE	FALSE	TRUE
GSK3B	DTC	NULL	0.0265458	GO-6976	GO-6976	drugbank:DB17029	FALSE	FALSE	FALSE
BIRC5	NCI	NULL	0.0262276	ALL-TRANS-RETINOIC ACID	TRETINOIN	rxcui:10753	TRUE	FALSE	TRUE
BIRC5	NCI	NULL	0.0262276	ATRA	TRETINOIN	rxcui:10753	TRUE	FALSE	TRUE
CCND1	NCI	NULL	0.0260455	GOSSYPOL	GOSSYPOL	ncit:C529	FALSE	FALSE	FALSE
BIRC5	NCI	NULL	0.0259425	PMA	TETRADECANOYLPHORBOL ACETATE	ncit:C866	FALSE	FALSE	FALSE
GSK3B	DTC	NULL	0.0259425	681640	CHEMBL:CHEMBL379975	chembl:CHEMBL379975	FALSE	FALSE	FALSE
GSK3B	DTC	NULL	0.0259425	GSK-269962A	GSK-269962A	drugbank:DB17030	FALSE	FALSE	FALSE
CTNNB1	GuideToPharmacology	inhibitor	0.0256636	IUPHAR.LIGAND:6038	SB220025	drugbank:DB04338	FALSE	FALSE	FALSE
SMAD3	DTC	NULL	0.0254768	DNDI1416955	CHEMBL:CHEMBL1327172	chembl:CHEMBL1327172	FALSE	FALSE	FALSE
SMAD3	DTC	NULL	0.0254768	LASALOCID A SODIUM	LASALOCID A SODIUM	chembl:CHEMBL1489769	FALSE	FALSE	FALSE
SMAD3	DTC	NULL	0.0254768	DNDI1417181	CHEMBL:CHEMBL1537417	chembl:CHEMBL1537417	FALSE	FALSE	FALSE
SMAD3	DTC	NULL	0.0254768	OUABAIN	OUABAIN	rxcui:7762	FALSE	FALSE	FALSE
SMAD3	DTC	NULL	0.0254768	SJ000294102	CHEMBL:CHEMBL607309	chembl:CHEMBL607309	FALSE	FALSE	FALSE
SMAD3	DTC	NULL	0.0254768	DNDI1417601	CHEMBL:CHEMBL1503729	chembl:CHEMBL1503729	FALSE	FALSE	FALSE
SMAD3	DTC	NULL	0.0254768	POMIFERIN	POMIFERIN	rxcui:2593691	FALSE	FALSE	FALSE
SMAD3	DTC	NULL	0.0254768	GUANIDINYL-NALTRINDOLE DI-TRIFLUOROACETATE	CHEMBL:CHEMBL1255944	chembl:CHEMBL1255944	FALSE	FALSE	FALSE
SMAD3	DTC	NULL	0.0254768	TCMDC-123713	CHEMBL:CHEMBL586135	chembl:CHEMBL586135	FALSE	FALSE	FALSE
SMAD3	DTC	NULL	0.0254768	SJ000154295	CHEMBL:CHEMBL578502	chembl:CHEMBL578502	FALSE	FALSE	FALSE
CSNK1D	DTC	NULL	0.0246053	CYC-116	CYC-116	chembl:CHEMBL482967	FALSE	FALSE	FALSE
CCND1	TdgClinicalTrial	NULL	0.024042	ARSENIC TRIOXIDE	ARSENIC TRIOXIDE	rxcui:18330	TRUE	FALSE	TRUE
CCND1	NCI	NULL	0.024042	ACETAMINOPHEN	ACETAMINOPHEN	rxcui:161	TRUE	FALSE	FALSE
GSK3B	DTC	NULL	0.0237806	KENPAULLONE	KENPAULLONE	iuphar.ligand:6000	FALSE	FALSE	FALSE
CTNNB1	PharmGKB	NULL	0.0237484	celecoxib	CELECOXIB	rxcui:140587	TRUE	FALSE	TRUE
CSNK1D	DTC	NULL	0.0236308	DOVITINIB	DOVITINIB	ncit:C76199	FALSE	FALSE	TRUE
SMAD3	DTC	NULL	0.0229291	TCMDC-124176	CHEMBL:CHEMBL588038	chembl:CHEMBL588038	FALSE	FALSE	FALSE
SMAD3	DTC	NULL	0.0229291	ZM-39923 HCL	CHEMBL:CHEMBL538798	chembl:CHEMBL538798	FALSE	FALSE	FALSE
SMAD3	DTC	NULL	0.0229291	DNDI1318477	CHEMBL:CHEMBL428064	chembl:CHEMBL428064	FALSE	FALSE	FALSE
SMAD3	DTC	NULL	0.0229291	GARCINONE E	GARCINONE E	chembl:CHEMBL454580	FALSE	FALSE	FALSE
SMAD3	DTC	NULL	0.0229291	CP-55940	CP55940	iuphar.ligand:730	FALSE	FALSE	FALSE
SMAD3	DTC	NULL	0.0229291	NSC-130813	CHEMBL:CHEMBL463783	chembl:CHEMBL463783	FALSE	FALSE	FALSE
SMAD3	DTC	NULL	0.0229291	CLOXYQUIN	CLOXYQUIN	ncit:C61689	FALSE	FALSE	FALSE
SMAD3	DTC	NULL	0.0229291	NSC-105827	CHEMBL:CHEMBL171699	chembl:CHEMBL171699	FALSE	FALSE	FALSE
SMAD3	DTC	NULL	0.0229291	TCMDC-123951	CHEMBL:CHEMBL587849	chembl:CHEMBL587849	FALSE	FALSE	FALSE
SMAD3	DTC	NULL	0.0229291	GNF-PF-78	CHEMBL:CHEMBL579318	chembl:CHEMBL579318	FALSE	FALSE	FALSE
MYC	CIViC	NULL	0.0227306	IBRUTINIB	IBRUTINIB	rxcui:1442981	TRUE	FALSE	TRUE
STK3	DTC	NULL	0.0223437	RG-1530	RG-1530	iuphar.ligand:10361	FALSE	FALSE	FALSE
CCND1	NCI	NULL	0.0223247	NIFEDIPINE	NIFEDIPINE	rxcui:7417	TRUE	FALSE	FALSE
CCND1	ClearityFoundationBiomarkers	NULL	0.0223247	BAY1000394	RONICICLIB	ncit:C92579	FALSE	FALSE	TRUE
BIRC5	ClearityFoundationBiomarkers	NULL	0.0220992	PACLITAXEL	PACLITAXEL	rxcui:56946	TRUE	FALSE	TRUE
BIRC5	NCI	NULL	0.0220992	PACLITAXEL	PACLITAXEL	rxcui:56946	TRUE	FALSE	TRUE
CTNNB1	GuideToPharmacology	inhibitor	0.0220992	IUPHAR.LIGAND:4307	SB202190	iuphar.ligand:4307	FALSE	FALSE	FALSE
GSK3B	DTC	NULL	0.0219514	ALSTERPAULLONE	ALSTERPAULLONE	drugbank:DB04014	FALSE	FALSE	FALSE
BIRC5	NCI	NULL	0.0216974	SAHA	VORINOSTAT	rxcui:194337	TRUE	FALSE	TRUE
STK3	DTC	NULL	0.0216526	CYC-116	CYC-116	chembl:CHEMBL482967	FALSE	FALSE	FALSE
BIRC5	PharmGKB	NULL	0.0213099	methotrexate	METHOTREXATE	rxcui:6851	TRUE	FALSE	TRUE
BIRC5	NCI	NULL	0.0213099	MTX	METHOTREXATE	rxcui:6851	TRUE	FALSE	TRUE
CTNNB1	JAX-CKB	NULL	0.0212152	Imatinib	IMATINIB	rxcui:282388	TRUE	FALSE	TRUE
SMAD3	DTC	NULL	0.0208446	PYRITHIONE	PYRITHIONE	rxcui:35100	TRUE	FALSE	FALSE
SMAD3	DTC	NULL	0.0208446	ANGUSTIBALIN	ANGUSTIBALIN	chembl:CHEMBL486196	FALSE	FALSE	FALSE
SMAD3	DTC	NULL	0.0208446	SJ000029642	CHEMBL:CHEMBL591126	chembl:CHEMBL591126	FALSE	FALSE	FALSE
SMAD3	DTC	NULL	0.0208446	9-AMINOCAMPTOTHECIN	9-AMINOCAMPTOTHECIN	drugbank:DB12515	FALSE	FALSE	FALSE
SMAD3	DTC	NULL	0.0208446	GNF-PF-1644	CHEMBL:CHEMBL600734	chembl:CHEMBL600734	FALSE	FALSE	FALSE
SMAD3	DTC	NULL	0.0208446	GNF-PF-4459	CHEMBL:CHEMBL585502	chembl:CHEMBL585502	FALSE	FALSE	FALSE
SMAD3	DTC	NULL	0.0208446	GNF-PF-5151	CHEMBL:CHEMBL576208	chembl:CHEMBL576208	FALSE	FALSE	FALSE
SMAD3	DTC	NULL	0.0208446	GNF-PF-254	AKT INHIBITOR IV	iuphar.ligand:5919	FALSE	FALSE	FALSE
SMAD3	DTC	NULL	0.0208446	DNDI1417400	CHEMBL:CHEMBL1362503	chembl:CHEMBL1362503	FALSE	FALSE	FALSE
SMAD3	DTC	NULL	0.0208446	GNF-PF-2657	CHEMBL:CHEMBL578944	chembl:CHEMBL578944	FALSE	FALSE	FALSE
SMAD3	DTC	NULL	0.0208446	DNDI1417086	CHEMBL:CHEMBL1224755	chembl:CHEMBL1224755	FALSE	FALSE	FALSE
SMAD3	DTC	NULL	0.0208446	SJ000128325	CHEMBL:CHEMBL602718	chembl:CHEMBL602718	FALSE	FALSE	FALSE
STK3	DTC	NULL	0.0207951	DOVITINIB	DOVITINIB	ncit:C76199	FALSE	FALSE	TRUE
GSK3B	DTC	NULL	0.020754	JNJ-7706621	JNJ-7706621	iuphar.ligand:5932	FALSE	FALSE	FALSE
CSNK1D	DTC	NULL	0.0205751	ILORASERTIB	ILORASERTIB	ncit:C116729	FALSE	FALSE	TRUE
BIRC5	NCI	NULL	0.0205751	GENISTEIN	GENISTEIN	rxcui:25696	TRUE	FALSE	FALSE
STK3	DTC	NULL	0.0203913	TAE-684	NVP-TAE684	iuphar.ligand:5714	FALSE	FALSE	FALSE
GSK3B	PharmGKB	NULL	0.0203834	methotrexate	METHOTREXATE	rxcui:6851	TRUE	FALSE	TRUE
CSNK1D	DTC	NULL	0.0202264	CENISERTIB	CENISERTIB	ncit:C64540	FALSE	FALSE	TRUE
BIRC5	NCI	NULL	0.0202264	ERLOTINIB	ERLOTINIB	rxcui:337525	TRUE	FALSE	TRUE
MYC	NCI	NULL	0.0200029	IMATINIB	IMATINIB	rxcui:282388	TRUE	FALSE	TRUE
TGFB1	NCI	NULL	0.0197769	VERAPAMIL	VERAPAMIL	rxcui:11170	TRUE	FALSE	TRUE
TGFB1	NCI	NULL	0.0195596	RETINOIC ACID	TRETINOIN	rxcui:10753	TRUE	FALSE	TRUE
STK3	DTC	NULL	0.0194473	PF-562271	PF-562271	iuphar.ligand:9381	FALSE	FALSE	TRUE
CTNNB1	PharmGKB	NULL	0.0194042	cyclophosphamide	CYCLOPHOSPHAMIDE ANHYDROUS	rxcui:1545988	TRUE	FALSE	FALSE
SMAD3	DTC	NULL	0.0191076	TCMDC-139459	CHEMBL:CHEMBL86464	chembl:CHEMBL86464	FALSE	FALSE	FALSE
SMAD3	DTC	NULL	0.0191076	CHLOROTHALONIL	CHLOROTHALONIL	chembl:CHEMBL468167	FALSE	FALSE	FALSE
SMAD3	DTC	NULL	0.0191076	TCMDC-125544	CHEMBL:CHEMBL533602	chembl:CHEMBL533602	FALSE	FALSE	FALSE
SMAD3	DTC	NULL	0.0191076	ALPHA,BETA-DEHYDROCURVULARIN	CHEMBL:CHEMBL482050	chembl:CHEMBL482050	FALSE	FALSE	FALSE
SMAD3	DTC	NULL	0.0191076	GNF-PF-5134	CHEMBL:CHEMBL602969	chembl:CHEMBL602969	FALSE	FALSE	FALSE
SMAD3	DTC	NULL	0.0191076	PINAFIDE	PINAFIDE	ncit:C76757	FALSE	FALSE	FALSE
BIRC5	NCI	NULL	0.0189422	CPT-11	IRINOTECAN HYDROCHLORIDE	rxcui:153329	TRUE	FALSE	TRUE
GSK3B	DTC	NULL	0.0187126	SOTRASTAURIN	SOTRASTAURIN	ncit:C80630	FALSE	FALSE	FALSE
CTNNB1	PharmGKB	NULL	0.0185016	dexamethasone	DEXAMETHASONE	rxcui:3264	TRUE	FALSE	TRUE
CCND1	GuideToPharmacology	inhibitor	0.018385	IUPHAR.LIGAND:2714	DICLOFENAC SODIUM	rxcui:203214	TRUE	FALSE	FALSE
STK3	DTC	NULL	0.0181061	ILORASERTIB	ILORASERTIB	ncit:C116729	FALSE	FALSE	TRUE
STK3	DTC	NULL	0.0177992	CENISERTIB	CENISERTIB	ncit:C64540	FALSE	FALSE	TRUE
SMAD3	DTC	NULL	0.0176378	OXYPHENBUTAZONE	OXYPHENBUTAZONE	rxcui:7816	TRUE	FALSE	FALSE
SMAD3	DTC	NULL	0.0176378	NITROXOLINE	NITROXOLINE	rxcui:31901	FALSE	FALSE	FALSE
SMAD3	DTC	NULL	0.0176378	SANGUINARINE SULFATE	SANGUINARINE SULFATE	chembl:CHEMBL1565133	FALSE	FALSE	FALSE
SMAD3	DTC	NULL	0.0176378	A-443654	(2S)-1-(1H-INDOL-3-YL)-3-{[5-(3-METHYL-1H-INDAZOL-5-YL)PYRIDIN-3-YL]OXY}PROPAN-2-AMINE	drugbank:DB08073	FALSE	FALSE	FALSE
GSK3B	DTC	NULL	0.0175611	GW441756X	GW441756X	chembl:CHEMBL1516890	FALSE	FALSE	FALSE
GSK3B	DTC	NULL	0.017295	PHA-767491	PHA-767491	drugbank:DB17043	FALSE	FALSE	FALSE
MYC	CIViC	NULL	0.0170479	OLAPARIB	OLAPARIB	rxcui:1597582	TRUE	FALSE	TRUE
MYC	ClearityFoundationBiomarkers	NULL	0.0166691	ALISERTIB	ALISERTIB	ncit:C71717	FALSE	FALSE	TRUE
SMAD3	DTC	NULL	0.0163779	PROTOAPIGENONE	PROTOAPIGENONE	chembl:CHEMBL414890	FALSE	FALSE	FALSE
SMAD3	DTC	NULL	0.0163779	CRYPTOTANSHINONE	CRYPTOTANSHINONE	drugbank:DB15579	FALSE	FALSE	FALSE
SMAD3	DTC	NULL	0.0163779	4-({[2-(BENZYLOXY)PHENYL]METHYL}AMINO)PHENOL	CHEMBL:CHEMBL1465049	chembl:CHEMBL1465049	FALSE	FALSE	FALSE
BIRC5	NCI	NULL	0.0159114	IMATINIB	IMATINIB	rxcui:282388	TRUE	FALSE	TRUE
CCND1	GuideToPharmacology	agonist	0.0156273	IUPHAR.LIGAND:1909	INDOMETHACIN	rxcui:5781	TRUE	FALSE	FALSE
CCND1	NCI	NULL	0.0154344	ARA-C	CYTARABINE	rxcui:3041	TRUE	FALSE	TRUE
SMAD3	DTC	NULL	0.0152861	LANATOSIDE C	LANATOSIDE C	rxcui:27929	TRUE	FALSE	FALSE
SMAD3	DTC	NULL	0.0152861	2-PHENYLAMINO-[1,4]NAPHTHOQUINONE	CHEMBL:CHEMBL84010	chembl:CHEMBL84010	FALSE	FALSE	FALSE
SMAD3	DTC	NULL	0.0152861	ACACETIN	ACACETIN	chembl:CHEMBL243664	FALSE	FALSE	FALSE
SMAD3	DTC	NULL	0.0152861	LOBARIC ACID	LOBARIC ACID	chembl:CHEMBL551842	FALSE	FALSE	FALSE
BIRC5	NCI	NULL	0.0147328	ARA-C	CYTARABINE	rxcui:3041	TRUE	FALSE	TRUE
SMAD3	DTC	NULL	0.0143307	GNF-PF-159	CHEMBL:CHEMBL599924	chembl:CHEMBL599924	FALSE	FALSE	FALSE
SMAD3	DTC	NULL	0.0143307	NSC-102742	CHEMBL:CHEMBL1519374	chembl:CHEMBL1519374	FALSE	FALSE	FALSE
SMAD3	DTC	NULL	0.0143307	HELENALIN	HELENALIN	chembl:CHEMBL338474	FALSE	FALSE	FALSE
SMAD3	DTC	NULL	0.0143307	SENNOSIDE B	SENNOSIDE B	rxcui:56161	FALSE	FALSE	FALSE
CTNNB1	JAX-CKB	NULL	0.0139574	Sorafenib	SORAFENIB	rxcui:495881	TRUE	FALSE	TRUE
BIRC5	NCI	NULL	0.0138762	DEXAMETHASONE	DEXAMETHASONE	rxcui:3264	TRUE	FALSE	TRUE
BIRC5	NCI	NULL	0.0135609	CARBOPLATIN	CARBOPLATIN	rxcui:40048	TRUE	FALSE	TRUE
GSK3B	DTC	NULL	0.0128255	SP-600125	SP-600125	chembl:CHEMBL1725279	FALSE	FALSE	FALSE
CCND1	GuideToPharmacology	inhibitor	0.012757	IUPHAR.LIGAND:8741	RESVERATROL	rxcui:1000492	TRUE	FALSE	FALSE
SMAD3	DTC	NULL	0.0127384	DNDI1417941	CHEMBL:CHEMBL2095095	chembl:CHEMBL2095095	FALSE	FALSE	FALSE
SMAD3	DTC	NULL	0.0127384	4-PHENYLAMINO-[1,2]NAPHTHOQUINONE	CHEMBL:CHEMBL299853	chembl:CHEMBL299853	FALSE	FALSE	FALSE
SMAD3	DTC	NULL	0.0127384	CLIOQUINOL	CLIOQUINOL	rxcui:5942	TRUE	FALSE	FALSE
SMAD3	DTC	NULL	0.0127384	NSC-69187	CHEMBL:CHEMBL19954	chembl:CHEMBL19954	FALSE	FALSE	FALSE
TGFB1	PharmGKB	NULL	0.0126236	aspirin	ASPIRIN	rxcui:1191	TRUE	FALSE	TRUE
GSK3B	DTC	NULL	0.0121433	RG-1530	RG-1530	iuphar.ligand:10361	FALSE	FALSE	FALSE
SMAD3	DTC	NULL	0.012068	DIGITOXIN	DIGITOXIN	rxcui:3403	TRUE	FALSE	FALSE
SMAD3	DTC	NULL	0.012068	CALCIMYCIN	CALCIMYCIN	ncit:C83573	FALSE	FALSE	FALSE
SMAD3	DTC	NULL	0.012068	FENTICLOR	FENTICLOR	ncit:C65671	FALSE	FALSE	FALSE
TGFB1	NCI	NULL	0.0118661	DOXORUBICIN	DOXORUBICIN HYDROCHLORIDE	rxcui:142433	TRUE	FALSE	TRUE
GSK3B	DTC	NULL	0.0117677	CYC-116	CYC-116	chembl:CHEMBL482967	FALSE	FALSE	FALSE
SMAD3	DTC	NULL	0.0114646	CALMIDAZOLIUM CHLORIDE	CALMIDAZOLIUM CHLORIDE	chembl:CHEMBL1208858	FALSE	FALSE	FALSE
SMAD3	DTC	NULL	0.0114646	STREPTONIGRIN	STREPTONIGRIN	ncit:C844	FALSE	FALSE	FALSE
CCND1	NCI	NULL	0.0111623	METHOTREXATE	METHOTREXATE	rxcui:6851	TRUE	FALSE	TRUE
CCND1	NCI	NULL	0.0111623	MTX	METHOTREXATE	rxcui:6851	TRUE	FALSE	TRUE
GSK3B	DTC	NULL	0.0105692	PF-562271	PF-562271	iuphar.ligand:9381	FALSE	FALSE	TRUE
CCND1	PharmGKB	NULL	0.0105057	fluorouracil	FLUOROURACIL	rxcui:4492	TRUE	FALSE	TRUE
SMAD3	DTC	NULL	0.0104223	FLUSPIRILENE	FLUSPIRILENE	rxcui:4507	TRUE	FALSE	FALSE
BIRC5	NCI	NULL	0.0100282	5-FU	FLUOROURACIL	rxcui:4492	TRUE	FALSE	TRUE
SMAD3	DTC	NULL	0.00996918	THIOMERSAL	THIMEROSAL	rxcui:10472	TRUE	FALSE	FALSE
SMAD3	DTC	NULL	0.00996918	GNF-PF-1919	DECYNIUM 22	iuphar.ligand:8482	FALSE	FALSE	FALSE
SMAD3	DTC	NULL	0.0095538	METHYLTHIONINIUM CHLORIDE	METHYLTHIONINIUM CHLORIDE	chembl:CHEMBL405110	FALSE	FALSE	FALSE
SMAD3	DTC	NULL	0.0095538	GNF-PF-2272	CHEMBL:CHEMBL601757	chembl:CHEMBL601757	FALSE	FALSE	FALSE
SMAD3	DTC	NULL	0.00917165	SANGUINARIUM	SANGUINARIUM	ncit:C81358	FALSE	FALSE	FALSE
SMAD3	DTC	NULL	0.00881889	9,10-PHENANTHRENEQUINONE	9,10-PHENANTHRENEQUINONE	chembl:CHEMBL51931	FALSE	FALSE	FALSE
SMAD3	DTC	NULL	0.00881889	BETA-LAPACHONE	LAPACHONE	ncit:C28694	FALSE	FALSE	FALSE
CCND1	PharmGKB	NULL	0.00862195	cisplatin	CISPLATIN	rxcui:2555	TRUE	FALSE	TRUE
CCND1	PharmGKB	NULL	0.00833455	doxorubicin	DOXORUBICIN HYDROCHLORIDE	rxcui:142433	TRUE	FALSE	TRUE
BIRC5	NCI	NULL	0.00823004	DDP	CISPLATIN	rxcui:2555	TRUE	FALSE	TRUE
SMAD3	DTC	NULL	0.00818897	ELLAGIC ACID	ELLAGIC ACID	rxcui:1043181	FALSE	FALSE	FALSE
BIRC5	NCI	NULL	0.00795571	DOXORUBICIN	DOXORUBICIN HYDROCHLORIDE	rxcui:142433	TRUE	FALSE	TRUE
SMAD3	DTC	NULL	0.00790659	GR-127935	GR 127935	iuphar.ligand:14	FALSE	FALSE	FALSE
SMAD3	DTC	NULL	0.00790659	GNF-PF-67	CHEMBL:CHEMBL578512	chembl:CHEMBL578512	FALSE	FALSE	FALSE
SMAD3	NCI	NULL	0.00790659	GENISTEIN	GENISTEIN	rxcui:25696	TRUE	FALSE	FALSE
SMAD3	DTC	NULL	0.00739649	SJ000044511	CHEMBL:CHEMBL592124	chembl:CHEMBL592124	FALSE	FALSE	FALSE
CCND1	CIViC	NULL	0.0072685	BORTEZOMIB	BORTEZOMIB	rxcui:358258	TRUE	FALSE	TRUE
BIRC5	ClearityFoundationBiomarkers	NULL	0.00718889	DOCETAXEL	DOCETAXEL ANHYDROUS	rxcui:1299922	TRUE	FALSE	TRUE
SMAD3	DTC	NULL	0.00694822	IBRUTINIB	IBRUTINIB	rxcui:1442981	TRUE	FALSE	TRUE
SMAD3	DTC	NULL	0.00694822	CURCUMIN	CURCUMIN	rxcui:2955	TRUE	FALSE	FALSE
SMAD3	DTC	NULL	0.00674386	FLUDARABINE	FLUDARABINE	rxcui:24698	TRUE	FALSE	TRUE
SMAD3	DTC	NULL	0.00655118	NSC-228155	CHEMBL:CHEMBL505670	chembl:CHEMBL505670	FALSE	FALSE	FALSE
SMAD3	DTC	NULL	0.00573228	AZACITIDINE	AZACITIDINE	rxcui:1251	TRUE	FALSE	TRUE
SMAD3	DTC	NULL	0.00559247	HEXACHLOROPHENE	HEXACHLOROPHENE	rxcui:5293	TRUE	FALSE	FALSE
SMAD3	NCI	NULL	0.00533235	DEXAMETHASONE	DEXAMETHASONE	rxcui:3264	TRUE	FALSE	TRUE
SMAD3	DTC	NULL	0.00521116	MITOXANTRONE	MITOXANTRONE	rxcui:7005	TRUE	FALSE	TRUE
MYC	CIViC	NULL	0.00517317	CISPLATIN	CISPLATIN	rxcui:2555	TRUE	FALSE	TRUE
SMAD3	DTC	NULL	0.0047769	GOSSYPOL	GOSSYPOL	ncit:C529	FALSE	FALSE	FALSE
SMAD3	DTC	NULL	0.0047769	KENPAULLONE	KENPAULLONE	iuphar.ligand:6000	FALSE	FALSE	FALSE
SMAD3	DTC	NULL	0.00458582	NSC-95397	CHEMBL:CHEMBL429095	chembl:CHEMBL429095	FALSE	FALSE	FALSE
SMAD3	DTC	NULL	0.00440944	ALSTERPAULLONE	ALSTERPAULLONE	drugbank:DB04014	FALSE	FALSE	FALSE
SMAD3	DTC	NULL	0.00305721	IMATINIB	IMATINIB	rxcui:282388	TRUE	FALSE	TRUE
SMAD3	DTC	NULL	0.00297781	DASATINIB	DASATINIB ANHYDROUS	rxcui:1546019	TRUE	FALSE	TRUE
SMAD3	DTC	NULL	0.00283075	VINCRISTINE	VINCRISTINE	rxcui:11202	TRUE	FALSE	TRUE
SMAD3	DTC	NULL	0.00241359	CYCLOHEXIMIDE	CYCLOHEXIMIDE	ncit:C171712	FALSE	FALSE	FALSE
SMAD3	DTC	NULL	0.00152861	DOXORUBICIN HYDROCHLORIDE	DOXORUBICIN HYDROCHLORIDE	rxcui:142433	TRUE	FALSE	TRUE
YAP1	PharmGKB	NULL	NULL	Platinum compounds	NULL	NULL	NULL	NULL	NULL
NF2	CGI	NULL	NULL	Tensirolimus	NULL	NULL	NULL	NULL	NULL
NF2	CGI	NULL	NULL	Chemotherapy	NULL	NULL	NULL	NULL	NULL
DLG4	NCI	NULL	NULL	OPIOID	NULL	NULL	NULL	NULL	NULL
TP73	NCI	NULL	NULL	UVB	NULL	NULL	NULL	NULL	NULL
CCN2	NCI	NULL	NULL	UVB	NULL	NULL	NULL	NULL	NULL
AREG	PharmGKB	NULL	NULL	radiotherapy	NULL	NULL	NULL	NULL	NULL
BIRC5	NCI	NULL	NULL	TAXANES	NULL	NULL	NULL	NULL	NULL
BIRC5	CIViC	NULL	NULL	TAXANE COMPOUND	NULL	NULL	NULL	NULL	NULL
BIRC5	TdgClinicalTrial	NULL	NULL	SPC-3042	NULL	NULL	NULL	NULL	NULL
AFP	NCI	NULL	NULL	LIGNANS	NULL	NULL	NULL	NULL	NULL
ITGB2	NCI	NULL	NULL	OPIOIDS	NULL	NULL	NULL	NULL	NULL
ITGB2	NCI	NULL	NULL	OPIOID	NULL	NULL	NULL	NULL	NULL
TGFB1	PharmGKB	NULL	NULL	Iodine (131I) compounds	NULL	NULL	NULL	NULL	NULL
TGFB1	NCI	NULL	NULL	ISOFLAVONES	NULL	NULL	NULL	NULL	NULL
TGFB1	PharmGKB	NULL	NULL	radiotherapy	NULL	NULL	NULL	NULL	NULL
TGFBR1	TdgClinicalTrial	NULL	NULL	TG-C	NULL	NULL	NULL	NULL	NULL
TGFBR2	TdgClinicalTrial	NULL	NULL	TG-C	NULL	NULL	NULL	NULL	NULL
SMAD7	PharmGKB	NULL	NULL	FOLFOX	NULL	NULL	NULL	NULL	NULL
WNT5B	PharmGKB	NULL	NULL	Platinum compounds	NULL	NULL	NULL	NULL	NULL
CTNNB1	TTD	NULL	NULL	C 82	NULL	NULL	NULL	NULL	NULL
CTNNB1	JAX-CKB	NULL	NULL	WNTinib	NULL	NULL	NULL	NULL	NULL
CTNNB1	JAX-CKB	NULL	NULL	CC-91516	NULL	NULL	NULL	NULL	NULL
CTNNB1	JAX-CKB	NULL	NULL	BC21	NULL	NULL	NULL	NULL	NULL
CTNNB1	JAX-CKB	NULL	NULL	PMED-1	NULL	NULL	NULL	NULL	NULL
CTNNB1	JAX-CKB	NULL	NULL	unspecified PD-1 antibody	NULL	NULL	NULL	NULL	NULL
CTNNB1	JAX-CKB	NULL	NULL	unspecified PD-L1 antibody	NULL	NULL	NULL	NULL	NULL
CTNNB1	JAX-CKB	NULL	NULL	unspecified CTLA4 antibody	NULL	NULL	NULL	NULL	NULL
CTNNB1	JAX-CKB	NULL	NULL	NVP-TNKS656	NULL	NULL	NULL	NULL	NULL
CTNNB1	JAX-CKB	NULL	NULL	Mps-BAY2b	NULL	NULL	NULL	NULL	NULL
CTNNB1	JAX-CKB	NULL	NULL	NTRC 0066-0	NULL	NULL	NULL	NULL	NULL
CTNNB1	JAX-CKB	NULL	NULL	G007-LK	NULL	NULL	NULL	NULL	NULL
APC	JAX-CKB	NULL	NULL	PKF115-584	NULL	NULL	NULL	NULL	NULL
APC	CIViC	NULL	NULL	G007-LK	NULL	NULL	NULL	NULL	NULL
APC	JAX-CKB	NULL	NULL	MF tricyclic	NULL	NULL	NULL	NULL	NULL
APC	JAX-CKB	NULL	NULL	CCT036477	NULL	NULL	NULL	NULL	NULL
APC	JAX-CKB	NULL	NULL	CCT031374	NULL	NULL	NULL	NULL	NULL
APC	JAX-CKB	NULL	NULL	iCRT-3	NULL	NULL	NULL	NULL	NULL
APC	JAX-CKB	NULL	NULL	NC043	NULL	NULL	NULL	NULL	NULL
APC	JAX-CKB	NULL	NULL	JW55	NULL	NULL	NULL	NULL	NULL
APC	JAX-CKB	NULL	NULL	iCRT-14	NULL	NULL	NULL	NULL	NULL
APC	JAX-CKB	NULL	NULL	G-631	NULL	NULL	NULL	NULL	NULL
APC	JAX-CKB	NULL	NULL	TASIN-1	NULL	NULL	NULL	NULL	NULL
APC	JAX-CKB	NULL	NULL	XAV939	NULL	NULL	NULL	NULL	NULL
APC	JAX-CKB	NULL	NULL	FH535	NULL	NULL	NULL	NULL	NULL
APC	JAX-CKB	NULL	NULL	StAx-35	NULL	NULL	NULL	NULL	NULL
APC	JAX-CKB	NULL	NULL	PKF118-310	NULL	NULL	NULL	NULL	NULL
APC	JAX-CKB	NULL	NULL	JW74	NULL	NULL	NULL	NULL	NULL
APC	JAX-CKB	NULL	NULL	G007-LK	NULL	NULL	NULL	NULL	NULL
APC	JAX-CKB	NULL	NULL	CGP049090	NULL	NULL	NULL	NULL	NULL
APC	CIViC	NULL	NULL	JW55	NULL	NULL	NULL	NULL	NULL
APC	JAX-CKB	NULL	NULL	NVP-TNKS656	NULL	NULL	NULL	NULL	NULL
APC	JAX-CKB	NULL	NULL	CCT070535	NULL	NULL	NULL	NULL	NULL
APC	JAX-CKB	NULL	NULL	iCRT-5	NULL	NULL	NULL	NULL	NULL
APC	JAX-CKB	NULL	NULL	IWR-1	NULL	NULL	NULL	NULL	NULL
APC	JAX-CKB	NULL	NULL	JW67	NULL	NULL	NULL	NULL	NULL
APC	JAX-CKB	NULL	NULL	K-756	NULL	NULL	NULL	NULL	NULL
AXIN2	PharmGKB	NULL	NULL	Platinum compounds	NULL	NULL	NULL	NULL	NULL
TCF7L2	PharmGKB	NULL	NULL	Dipeptidyl peptidase 4 (DPP-4) inhibitors	NULL	NULL	NULL	NULL	NULL
TCF7L2	PharmGKB	NULL	NULL	sulfonamides, urea derivatives	NULL	NULL	NULL	NULL	NULL
MYC	CIViC	NULL	NULL	JQ-1	NULL	NULL	NULL	NULL	NULL
MYC	NCI	NULL	NULL	DAB	NULL	NULL	NULL	NULL	NULL
MYC	TdgClinicalTrial	NULL	NULL	AVI-5126	NULL	NULL	NULL	NULL	NULL
MYC	NCI	NULL	NULL	LIGNAN	NULL	NULL	NULL	NULL	NULL
BIRC2	TALC	inhibitor	NULL	GDC0917	NULL	NULL	NULL	NULL	NULL
BIRC2	TALC	inhibitor	NULL	AEG40826	NULL	NULL	NULL	NULL	NULL
BIRC3	TALC	inhibitor	NULL	GDC0917	NULL	NULL	NULL	NULL	NULL
BIRC3	TALC	inhibitor	NULL	AEG40826	NULL	NULL	NULL	NULL	NULL
CTNNA2	PharmGKB	NULL	NULL	Tumor necrosis factor alpha (TNF-alpha) inhibitors	NULL	NULL	NULL	NULL	NULL
