# Supplementary material for: Identification and validation of the important role of YAP in the development and progression of Osteosarcoma
Source: Research Square preprint supplement (doi:10.21203/rs.3.rs-6614090/v1), 2025-07-08
Supplement: Supplementary file 3 [file 84aff2a0b7fcd9e06d9ecf30.xlsx]

## Sheet: Table 3
Table 3. KEGG enrichment list of CNV genes
ID	Description	P-value	q-value	Gene Symbols	Enrichment Ratio
hsa01100	Metabolic pathways	1.13923e-13	2.45708e-11	DOLK|GSR|NDUFB9|GSTA5|IDI2|MAT1A|GSTA2|AGXT2|DHTKD1|MOCS2|URAD|OAT|DCTPP1|PI4K2A|HIBADH|UQCRB|SQLE|AHCYL1|SELENBP1|DHRS4|INPP4A|PDE7A|PLA2G7|PLA2G5|SPTLC1|GOT2|GLO1|NNT|PYGL|PIP4K2C|B3GALT5|EXT1|EXTL2|EXTL3|BCAT2|GSTA1|IMPA1|GMPR2|NADK2|SHMT2|MAN1A2|ADCY4|HOGA1|NME7|INPP5D|PLD1|PLD2|FDFT1|HYAL1|ADCY8|MOCS1|ACSL5|ECHS1|CYP26A1|SMPD1|UQCRFS1|HSD17B7|DHODH|ALPG|ALDH3A2|ALG6|ATP6V1H|IMPAD1|ALDH2|ADCY…	176/1433
hsa05200	Pathways in cancer	3.54142e-12	6.29018e-10	IL7R|CAMK2G|PDGFRA|HLF|PLD1|HRAS|VEGFA|GSTA1|GSTA2|FRAT1|PLCG1|PTK2|RUNX1T1|ELOC|LAMB1|FZD10|FLT3|GNAI1|FZD1|BCL2L11|FZD5|FZD6|IL7|CCNE2|FZD9|CCNE1|JUN|CKS1B|GNG12|PTGER3|HSP90AB1|IFNG|WNT8B|PRKACB|GSTA5|GNG2|NFKB2|FGF10|NCOA3|ARHGEF11|GNAQ|CDK6|TPM3|PRKCA|NKX3-1|WNT16|RXRG|JAK1|IL6R|FASLG|FZD7|STK4|FZD8|SUFU|HGF|SKP2|MDM2|MYC|HEY1|ADCY4|GLI1|BMP4|TP53|BMP2|ADCY2|ARNT|CCNA1|ADCY8|NOTCH2|KIT|IL6|M…	85/530
hsa05205	Proteoglycans in cancer	4.05442e-08	4.45175e-06	PTK2|TIMP3|HRAS|FRS2|MAPK14|HGF|PLCG1|FZD10|CAV1|FZD1|DROSHA|FZD5|FZD6|MET|TWIST1|FZD9|VEGFA|WNT8B|DDX5|SCT|MYC|KDR|CTSL|PRKCA|CAMK2G|PLAU|FASLG|ITPR2|MDM2|TP53|VAV3|FZD7|SDC4|FZD8|PRKACB|COL21A1|WNT16|SDC2|CDC42	39/203
hsa04151	PI3K-Akt signaling pathway	5.57927e-08	5.80917e-06	IL7R|PDGFRA|PTK2|GHR|HRAS|PRKAA1|ITGA10|CRTC2|NTRK2|LAMB1|CREB3L4|FLT3|YWHAZ|THEM4|BCL2L11|MET|CCNE2|CCNE1|THBS3|GNG12|CD19|HSP90AB1|VEGFA|OSMR|MAGI2|JAK1|YWHAB|COL1A2|MYC|FGF10|ANGPT1|KDR|CDK6|TNR|PRKCA|CREB5|EFNA4|IL6R|FASLG|HGF|MDM2|PRLR|GNG2|EIF4E2|TP53|KIT|IL6|IL7|CDK4|GNGT1|COL1A1|LPAR3|MCL1|RHEB|FGF21	55/354
hsa04971	Gastric acid secretion	8.87915e-08	8.79036e-06	GNAI1|SLC9A4|KCNJ10|KCNJ16|KCNJ15|PRKCA|CAMK2G|ATP1B2|MYLK3|ATP1B1|SLC26A7|ITPR2|ADCY4|KCNJ2|GNAQ|ADCY2|CA2|ADCY8|ATP1A4|ATP1A2|ATP1A1|PRKACB	22/75
hsa04919	Thyroid hormone signaling pathway	9.2806e-08	9.0396e-06	RCAN1|HRAS|RCAN2|PLCG1|MED1|MDM2|NCOR1|NCOA2|NCOA3|MYH6|MYH7|DIO2|MYC|PRKCA|MED30|RXRG|ATP1B2|ATP1B1|PLCD4|GATA4|BMP4|TP53|NOTCH2|ATP1A4|ATP1A2|ATP1A1|PRKACB|RHEB	28/119
hsa04974	Protein digestion and absorption	1.06559e-07	1.00548e-05	SAT2|COL11A1|SLC7A8|PRSS1|COL3A1|KCNK5|SLC8A1|SLC8A3|DPP4|ATP1B2|ATP1B1|ACE2|COL24A1|COL15A1|COL22A1|COL14A1|ATP1A4|COL1A2|ATP1A2|ATP1A1|COL1A1|COL21A1|SLC1A5|MEP1A	24/90
hsa04390	Hippo signaling pathway	1.40091e-07	1.28183e-05	SAV1|LATS2|GDF5|FZD10|YWHAZ|FZD1|FZD5|FZD6|FZD7|FZD8|FZD9|GDF7|PARD6B|PARD6A|WNT8B|YWHAB|GDF6|MYC|BMP8A|BMP8B|CRB1|CRB2|PRKCZ|SNAI2|FRMD6|FRMD1|YAP1|BMP5|BMP4|BMP2|PARD6G|WNT16	32/154
hsa04934	Cushing syndrome	4.495e-07	3.71853e-05	AIPL1|RAP1B|CYP17A1|FZD10|GNAI1|FZD1|RASD1|FZD6|FZD7|CCNE2|FZD9|CCNE1|WNT8B|PBX1|CDKN2C|CREB3L4|CREB5|CAMK2G|ITPR2|FZD5|ADCY4|GNAQ|ADCY2|ARNT|ADCY8|AHR|FZD8|CDK4|CDK6|PRKACB|WNT16	31/155
hsa04060	Cytokine-cytokine receptor interaction	5.50943e-07	4.43619e-05	IL7R|IL1RL1|IL1RL2|NODAL|TNFSF18|SCYL3|TNFRSF10A|IL22|IL25|LIFR|IL26|INHBA|IL1R2|IL1R1|GHR|IL18RAP|XCL2|PRLR|GDF7|GDF6|GDF5|TNFRSF10D|CCL28|CXCR1|OSMR|INHBE|TNFSF4|BMP8A|BMP8B|IFNG|IL18R1|LEPR|IL37|TNFRSF21|XCL1|FASLG|CXCL13|IL6R|TNFRSF13B|CXCL16|BMP5|BMP4|BMP2|IL6|IL7|IL15RA	46/294
hsa05202	Transcriptional misregulation in cancer	7.90502e-07	5.9673e-05	PTK2|BCL11B|ERG|RUNX1T1|FCGR1A|SUPT3H|FLT3|NCOR1|RUNX2|CCNA1|HOXA11|IL1R2|HOXA10|DDX5|MYC|EYA1|CDKN2C|HHEX|TMPRSS2|RXRG|HMGA2|PLAU|PER2|TP53|MDM2|PBX1|ETV5|GZMB|IL6|MET|RUNX1|WNT16|BCL6|HOXA9	34/186
hsa04972	Pancreatic secretion	1.30856e-06	9.26833e-05	RAP1B|PRSS1|CLCA2|CLCA1|CLCA4|PNLIPRP1|PLA2G12B|PLA2G5|AMY2B|PRKCA|ATP1B2|ATP1B1|PLA2G2A|PLA2G2C|ITPR2|ADCY4|GNAQ|ADCY2|CA2|ADCY8|ATP1A4|ATP1A2|ATP1A1	23/98
hsa04928	Parathyroid hormone synthesis, secretion and action	1.34411e-06	9.32996e-05	MMP16|MEF2D|MAFB|ADCY2|GNAI1|PTHLH|CYP27B1|ARHGEF11|PRKCA|CREB5|RXRG|ITPR2|PLD1|ADCY4|CYP24A1|GNAQ|PLD2|ADCY8|RUNX2|MEF2A|GNA13|CREB3L4|PRKACB|PDE4B	24/106
hsa05165	Human papillomavirus infection	1.99288e-06	0.000134327	PTK2|CCN1|HRAS|ATP6V1H|PARD6B|ITGA10|PARD6G|LAMB1|FZD10|FZD1|FZD5|FZD6|CCNA1|CCNE2|FZD9|CCNE1|THBS3|PARD6A|VEGFA|WNT8B|JAK1|COL1A2|HEY1|CREB3L4|TNR|CREB5|COL1A1|PRKCZ|FASLG|ATP6V0D2|HGF|MDM2|UBR4|CSNK1A1L|JAG1|TP53|IRF9|FZD7|NOTCH2|FZD8|PTGER4|CDK4|CDK6|PRKACB|WNT16|ATP6V1C1|RHEB|CDC42	48/330
hsa04911	Insulin secretion	2.17737e-06	0.000142925	ADCY4|CAMK2G|GNAQ|ADCY2|PRKCA|ATP1B2|CREB5|CREB3L4|ADCY8|ATP1B1|KCNN3|ATP1A4|PCLO|ATP1A2|ATP1A1|PRKACB|PDX1|GLP1R|ADCYAP1R1|RIMS2|KCNMB4	21/86
hsa04015	Rap1 signaling pathway	3.48962e-06	0.000215039	PDGFRA|HRAS|RAP1B|MAPK14|RAPGEF5|PLCG1|MAP2K6|FYB1|GNAI1|ADORA2A|PARD6G|PARD6B|PARD6A|MAGI2|FGF10|KDR|FARP2|PRKCA|EFNA4|PRKCZ|VEGFA|KRIT1|ADCY4|ANGPT1|GNAQ|ADCY2|VAV3|ADCY8|KIT|MET|LPAR3|FGF21|PRKD1|PRKD2|CDC42	35/210
hsa05224	Breast cancer	3.60609e-06	0.000219971	HRAS|FZD10|FZD1|FZD5|FZD6|FZD7|FZD8|FZD9|JUN|WNT8B|MYC|FGF10|SHC1|NCOA3|HGF|NFKB2|HEY1|CSNK1A1L|JAG1|TP53|NOTCH2|KIT|FRAT1|FRAT2|CDK4|CDK6|WNT16|FGF21	28/147
hsa05163	Human cytomegalovirus infection	5.7528e-06	0.000321677	PDGFRA|PTK2|NFATC4|HRAS|MAPK14|HGF|MAP2K6|CREB3L4|IL1R1|GNAI1|PTGER4|GNG12|PTGER3|JAK1|GNG2|MYC|ARHGEF11|GNGT1|PRKCA|CREB5|IL6R|FASLG|ITPR2|MDM2|ADCY4|TP53|GNAQ|ADCY2|ADCY8|IL6|CDK4|GNA13|CDK6|PRKACB|VEGFA|RHEB	36/225
hsa04961	Endocrine and other factor-regulated calcium reabsorption	7.72564e-06	0.000410956	AP2S1|AP2A2|GNAQ|PRKCA|HK1|ATP1B2|DNM3|ATP1B1|ATP1A4|CALB1|ATP1A2|ATP1A1|PRKACB|SLC8A1|SLC8A3	15/50
hsa05418	Fluid shear stress and atherosclerosis	1.04597e-05	0.000531619	PTK2|GSTA5|GSTA1|PRKAA1|MAPK14|MAP2K6|MAP2K4|IL1R2|IL1R1|CAV1|JUN|HSP90AB1|NPPC|KDR|ARHGEF2|CTSL|IFNG|PRKCZ|VEGFA|GSTA2|BMP4|TP53|SELE|SDC2|SDC4|MEF2A	26/139
hsa04918	Thyroid hormone synthesis	1.18455e-05	0.000576896	ADCY4|GSR|GNAQ|ADCY2|PRKCA|ATP1B2|CREB5|CREB3L4|ADCY8|ATP1B1|ASGR2|ATP1A4|ATP1A2|ATP1A1|PRKACB|ITPR2|TG|TSHR	18/74
hsa04144	Endocytosis	1.25325e-05	0.000605472	SNX3|PDGFRA|EHD2|WWP1|HRAS|CHMP4C|WASL|DNM3|DAB2|CHMP7|CAV1|VPS45|AP2S1|PARD6G|GRK5|PARD6B|PARD6A|CXCR1|DNAJC6|WASHC5|SH3GLB1|AGAP1|AGAP2|PRKCZ|ARFGEF1|AP2A2|CYTH1|VPS26A|MDM2|ZFYVE27|PLD1|PLD2|KIF5A|PIP5K1A|GBF1|ASAP1|CDC42	37/244
hsa04310	Wnt signaling pathway	1.44947e-05	0.000683855	CCN4|NFATC4|CACYBP|VANGL2|FZD10|FZD1|PRICKLE4|FZD5|FZD6|FZD7|FZD8|FZD9|JUN|WNT8B|MYC|PRKCA|DAAM1|DAAM2|CAMK2G|RSPO2|CSNK1A1L|TP53|SFRP5|FRAT1|FRAT2|PRKACB|WNT16|CTBP2	28/160
hsa04530	Tight junction	1.57136e-05	0.000729957	CD1D|CD1E|CD1B|CD1C|CD1A|IGSF5|PRKAA1|WASL|MYH2|TUBA3C|MYH1|MYH4|CGN|PARD6G|JUN|PARD6B|PARD6A|RAB13|ARHGEF2|PRKAB2|CLDN23|PRKCZ|GATA4|TJAP1|RUNX1|CDK4|PRKACB|YBX3|CDC42	29/170
hsa04020	Calcium signaling pathway	2.31546e-05	0.000983283	NOP9|STIM1|PTGFR|CAMK1D|PDGFRA|TRHR|PLCG1|P2RX1|VDAC2|ADORA2A|CASQ1|CASQ2|PDE1C|ASPH|CACNA1E|PTGER3|SLC8A1|SLC8A3|PRKCA|CAMK2G|MYLK3|PLCD4|ITPR2|TACR2|ADCY4|GNAQ|ADCY2|ADCY8|GRIN2D|PRKACB|MCU	31/193
hsa05226	Gastric cancer	3.00691e-05	0.00119129	CDH17|HRAS|CDX2|FZD10|FZD1|FZD5|FZD6|FRAT1|CCNE2|FZD9|CCNE1|WNT8B|MYC|FGF10|SHC1|RXRG|HGF|CSNK1A1L|TP53|REG4|FZD7|FZD8|MET|FRAT2|WNT16|FGF21	26/149
hsa04621	NOD-like receptor signaling pathway	3.32432e-05	0.0012706	ANTXR1|NAMPT|MAPK14|RIPK3|RIPK2|NLRP12|TXNIP|VDAC2|DHX33|RNF31|NLRP7|NLRP1|JUN|HSP90AB1|IFI16|JAK1|GBP1|GBP3|GBP2|CTSB|GBP7|GBP5|AIM2|ITPR2|GBP4|IRF9|IL6|POP1|MCU	29/178
hsa04925	Aldosterone synthesis and secretion	3.63579e-05	0.00137228	ADCY4|CAMK2G|GNAQ|ADCY2|PRKCA|ATP1B2|CREB5|CREB3L4|ADCY8|ATP1B1|CAMK1D|ATP1A4|ATP1A2|ATP1A1|PRKACB|ITPR2|CYP11B2|PRKD1|PRKD2|KCNK9	20/98
hsa04714	Thermogenesis	4.70112e-05	0.00167	KDM1A|NDUFB9|HRAS|PRKAA1|FRS2|MAPK14|NDUFAF6|ADCY10|UQCRB|NDUFA4L2|COX6C|PRKAB2|BMP8A|BMP8B|COA5|NDUFS6|CREB5|COA1|NDUFA9|SLC25A20|HGF|ADCY4|KDM3A|ADCY2|ADCY8|ATP5PB|ACSL5|NDUFS2|CREB3L4|PRKACB|COX10|UQCRFS1|RHEB|FGF21	34/231
hsa04916	Melanogenesis	5.25987e-05	0.00182554	ADCY4|FZD1|GNAQ|FZD6|FZD7|FZD8|FZD9|HRAS|CAMK2G|ADCY8|KIT|PRKCA|WNT8B|FZD5|CREB3L4|PRKACB|WNT16|FZD10|ADCY2|GNAI1	20/101
hsa04260	Cardiac muscle contraction	6.59662e-05	0.00222553	ATP1B2|MYH6|MYH7|CASQ2|TPM3|ASPH|ATP1B1|ATP1A4|CACNA2D4|ATP1A1|CACNB2|SLC8A1|UQCRFS1|CACNA2D1|UQCRB|SLC8A3|COX6C|ATP1A2	18/86
hsa04072	Phospholipase D signaling pathway	6.73887e-05	0.00224469	PTGFR|HRAS|PDGFRA|HGF|PLCG1|DNM3|ADCY2|FCER1A|CXCR1|DGKI|GRM8|DGKB|PLPP3|SHC1|PRKCA|CYTH1|ADCY4|PLD1|PLD2|PIP5K1A|ADCY8|KIT|GNA13|LPAR3|RHEB	25/148
hsa05169	Epstein-Barr virus infection	0.000101977	0.00316477	CCN1|PSMD4|CD58|NFKB2|NFKBIE|MAPK14|MAP2K6|MAP2K4|ECD|BCL2L11|CCNA1|CCNE2|CCNE1|JUN|JAK1|RELB|LYN|SKP2|MDM2|MYC|SEM1|TP53|TRAC|IRF9|IL6|CDK4|CDK6|CD19|HLA-DMB|HLA-DMA	30/201
hsa01522	Endocrine resistance	0.000102191	0.00316477	ADCY4|CDKN2C|PTK2|TP53|SHC1|ADCY2|NCOA3|ADCY8|HRAS|JUN|NOTCH2|MAPK14|MED1|CDK4|PRKACB|HGF|MDM2|JAG1|NCOR1	19/98
hsa04014	Ras signaling pathway	0.000107803	0.00332154	PDGFRA|HRAS|RAP1B|RAPGEF5|PLCG1|NTRK2|RASAL2|FLT3|PLA2G12B|GNG12|ETS2|PLA2G5|FGF10|KDR|SHC1|PRKCA|EFNA4|PLA2G2A|PLA2G2C|STK4|HGF|ANGPT1|VEGFA|PLD1|PLD2|KIT|MET|GNG2|GNGT1|PRKACB|FASLG|FGF21|CDC42	33/232
hsa04750	Inflammatory mediator regulation of TRP channels	0.000128817	0.0038326	CYP2J2|PRKCH|CYP4A11|GNAQ|ADCY2|PTGER4|ADCY4|CAMK2G|ADCY8|MAPK14|PRKCA|PLCG1|MAP2K6|PRKACB|ITPR2|TRPA1|TRPV1|IL1R1|ALOX12	19/100
hsa04022	cGMP-PKG signaling pathway	0.00015824	0.00442036	NFATC4|VDAC2|GNAI1|MYH6|MYH7|SLC8A1|SLC8A3|NPPC|ATP1A2|ATP1A1|CREB5|ATP1B2|MYLK3|ATP1B1|ITPR2|GATA4|GNAQ|ADCY4|KCNMB4|ADCY2|ADCY8|MEF2A|ATP1A4|GNA13|CREB3L4|MEF2D	26/167
hsa05225	Hepatocellular carcinoma	0.000172143	0.00465099	GSTA5|HRAS|GSTA1|GSTA2|PLCG1|FZD10|FZD1|FZD5|FZD6|FRAT1|FZD8|FZD9|WNT8B|MYC|SHC1|PRKCA|ARID2|HGF|CSNK1A1L|TP53|FZD7|MET|FRAT2|CDK4|CDK6|WNT16	26/168
hsa04926	Relaxin signaling pathway	0.000174826	0.00465099	HRAS|MAPK14|MAP2K4|COL3A1|GNAI1|JUN|GNG12|GNG2|SHC1|PRKCA|CREB5|PRKACB|PRKCZ|VEGFA|HGF|GNGT1|ADCY4|ADCY2|ADCY8|COL1A2|CREB3L4|COL1A1	22/130
hsa04261	Adrenergic signaling in cardiomyocytes	0.000177039	0.0046892	MAPK14|GNAI1|MYH6|MYH7|CACNB2|TPM3|SLC8A1|SLC8A3|CREB3L4|PRKCA|CREB5|CAMK2G|ATP1B2|ATP1B1|CACNA2D1|CACNA2D4|ADCY4|GNAQ|ADCY2|ADCY8|ATP1A4|ATP1A2|ATP1A1|PRKACB	24/149
hsa05166	Human T-cell leukemia virus 1 infection	0.000184926	0.00481367	NFATC4|CCN1|HRAS|CRTC2|MAP2K4|VDAC2|IL1R2|IL1R1|CCNA1|CCNE2|CCNE1|JUN|ETS2|JAK1|RELB|MYC|CDKN2C|CREB5|NFKB2|ADCY4|TP53|ADCY2|IL15RA|ADCY8|IL6|EGR2|CDK4|CREB3L4|PRKACB|HLA-DMB|HLA-DMA	31/219
hsa04010	MAPK signaling pathway	0.000215555	0.00540139	PDGFRA|MAP4K4|HRAS|MKNK1|RAP1B|MAPK14|GNG12|MAP2K4|FLT3|IL1R1|MECOM|CACNB2|JUN|CACNA1E|NTRK2|VEGFA|DUSP8|SCT|NFKB2|FGF10|KDR|PRKCA|EFNA4|STK4|RELB|HGF|CACNA2D1|MYC|CACNA2D4|ANGPT1|TP53|MAP2K6|KIT|MET|PRKACB|FASLG|FGF21|CDC42	38/295
hsa05217	Basal cell carcinoma	0.000242664	0.00595711	FZD1|BMP4|TP53|BMP2|FZD6|FZD7|FZD8|FZD9|WNT8B|GLI1|SUFU|WNT16|FZD10|FZD5	14/63
hsa04713	Circadian entrainment	0.000247078	0.0059924	ADCY4|ADCY10|GNAQ|RASD1|KCNJ6|PRKCA|CAMK2G|ADCY8|GNG12|PER2|GNG2|GNGT1|PRKACB|GRIN2D|ADCYAP1R1|NOS1AP|ADCY2|GNAI1	18/97
hsa04640	Hematopoietic cell lineage	0.000247078	0.0059924	IL7R|IL6R|CD1E|FLT3|CD2|CD19|CD1A|CD1D|KIT|IL6|IL7|FCGR1A|CD1B|CD1C|HLA-DMB|IL1R2|IL1R1|HLA-DMA	18/97
hsa00280	Valine, leucine and isoleucine degradation	0.000264551	0.00631472	HMGCS1|MMUT|ALDH3A2|AUH|BCAT2|ALDH2|AGXT2|ECHS1|OXCT1|ALDH9A1|HMGCLL1|HIBADH	12/48
hsa04912	GnRH signaling pathway	0.000422512	0.00859107	ADCY4|CAMK2G|GNAQ|PLD2|PRKCA|PLD1|HRAS|MAP2K4|JUN|MAPK14|ITPR2|MAP2K6|PRKACB|HGF|ADCY8|ADCY2|CDC42	17/93
hsa04550	Signaling pathways regulating pluripotency of stem cells	0.000435544	0.0087675	SMAD9|NODAL|HRAS|MAPK14|LIFR|FZD10|FZD1|FZD5|FZD6|FZD7|FZD8|FZD9|INHBA|WNT8B|POU5F1B|INHBE|JAK1|MYC|SETDB1|BMP4|PCGF6|WNT16	22/140
hsa04062	Chemokine signaling pathway	0.000439861	0.00882498	PTK2|GSK3A|HRAS|RAP1B|WASL|GNAI1|CCL28|GRK5|XCL1|GNG12|XCL2|CXCR1|LYN|SHC1|SCYL3|PRKCZ|HGF|CXCL13|CXCL16|ADCY4|ADCY2|VAV3|ADCY8|GNG2|GNGT1|PRKACB|CDC42	27/190
hsa04725	Cholinergic synapse	0.000456513	0.00912876	ADCY4|KCNJ2|CHRNB2|GNAQ|ADCY2|KCNJ6|PRKCA|HRAS|CAMK2G|ADCY8|KCNQ3|GNG12|GNG2|GNGT1|PRKACB|ITPR2|CREB3L4|CREB5|GNAI1	19/112
hsa04360	Axon guidance	0.000480548	0.00942218	PTK2|NFATC4|HRAS|PLCG1|SEMA4A|SEMA6C|SEMA4G|NTNG1|PARD6G|GDF7|PARD6B|PARD6A|SLIT1|GNAI1|EFNA4|NGEF|PRKCA|CAMK2G|PRKCZ|SEMA3A|SEMA3C|SEMA3E|SEMA3D|SEMA5A|MET|CDC42	26/181
hsa05146	Amoebiasis	0.000523315	0.00984517	IFNG|CD1D|PTK2|GNAQ|CD1A|PRKCA|COL1A1|C8B|IL6|C8A|C9|COL1A2|PRKACB|LAMB1|COL3A1|IL1R2|IL1R1	17/95
hsa04024	cAMP signaling pathway	0.000552818	0.0102722	RAP1B|SOX9|ADCY10|TSHR|ADCYAP1R1|ADCY2|GNAI1|ADORA2A|CNGB3|JUN|PTGER3|GLI1|GLP1R|ATP1A1|CREB3L4|CREB5|CAMK2G|ATP1B2|ATP1B1|ADCY4|PLD1|PLD2|VAV3|ADCY8|ATP1A4|ATP1A2|GRIN2D|PRKACB|PDE4B	29/214
hsa05215	Prostate cancer	0.00064413	0.0114746	PDGFRA|ETV5|NKX3-1|CCNE2|HRAS|CCNE1|PLAU|HSP90AB1|ERG|CREB5|INSRR|CREB3L4|HGF|TP53|MDM2|TMPRSS2|IL1R2	17/97
hsa04659	Th17 cell differentiation	0.000693902	0.0121816	HSP90AB1|RUNX1|IFNG|AHR|RXRG|JUN|NFKBIE|MAPK14|IL6|PLCG1|IL22|ROR1|JAK1|IL6R|HLA-DMB|RORC|IL1R1|HLA-DMA	18/107
hsa00565	Ether lipid metabolism	0.000757309	0.0128106	ENPP2|PLPP3|PLD1|PLD2|PLA2G12B|CEPT1|PLA2G2A|PLA2G7|PLA2G2C|PLA2G5|LPCAT1	11/47
hsa04371	Apelin signaling pathway	0.000772475	0.0129617	ADCY4|ADCY10|JAG1|PRKAB2|GNAQ|ADCY2|HRAS|MEF2D|ADCY8|MYLK3|GNG12|ITPR2|MEF2A|GNG2|PRKAA1|GNGT1|PRKACB|SLC8A1|SLC8A3|GNA13|GNAI1	21/137
hsa05203	Viral carcinogenesis	0.000945028	0.0151783	CCN1|HDAC9|HRAS|YWHAZ|SKP2|CCNA1|CCNE2|CCNE1|JUN|GTF2B|JAK1|YWHAB|ATP6V0D2|LYN|CDK6|CREB5|SND1|MDM2|NFKB2|UBR4|TP53|IRF9|EGR2|CDK4|CREB3L4|PRKACB|CDC42	27/201
hsa04218	Cellular senescence	0.00097742	0.0155743	NFATC4|CCN1|HRAS|MAPK14|HIPK1|MAP2K6|VDAC2|MDM2|CCNA1|CCNE2|CCNE1|NBN|MYC|ZFP36L1|ITPR2|GATA4|E2F5|TP53|IL6|CDK4|CDK6|MCU|RHEB	23/160
hsa04270	Vascular smooth muscle contraction	0.00115396	0.0175094	ADCY4|ARHGEF11|PRKCH|CYP4A11|GNAQ|ADCY2|ADORA2A|PRKCA|PLA2G12B|RAMP1|MYLK3|PLA2G2A|ADCY8|PLA2G2C|PLA2G5|GNA13|PRKACB|ITPR2|NPPC|KCNMB4	20/132
hsa04350	TGF-beta signaling pathway	0.00120278	0.0180784	BMP5|BMP4|BMP2|BMP8B|IFNG|NODAL|GDF7|E2F5|GDF5|GDF6|INHBA|HJV|INHBE|MYC|BMP8A|SMAD9	16/94
hsa05161	Hepatitis B	0.00121913	0.0182235	NFATC4|CCN1|HRAS|MAPK14|MAP2K6|MAP2K4|YWHAZ|CCNA1|CCNE2|CCNE1|JUN|JAK1|YWHAB|MYC|PRKCA|CREB5|FASLG|HGF|TP53|TIRAP|IL6|EGR2|CREB3L4	23/163
hsa04150	mTOR signaling pathway	0.00123993	0.0183529	HRAS|ATP6V1H|PRKAA1|FZD10|RICTOR|FZD1|SKP2|FZD5|FZD6|FZD7|FZD8|FZD9|WNT8B|NPR3|PRKCA|HGF|EIF4E2|DEPTOR|TTI1|WNT16|ATP6V1C1|RHEB	22/153
hsa04921	Oxytocin signaling pathway	0.00123993	0.0183529	NFATC4|CAMK1D|RCAN1|HRAS|PRKAA1|GNAI1|CACNB2|JUN|PRKAB2|PRKCA|CAMK2G|MYLK3|ITPR2|CACNA2D1|CACNA2D4|KCNJ6|ADCY4|KCNJ2|GNAQ|ADCY2|ADCY8|PRKACB	22/153
hsa00310	Lysine degradation	0.00129037	0.0187321	COLGALT2|ASH1L|KMT2E|ECHS1|ALDH3A2|ALDH2|DHTKD1|AASS|ALDH9A1|PRDM2|SETD3|SETDB1	12/59
hsa04724	Glutamatergic synapse	0.00131988	0.0190687	ADCY4|SAT2|GRM8|GNAQ|PLD2|PRKCA|GRIK1|ADCY8|GNG12|GNG2|GNGT1|PRKACB|ITPR2|GRIN2D|PLD1|SLC1A3|ADCY2|GNAI1	18/114
hsa04611	Platelet activation	0.00134678	0.0191463	ADCY4|STIM1|GNAQ|ADCY2|RAP1B|COL1A1|ADCY8|MYLK3|FCGR2A|MAPK14|P2RX1|PRKCZ|COL1A2|GNA13|PRKACB|ITPR2|COL3A1|LYN|GNAI1	19/124
hsa04612	Antigen processing and presentation	0.0013747	0.0193968	NFYC|CTSL|KLRC4|IFNG|RFX5|CTSB|PSME2|PSME1|HSP90AB1|NFYA|CTSS|HLA-DMB|RFXAP|HLA-DMA	14/77
hsa01521	EGFR tyrosine kinase inhibitor resistance	0.00170127	0.0229876	PDGFRA|EIF4E2|BCL2L11|SHC1|PRKCA|HRAS|IL6R|IL6|MET|PLCG1|VEGFA|JAK1|HGF|KDR	14/79
hsa05231	Choline metabolism in cancer	0.0019312	0.0253533	PLPP3|SLC44A3|PLD1|PLD2|PRKCA|PIP5K1A|JUN|PDGFRA|DGKB|PLCG1|DGKI|WASL|HGF|RHEB|HRAS|SLC44A5	16/99
hsa04070	Phosphatidylinositol signaling system	0.0019312	0.0253533	INPP5D|PI4KB|IMPA1|PRKCA|PIP4P2|PIP5K1A|PLCG1|INPP4A|ITPR2|PLCD4|DGKI|IMPAD1|IP6K1|PI4K2A|DGKB|PIP4K2C	16/99
hsa04932	Non-alcoholic fatty liver disease (NAFLD)	0.00196488	0.0255731	IL6R|ADIPOR2|NDUFB9|GSK3A|JUN|CYP2E1|LEPR|IL6|BCL2L11|NDUFS2|SREBF1|FASLG|PRKAA1|NDUFS6|PRKAB2|NDUFA4L2|NDUFA9|UQCRB|UQCRFS1|COX6C|CDC42	21/149
hsa04976	Bile secretion	0.00211956	0.0269893	ADCY4|CA2|ADCY2|ATP1B2|ABCB4|ADCY8|AQP8|ATP1B1|ATP1A4|ATP1A2|ATP1A1|PRKACB|CYP7A1	13/72
hsa04080	Neuroactive ligand-receptor interaction	0.00212286	0.0269893	NOP9|PTGFR|CHRNB2|GHR|CHRNA10|PRSS1|LTB4R|C5AR1|P2RX1|TSHR|ADCYAP1R1|ADORA2A|NPY4R|PTGER4|TAC1|TAC3|PTGER3|GRM8|GLP1R|TRPV1|UTS2|CHRND|LEPR|OPRK1|NPFFR1|TACR2|TRHR|NMUR1|GRIK1|DRD4|GLUD1|PRLR|PRLHR|GRIN2D|CHRNE|LPAR3|MLNR|CALCR	38/338
hsa00910	Nitrogen metabolism	0.00225045	0.0276961	CA8|CA3|CA2|CA1|CA14|CA13	6/17
hsa04666	Fc gamma R-mediated phagocytosis	0.00293034	0.0336432	PLPP3|INPP5D|PLD1|PLD2|PRKCA|PIP5K1A|FCGR3A|FCGR2A|PLCG1|WASL|FCGR1A|ASAP1|LYN|VAV3|CDC42	15/94
hsa04110	Cell cycle	0.00299907	0.0341081	YWHAZ|CDKN2C|E2F5|TP53|CCN1|CCNA1|CCNE2|CCNE1|CDC14A|PRKDC|CDK4|CDK6|SKP2|YWHAB|RAD21|MDM2|MYC|CDC7	18/124
hsa05414	Dilated cardiomyopathy (DCM)	0.0034964	0.0387426	ADCY4|MYH6|MYH7|ADCY2|ADCY8|DES|TPM3|SGCB|CACNB2|ITGA10|PRKACB|SLC8A1|SLC8A3|CACNA2D1|CACNA2D4	15/96
hsa00790	Folate biosynthesis	0.00352852	0.0387431	ALPP|PCBD1|MOCS2|MOCS1|ALPG|ALPI|GGH	7/26
hsa04915	Estrogen signaling pathway	0.00393839	0.0415077	NCOA2|ADCY4|EBAG9|FKBP5|GNAQ|ADCY2|NCOA3|ADCY8|HRAS|JUN|HSP90AB1|ITPR2|KCNJ6|CREB3L4|PRKACB|HGF|CREB5|SHC1|GNAI1	19/138
hsa04924	Renin secretion	0.00403762	0.0424794	KCNJ2|ADCYAP1R1|GNAQ|PTGER4|CTSB|CLCA2|PRKACB|ITPR2|CLCA1|PDE1C|CLCA4|GNAI1	12/69
hsa04211	Longevity regulating pathway	0.00444668	0.0456306	ADCY4|EIF4E2|PRKAB2|TP53|ADCY2|HRAS|ADCY8|PRKAA1|CREB3L4|PRKACB|ADIPOR2|RB1CC1|RHEB|CREB5	14/89
hsa05120	Epithelial cell signaling in Helicobacter pylori infection	0.00446928	0.0456306	IGSF5|JUN|ATP6V1H|PLCG1|MAPK14|MET|CXCR1|MAP2K4|ATP6V0D2|ATP6V1C1|LYN|CDC42	12/70
hsa00230	Purine metabolism	0.0046739	0.0471214	ADCY4|NME7|POMP|ADCY10|ADCY2|PRPS1L1|ENPP4|ADCY8|PGM1|AK5|PDE7A|PDE1C|URAD|RRM2B|PDE6D|PRUNE1|GMPR2|PDE4B	18/130
hsa05410	Hypertrophic cardiomyopathy (HCM)	0.00485262	0.0480672	PRKAB2|MYH7|CACNB2|DES|TPM3|SGCB|PRKAA1|IL6|ITGA10|SLC8A1|MYH6|SLC8A3|CACNA2D1|CACNA2D4	14/90
hsa04933	AGE-RAGE signaling pathway in diabetic complications	0.00489769	0.0482498	IL6|VEGFA|PRKCA|SELE|HRAS|JUN|PLCG1|MAPK14|PLCD4|PRKCZ|CDK4|COL1A1|COL3A1|COL1A2|CDC42	15/100
hsa05032	Morphine addiction	0.00528795	0.0501279	ADCY4|KCNJ6|ADCY2|PRKCA|GRK5|ADCY8|GNG12|PDE7A|PDE1C|GNG2|GNGT1|PRKACB|PDE4B|GNAI1	14/91
hsa04068	FoxO signaling pathway	0.00537894	0.0504401	IL7R|IL6|BCL6|PRKAB2|FOXG1|SLC2A4|PRKAA1|MAPK14|AGAP2|STK4|FBXO32|SKP2|HGF|FASLG|MDM2|BCL2L11|HRAS|BNIP3	18/132
hsa04115	p53 signaling pathway	0.00544307	0.0509624	TP53|CCNE2|CCNE1|AIFM2|PIDD1|SHISA5|CDK4|CDK6|GORAB|RRM2B|MDM2|ADGRB1	12/72
hsa02010	ABC transporters	0.00553113	0.0512309	ABCA10|ABCA13|ABCA6|ABCA4|ABCB4|ABCD3|ABCD2|ABCA8|ABCA9	9/45
hsa03050	Proteasome	0.00553113	0.0512309	ECD|IFNG|PSMD4|PSME2|PSME1|PSMB6|PSMB4|C6|SEM1	9/45
hsa00591	Linoleic acid metabolism	0.00586481	0.0535009	CYP2J2|PLA2G12B|PLA2G2C|CYP2E1|PLA2G2A|ALOX15|PLA2G5	7/29
hsa00604	Glycosphingolipid biosynthesis - ganglio series	0.00638664	0.0565527	ST3GAL1|ST6GALNAC3|ST6GALNAC5|ST8SIA1|B4GALNT1	5/15
hsa04514	Cell adhesion molecules (CAMs)	0.00673106	0.0584035	SELL|F3|NTNG1|MPZL1|NRCAM|HLA-DMB|SDC2|SDC4|CD58|NEGR1|CLDN23|PVR|CNTN1|CD2|SELE|PDCD1|SELP|CADM3|HLA-DMA	19/146
hsa04726	Serotonergic synapse	0.00708349	0.0605052	CYP2J2|KCND2|GNAQ|KCNJ6|PRKCA|HRAS|GNG12|ALOX15|ALOX12|GNG2|CYP2C18|GNGT1|PRKACB|ITPR2|CYP4X1|GNAI1	16/115
hsa05214	Glioma	0.00721179	0.0615141	PDGFRA|TP53|SHC1|PRKCA|HRAS|CAMK2G|PLCG1|CDK4|CDK6|HGF|MDM2|CAMK1D	12/75
hsa04964	Proximal tubule bicarbonate reclamation	0.00770647	0.0649085	CA2|ATP1B2|ATP1B1|ATP1A4|ATP1A2|ATP1A1	6/23
hsa03020	RNA polymerase	0.0079626	0.0654184	POLR3GL|POLR3D|POLR1C|POLR3C|TWISTNB|POLR3A|POLR2K	7/31
hsa04710	Circadian rhythm	0.0079626	0.0654184	PRKAB2|CLOCK|BHLHE41|RORC|PRKAA1|PER2|ROR1	7/31
hsa00830	Retinol metabolism	0.00837292	0.0680539	CYP4A11|SDR16C5|RPE65|DHRS4|UGT1A8|CYP26A1|UGT1A4|RDH10|CYP2C18|ALDH1A1|CYP26C1	11/67
hsa05206	MicroRNAs in cancer	0.00855755	0.0693922	MIR30D|MMP16|TIMP3|MIR30B|ZFPM2|HRAS|PDGFRA|SPRY2|PLCG1|MCL1|TP63|MIRLET7F2|BCL2L11|CCNE2|CCNE1|MIR26A2|MYC|SHC1|TNR|PRKCA|MIR124-2|HMGA2|PLAU|VEGFA|HGF|TP53|MDM2|CYP24A1|DICER1|NOTCH2|MET|CDK6	32/299
hsa04630	Jak-STAT signaling pathway	0.00916973	0.0718558	IL7R|PDGFRA|GHR|PIAS3|PRLR|IRF9|HRAS|IFNG|LEPR|IL6|IL7|IL22|LIFR|JAK1|HGF|MYC|IL6R|IL15RA|OSMR|MCL1	20/162
hsa04664	Fc epsilon RI signaling pathway	0.00919764	0.0718558	INPP5D|PRKCA|VAV3|MAPK14|PLCG1|MAP2K6|MAP2K4|HGF|FCER1A|LYN|HRAS	11/68
hsa04722	Neurotrophin signaling pathway	0.00937935	0.0731808	TP53|SHC1|HRAS|CAMK2G|JUN|RAP1B|NTRK2|NFKBIE|MAPK14|SORT1|PLCG1|RIPK2|FASLG|HGF|FRS2|CDC42	16/119
hsa04066	HIF-1 signaling pathway	0.00973076	0.0749148	EIF4E2|ARNT|PRKCA|CAMK2G|MKNK1|IL6R|IL6|HKDC1|PLCG1|VEGFA|ELOC|IFNG|ANGPT1|PGK2|LDHB	15/109
hsa05230	Central carbon metabolism in cancer	0.0100836	0.076694	SIRT3|PDGFRA|TP53|HKDC1|HRAS|KIT|MET|SLC1A5|MYC|FLT3|LDHB	11/69
hsa04728	Dopaminergic synapse	0.010227	0.0771779	GNAQ|CLOCK|PRKCA|KIF5A|DRD4|CAMK2G|GSK3A|GNG12|MAPK14|GNG2|KCNJ6|GNGT1|PRKACB|ITPR2|CREB3L4|CREB5|GNAI1	17/131
hsa03013	RNA transport	0.0108782	0.0789583	EIF3H|NUP88|PABPC3|XPO5|NUP210L|NUP98|SRRM1|PABPC1|ACIN1|EIF1AX|EIF3E|PAIP1|NUP43|EIF4G3|NUP107|EIF4E2|MAGOHB|SAP18|EIF4EBP2|EIF2S2	20/165
hsa04510	Focal adhesion	0.0109057	0.0790629	PDGFRA|PTK2|HRAS|RAP1B|ITGA10|LAMB1|ARHGAP5|CAV1|JUN|THBS3|SCT|KDR|SHC1|TNR|PRKCA|MYLK3|VEGFA|HGF|VAV3|MET|COL1A2|COL1A1|CDC42	23/199
hsa04970	Salivary secretion	0.0110276	0.0794544	ADCY4|GNAQ|ADCY2|PRKCA|ATP1B2|ADCY8|LYZ|ATP1B1|ATP1A4|ATP1A2|ATP1A1|PRKACB|ITPR2	13/90
hsa05152	Tuberculosis	0.0126111	0.085764	NFYC|TIRAP|IFNG|RFX5|CAMK2G|FCGR3A|ATP6V1H|FCGR2A|MAPK14|IL6|NFYA|RIPK2|CYP27B1|FCGR1A|JAK1|ATP6V0D2|CTSS|HLA-DMB|BCL10|RFXAP|HLA-DMA	21/179
hsa04210	Apoptosis	0.0139378	0.0930746	CTSL|TUBA3C|CTSK|BCL2L11|GZMB|PARP4|CTSB|JUN|PIDD1|SPTA1|TNFRSF10A|FASLG|MCL1|ITPR2|TP53|CTSS|HRAS	17/136
hsa04973	Carbohydrate digestion and absorption	0.0139481	0.0930746	AMY2B|SLC37A4|HKDC1|ATP1B2|ATP1B1|ATP1A4|ATP1A2|ATP1A1	8/44
hsa04623	Cytosolic DNA-sensing pathway	0.0141438	0.0934118	ADAR|RIPK3|POLR3GL|AIM2|IL6|POLR3D|POLR1C|POLR3C|POLR3A|POLR2K	10/63
hsa00100	Steroid biosynthesis	0.0142593	0.0934118	HSD17B7|CYP24A1|FDFT1|CYP27B1|SQLE	5/19
hsa04723	Retrograde endocannabinoid signaling	0.0146991	0.0934118	ADCY4|GNAQ|NDUFB9|KCNJ6|PRKCA|NDUFS6|ADCY8|GNG12|NDUFA9|MAPK14|NDUFS2|GNG2|GNGT1|PRKACB|ITPR2|NDUFA4L2|ADCY2|GNAI1	18/148
hsa04927	Cortisol synthesis and secretion	0.0168948	0.101569	ADCY4|GNAQ|ADCY2|CREB5|ADCY8|CYP17A1|CREB3L4|PRKACB|ITPR2|PBX1	10/65
hsa05321	Inflammatory bowel disease (IBD)	0.0168948	0.101569	IL18RAP|IFNG|RORC|JUN|IL18R1|IL6|IL22|HLA-DMB|ROR1|HLA-DMA	10/65
hsa04217	Necroptosis	0.0170659	0.102142	CAMK2G|SPATA2L|PARP4|CHMP7|TNFRSF10A|CHMP4C|ALOX15|HSP90AB1|FAF1|MACROH2A2|FASLG|SMPD1|JAK1|IFNG|VDAC2|PYGL|IRF9|RIPK3|RNF31	19/162
hsa04960	Aldosterone-regulated sodium reabsorption	0.0175401	0.104003	FXYD4|PRKCA|ATP1B2|ATP1B1|ATP1A4|ATP1A2|ATP1A1	7/37
hsa05167	Kaposi sarcoma-associated herpesvirus infection	0.0179645	0.104447	IL6|NFATC4|CDK6|RCAN1|IRF9|HRAS|JAK1|JUN|GNG12|MAPK14|VEGFA|PLCG1|CDK4|MAP2K6|GNGT1|MAP2K4|ITPR2|GNG2|LYN|MYC|TP53	21/186
hsa05220	Chronic myeloid leukemia	0.0182394	0.104803	TP53|SHC1|MECOM|HRAS|RUNX1|CDK4|CTBP2|CDK6|HGF|MDM2|MYC	11/76
hsa04145	Phagosome	0.0183452	0.105281	SFTPD|SEC22B|TUBA3C|CTSL|DYNC1I1|FCGR3A|PSAP|THBS3|FCGR2A|ATP6V1H|SFTPA2|FCGR1A|ATP6V0D2|ATP6V1C1|CTSS|HLA-DMB|SEC61A2|HLA-DMA	18/152
hsa00564	Glycerophospholipid metabolism	0.0183977	0.105281	PTDSS1|PLPP3|PLD1|PLD2|PLA2G12B|CEPT1|PLA2G2A|PLA2G2C|DGKI|ETNK1|LPCAT1|DGKB|PLA2G5	13/97
hsa05221	Acute myeloid leukemia	0.0184097	0.105281	CCNA1|HRAS|KIT|PER2|RUNX1|RUNX1T1|FCGR1A|HGF|MYC|FLT3	10/66
hsa04071	Sphingolipid signaling pathway	0.0188528	0.107713	FCER1A|GNAQ|PLD2|PRKCA|PLD1|HRAS|MAPK14|PRKCZ|SMPD1|GNA13|SPTLC1|TP53|NSMAF|CERS2|GNAI1	15/119
hsa05012	Parkinson disease	0.0196941	0.110442	ADORA2A|LRRK2|NDUFB9|PRKN|ATP5PB|NDUFA9|UBA7|NDUFS2|UBE2G2|NDUFS6|PRKACB|VDAC2|NDUFA4L2|UQCRB|UQCRFS1|COX6C|GNAI1	17/142
hsa00240	Pyrimidine metabolism	0.0199143	0.110442	NME7|POMP|DPYD|DHODH|UCK2|DPYS|RRM2B|DTYMK|DCTPP1	9/57
hsa04650	Natural killer cell mediated cytotoxicity	0.0199307	0.110442	SHC1|GZMB|KLRK1|PRKCA|VAV3|IFNG|FCGR3A|NCR2|PLCG1|CD244|SH2D1B|TNFRSF10A|FASLG|HGF|HRAS|CD48	16/131
hsa04540	Gap junction	0.0205698	0.11111	ADCY4|TUBA3C|GNAQ|ADCY2|PRKCA|HRAS|ADCY8|PDGFRA|ITPR2|PRKACB|HGF|GNAI1	12/88
hsa04061	Viral protein interaction with cytokine and cytokine receptor	0.0225005	0.117646	SCYL3|IL18RAP|XCL2|CXCR1|IL18R1|IL37|IL6|CCL28|TNFRSF10A|XCL1|TNFRSF10D|CXCL13|IL6R	13/100
hsa00983	Drug metabolism - other enzymes	0.0229364	0.119614	NME7|DPYD|GSTA5|UCK2|GSTA1|GSTA2|DPYS|UGT1A8|CYP2E1|UGT1A4|RRM2B	11/79
hsa04610	Complement and coagulation cascades	0.0229364	0.119614	SERPINA1|F5|MASP1|PLAU|C8A|C9|C5AR1|C8B|C1S|CLU|C7	11/79
hsa00270	Cysteine and methionine metabolism	0.0233765	0.120969	AHCYL1|GCLC|BCAT2|AGXT2|GOT2|KYAT3|MAT1A|LDHB	8/49
hsa05144	Malaria	0.0233765	0.120969	KLRK1|SELE|SDC2|THBS3|IL6|MET|IFNG|SELP	8/49
hsa05211	Renal cell carcinoma	0.0235523	0.12167	ARNT|HRAS|JUN|RAP1B|MET|VEGFA|ELOC|HGF|HLF|CDC42	10/69
hsa04216	Ferroptosis	0.0245423	0.125709	TP53|SLC39A14|GCLC|ACSL5|ALOX15|VDAC2|MAP1LC3C	7/40
hsa05323	Rheumatoid arthritis	0.0253227	0.128184	CTSK|CTSL|IFNG|JUN|ATP6V1H|IL6|VEGFA|ATP6V0D2|ATP6V1C1|ANGPT1|HLA-DMB|HLA-DMA	12/91
hsa00603	Glycosphingolipid biosynthesis - globo and isoglobo series	0.0267859	0.128801	B3GALT5|ST3GAL1|FUT2|ST8SIA1	4/15
hsa04975	Fat digestion and absorption	0.0272486	0.129673	PNLIPRP1|PLPP3|PLA2G12B|PLA2G2A|PLA2G2C|PLA2G5|GOT2	7/41
hsa03440	Homologous recombination	0.0272486	0.129673	ECD|RAD54B|NBN|BABAM2|TOP3A|RAD51B|SEM1	7/41
hsa00982	Drug metabolism - cytochrome P450	0.0296577	0.139163	FMO2|FMO3|FMO1|FMO5|GSTA5|GSTA1|GSTA2|UGT1A8|CYP2E1|UGT1A4	10/72
hsa04742	Taste transduction	0.0304971	0.142197	ADCY4|CALHM1|TAS2R9|PDE1C|TAS2R20|ADCY8|TAS2R1|KCNK5|PKD2L1|PRKACB|TAS2R7	11/83
hsa04146	Peroxisome	0.0304971	0.142197	PMP22|PEX2|DHRS4|HMGCLL1|ACSL5|PEX19|PEX11B|FAR2|ABCD3|ABCD2|PHYH	11/83
hsa00410	beta-Alanine metabolism	0.0313672	0.144397	DPYD|ALDH3A2|ALDH2|DPYS|ECHS1|ALDH9A1	6/33
hsa04380	Osteoclast differentiation	0.0316329	0.144397	CTSK|IFNG|FCGR3A|CALCR|JAK1|JUN|FCGR2A|MAPK14|MAP2K6|FCGR1A|TREM2|RELB|NFKB2|IRF9|IL1R1	15/128
hsa00730	Thiamine metabolism	0.0318857	0.144397	ALPI|ALPP|ALPG|AK5	4/16
hsa00590	Arachidonic acid metabolism	0.0330328	0.149092	CYP2J2|CYP4A11|PLA2G12B|PLA2G2C|CYP2E1|PLA2G2A|ALOX15|PLA2G5|ALOX12	9/63
hsa04940	Type I diabetes mellitus	0.0332533	0.149174	GZMB|IFNG|ICA1|FASLG|PTPRN|HLA-DMB|HLA-DMA	7/43
hsa04978	Mineral absorption	0.0336016	0.149174	ATP1B2|ATP1B1|STEAP1|ATP1A4|ATP1A2|ATP1A1|SLC8A1|SLC8A3	8/53
hsa00562	Inositol phosphate metabolism	0.0343024	0.14946	INPP5D|PI4KB|PIP5K1A|PLCG1|INPP4A|IMPA1|PLCD4|IMPAD1|PI4K2A|PIP4K2C	10/74
hsa05100	Bacterial invasion of epithelial cells	0.0343024	0.14946	PTK2|SHC1|CD2AP|MET|WASL|DNM3|CAV1|RHOG|ELMO2|CDC42	10/74
hsa04012	ErbB signaling pathway	0.0348786	0.151483	PTK2|SHC1|PRKCA|HRAS|CAMK2G|JUN|PLCG1|MAP2K4|HGF|MYC|NRG3	11/85
hsa05020	Prion diseases	0.0389739	0.163674	C8B|IL6|C8A|C9|PRKACB|C7	6/35
hsa04923	Regulation of lipolysis in adipocytes	0.0397035	0.16492	ADCY4|ADCY2|ADCY8|PTGER3|FABP4|PRKACB|TSHR|GNAI1	8/55
hsa00190	Oxidative phosphorylation	0.0410107	0.168708	UQCRFS1|NDUFB9|LHPP|ATP6V1H|ATP5PB|NDUFA9|NDUFS2|NDUFS6|COX10|ATP6V0D2|NDUFA4L2|ATP12A|UQCRB|ATP6V1C1|COX6C	15/133
hsa05223	Non-small cell lung cancer	0.0414326	0.168831	TP53|PRKCA|HRAS|RXRG|PLCG1|STK4|CDK6|HGF|CDK4	9/66
hsa05016	Huntington disease	0.0417924	0.168831	AP2S1|TP53|GNAQ|NDUFB9|DNAH5|DNAH8|CREB3L4|ATP5PB|NDUFA9|NDUFS2|CREB5|POLR2K|NDUFS6|AP2A2|DCTN2|VDAC2|NDUFA4L2|UQCRB|UQCRFS1|COX6C	20/193
hsa00072	Synthesis and degradation of ketone bodies	0.0423545	0.168831	HMGCS1|OXCT1|HMGCLL1	3/10
hsa04720	Long-term potentiation	0.0445252	0.174263	GNAQ|PRKCA|HRAS|CAMK2G|ADCY8|RAP1B|GRIN2D|PRKACB|ITPR2	9/67
hsa04727	GABAergic synapse	0.0449327	0.174867	ADCY4|SAT2|KCNJ6|ADCY2|PRKCA|ADCY8|GNG12|GNG2|GNGT1|PRKACB|GNAI1	11/89
hsa00053	Ascorbate and aldarate metabolism	0.045027	0.174867	ALDH3A2|UGT1A4|UGT1A8|ALDH9A1|ALDH2	5/27
hsa05340	Primary immunodeficiency	0.047659	0.18339	IL7R|RFX5|TNFRSF13B|DCLRE1C|RFXAP|CD19	6/37
hsa05143	African trypanosomiasis	0.047659	0.18339	GNAQ|PRKCA|SELE|IL6|IFNG|FASLG	6/37
hsa05150	Staphylococcus aureus infection	0.0477683	0.18339	HLA-DMB|FCGR3A|MASP1|FCGR2A|C5AR1|FCGR1A|C1S|SELP|HLA-DMA	9/68
hsa04910	Insulin signaling pathway	0.0498238	0.190126	MKNK1|PRKAB2|SHC1|HKDC1|HRAS|SLC2A4|PRKAA1|EIF4E2|SREBF1|PRKAR1A|PRKACB|HGF|RHEB|PYGL|PRKCZ	15/137
hsa03015	mRNA surveillance pathway	0.050636	0.190191	SMG5|FIP1L1|SMG7|PABPC3|SRRM1|MSI2|ACIN1|MAGOHB|SAP18|PABPC1|CPSF6	11/91
hsa04920	Adipocytokine signaling pathway	0.0511639	0.190191	ACSL5|RXRG|ADIPOR2|SLC2A4|AGRP|LEPR|PRKAA1|PRKAB2|NFKBIE	9/69
hsa04330	Notch signaling pathway	0.0519236	0.191199	APH1A|TRAC|DTX3|NOTCH2|NCSTN|CTBP2|JAG1	7/48
hsa00520	Amino sugar and nucleotide sugar metabolism	0.0519236	0.191199	UXS1|TSTA3|UAP1|PGM1|CMAS|HKDC1|CHIA	7/48
hsa04660	T cell receptor signaling pathway	0.0524301	0.192712	IFNG|VAV3|JUN|NFKBIE|MAPK14|PLCG1|CDK4|HGF|PDCD1|HRAS|BCL10|CDC42	12/103
hsa04370	VEGF signaling pathway	0.054018	0.198066	PTK2|PRKCA|HRAS|MAPK14|PLCG1|VEGFA|KDR|CDC42	8/59
hsa04625	C-type lectin receptor signaling pathway	0.0553358	0.202529	IL6|NFATC4|EGR2|IRF9|HRAS|JUN|BCL10|MAPK14|ITPR2|RELB|NFKB2|MDM2	12/104
hsa04392	Hippo signaling pathway - multiple species	0.0562757	0.204982	LATS2|FRMD6|YAP1|FRMD1|SAV1	5/29
hsa04913	Ovarian steroidogenesis	0.0563115	0.204982	CYP2J2|ADCY4|ADCY2|ADCY8|CYP17A1|PRKACB|HSD17B7	7/49
hsa05222	Small cell lung cancer	0.0568077	0.206539	CCNE1|TP53|CCNE2|RXRG|CKS1B|PTK2|CDK4|CDK6|LAMB1|SKP2|MYC	11/93
hsa04114	Oocyte meiosis	0.0570112	0.207154	ADCY4|YWHAZ|CAMK2G|ADCY2|FBXO43|CCNE2|CCNE1|ADCY8|CPEB3|MAPK14|ITPR2|REC8|PRKACB|YWHAB	14/128
hsa00620	Pyruvate metabolism	0.0574486	0.207766	ALDH3A2|ACSS2|ALDH2|ALDH9A1|GLO1|LDHB	6/39
hsa00140	Steroid hormone biosynthesis	0.0580507	0.207806	CYP7B1|CYP2E1|CYP17A1|UGT1A8|UGT1A4|CYP11B2|CYP7A1|HSD17B7	8/60
hsa04730	Long-term depression	0.0580507	0.207806	GNAQ|PRKCA|HRAS|GNA13|PPP1R17|ITPR2|LYN|GNAI1	8/60
hsa03010	Ribosome	0.0597021	0.210683	RPS13|MRPL24|RPS24|MRPL13|MRPL14|MRPS9|MRPS6|RPL37|MRPS5|MRPS10|RPL30|MRPS16|RPS5|MRPS14|RPLP2|MRPL9	16/153
hsa04979	Cholesterol metabolism	0.0609224	0.210683	VAPB|POGZ|ANGPTL3|SORT1|VDAC2|CYP7A1|OSBPL5	7/50
hsa05110	Vibrio cholerae infection	0.0609224	0.210683	PRKCA|ATP6V1H|PLCG1|PRKACB|ATP6V0D2|ATP6V1C1|SEC61A2	7/50
hsa00330	Arginine and proline metabolism	0.0609224	0.210683	HOGA1|ALDH3A2|ALDH2|OAT|ALDH9A1|GOT2|ALDH18A1	7/50
hsa05132	Salmonella infection	0.0614506	0.210683	IL6|DYNC1I1|RHOG|JUN|MAPK14|IFNG|WASL|SCT|KLC4|CDC42	10/83
hsa04922	Glucagon signaling pathway	0.0614672	0.210683	PRKAB2|GNAQ|ADCY2|CREB5|CAMK2G|PRKAA1|CRTC2|CREB3L4|PRKACB|ITPR2|PYGL|LDHB	12/106
hsa00561	Glycerolipid metabolism	0.0622685	0.210683	PNLIPRP1|PLPP3|ALDH3A2|GLYCTK|ALDH2|DGKI|ALDH9A1|DGKB	8/61
hsa05218	Melanoma	0.0622838	0.210683	PDGFRA|TP53|HRAS|MET|CDK4|CDK6|MDM2|FGF10|FGF21	9/72
hsa00760	Nicotinate and nicotinamide metabolism	0.0624519	0.210683	NADK2|NAPRT|NNT|POMP|NAMPT	5/30
hsa00630	Glyoxylate and dicarboxylate metabolism	0.0624519	0.210683	HOGA1|MMUT|GLYCTK|SHMT2|ACSS2	5/30
hsa00030	Pentose phosphate pathway	0.0624519	0.210683	PRPS1L1|TKT|GLYCTK|PGM1|TALDO1	5/30
hsa04213	Longevity regulating pathway - multiple species	0.0666726	0.214282	ADCY4|PRKAB2|ADCY2|HRAS|EIF4EBP2|ADCY8|PRKAA1|PRKACB	8/62
hsa05332	Graft-versus-host disease	0.0683551	0.218411	GZMB|IFNG|IL6|FASLG|HLA-DMB|HLA-DMA	6/41
hsa05219	Bladder cancer	0.0683551	0.218411	TP53|HRAS|VEGFA|CDK4|MDM2|MYC	6/41
hsa04152	AMPK signaling pathway	0.0685182	0.218816	CRTC2|CCN1|PRKAB2|CCNA1|CREB5|SLC2A4|PRKAA1|LEPR|RAB2A|SREBF1|CREB3L4|ADIPOR2|RHEB	13/120
hsa05140	Leishmaniasis	0.0704882	0.22357	IFNG|FCGR3A|JUN|FCGR2A|MAPK14|FCGR1A|JAK1|HLA-DMB|HLA-DMA	9/74
hsa05135	Yersinia infection	0.0717923	0.224322	IL6|PTK2|MAP2K6|PIP5K1A|JUN|MAPK14|SKAP2|PLCG1|WASL|MAP2K4|FYB1|VAV3|CDC42	13/121
hsa00380	Tryptophan metabolism	0.0742274	0.228587	ALDH3A2|ALDH2|DHTKD1|ECHS1|ALDH9A1|KYAT3	6/42
hsa01230	Biosynthesis of amino acids	0.0748305	0.23021	TALDO1|PRPS1L1|BCAT2|MAT1A|TKT|GOT2|ALDH18A1|PGK2|SHMT2	9/75
hsa03040	Spliceosome	0.0781734	0.234335	CDC5L|DDX42|RBMXP1|DDX5|SF3B4|ACIN1|MAGOHB|RBMXL1|PPIL1|PUF60|HNRNPM|LSM8|PRPF3|HNRNPC	14/135
hsa04142	Lysosome	0.0786414	0.234335	DNASE2B|CTSK|CTSL|LAPTM4B|CTSB|ATP6V1H|POGZ|GGA2|SMPD1|SORT1|ATP6V0D2|CTSS|CTNS	13/123
hsa05133	Pertussis	0.0793335	0.234335	IL6|TIRAP|PSAP|JUN|MAPK14|C1S|SFTPA2|LY96|GNAI1	9/76
hsa04120	Ubiquitin mediated proteolysis	0.0850408	0.237101	UBE2Q1|SKP2|WWP1|UBR5|PRKN|ELOC|UBA7|FBXO4|UBE2G2|RHOBTB2|MDM2|UBE2U|UBE2W|PIAS3	14/137
hsa05235	PD-L1 expression and PD-1 checkpoint pathway in cancer	0.0856514	0.238583	TIRAP|IFNG|HRAS|JUN|NFKBIE|MAPK14|PLCG1|MAP2K6|JAK1|PDCD1	10/89
hsa00071	Fatty acid degradation	0.0868037	0.240904	CYP4A11|ALDH3A2|ALDH2|ACSL5|ECHS1|ALDH9A1	6/44
hsa05130	Pathogenic Escherichia coli infection	0.0873445	0.24196	YWHAZ|TUBA3C|PRKCA|ARHGEF2|WASL|LY96|CDC42	7/55
hsa00640	Propanoate metabolism	0.0907809	0.250446	MMUT|ACSS2|SUCLG1|LDHB|ECHS1	5/34
hsa00534	Glycosaminoglycan biosynthesis - heparan sulfate / heparin	0.0915912	0.250962	HS2ST1|EXTL2|EXTL3|EXT1	4/24
hsa03018	RNA degradation	0.0938071	0.256335	LSM8|TENT4A|PABPC1|PABPC3|CNOT9|DCP1B|DCP1A|CNOT2|EXOSC1	9/79
hsa05031	Amphetamine addiction	0.0970315	0.260086	CREB3L4|PRKCA|CREB5|CAMK2G|JUN|ARC|GRIN2D|PRKACB	8/68
hsa00010	Glycolysis / Gluconeogenesis	0.0970315	0.260086	ALDH3A2|ACSS2|PGM1|ALDH2|HKDC1|ALDH9A1|PGK2|LDHB	8/68
hsa04140	Autophagy - animal	0.0975355	0.260533	BNIP3|DEPTOR|CTSB|SH3GLB1|PRKAA1|ATG4B|STX17|PRKACB|CTSL|RB1CC1|RHEB|HRAS|NRBF2	13/128
hsa04658	Th1 and Th2 cell differentiation	0.0996453	0.260533	IFNG|JUN|NOTCH2|NFKBIE|MAPK14|PLCG1|JAK1|JAG1|HLA-DMB|HLA-DMA	10/92
hsa00592	alpha-Linolenic acid metabolism	0.101303	0.260533	PLA2G2A|PLA2G12B|PLA2G2C|PLA2G5	4/25
hsa01200	Carbon metabolism	0.103066	0.260533	ECHS1|PRPS1L1|ACSS2|TALDO1|GLYCTK|MMUT|TKT|SUCLG1|HKDC1|GOT2|PGK2|SHMT2	12/117
hsa05034	Alcoholism	0.103998	0.26278	ADORA2A|GRIN2D|SLC29A1|HDAC9|HRAS|CAMKK1|GNG12|PKIA|MACROH2A2|GNG2|NTRK2|GNGT1|HGF|CREB3L4|CREB5|SHC1|GNAI1	17/180
hsa00600	Sphingolipid metabolism	0.107704	0.270673	PLPP3|CERS2|SMPD1|SPTLC1|NEU4|NEU2	6/47
hsa04662	B cell receptor signaling pathway	0.109718	0.271663	INPP5D|VAV3|JUN|NFKBIE|HGF|LYN|HRAS|BCL10|CD19	9/82
hsa05204	Chemical carcinogenesis	0.109718	0.271663	ARNT|GSTA5|GSTA1|GSTA2|UGT1A8|CYP2E1|UGT1A4|KYAT3|CYP2C18	9/82
hsa04950	Maturity onset diabetes of the young	0.111466	0.274528	NEUROG3|PDX1|HNF4G|HHEX	4/26
hsa05216	Thyroid cancer	0.115676	0.283165	TP53|MYC|RXRG|TPM3|HRAS	5/37
hsa05322	Systemic lupus erythematosus	0.118967	0.286622	IFNG|C7|FCGR3A|C9|C8B|FCGR2A|TRIM21|C8A|MACROH2A2|FCGR1A|C1S|HLA-DMB|HLA-DMA	13/133
hsa05416	Viral myocarditis	0.119297	0.286622	MYH6|MYH7|EIF4G3|SGCB|HLA-DMA|HLA-DMB|CAV1	7/60
hsa00062	Fatty acid elongation	0.122061	0.286622	ECHS1|THEM5|THEM4|ELOVL3	4/27
hsa05030	Cocaine addiction	0.122946	0.286622	CREB3L4|CREB5|JUN|GRIN2D|PRKACB|GNAI1	6/49
hsa04672	Intestinal immune network for IgA production	0.122946	0.286622	TNFRSF13B|IL15RA|IL6|CCL28|HLA-DMB|HLA-DMA	6/49
hsa00450	Selenocompound metabolism	0.122969	0.286622	SEPHS1|KYAT3|SLA	3/17
hsa00120	Primary bile acid biosynthesis	0.122969	0.286622	CYP7B1|CYP7A1|CYP39A1	3/17
hsa05330	Allograft rejection	0.124626	0.288137	IFNG|FASLG|HLA-DMB|GZMB|HLA-DMA	5/38
hsa00650	Butanoate metabolism	0.133065	0.304502	ECHS1|HMGCLL1|OXCT1|HMGCS1	4/28
hsa04810	Regulation of actin cytoskeleton	0.133629	0.305676	SPATA13|PDGFRA|FGF10|GNA13|PIP5K1A|INSRR|MYLK3|GNG12|ITGAE|ITGA10|CDC42|WASL|HRAS|HGF|IQGAP3|PTK2|VAV3|PIP4K2C|FGF21	19/214
hsa04914	Progesterone-mediated oocyte maturation	0.137132	0.310112	ADCY4|HSP90AB1|CCN1|ADCY2|CCNA1|ADCY8|CPEB3|MAPK14|PRKACB|GNAI1	10/99
hsa04668	TNF signaling pathway	0.139909	0.314889	IL6|SELE|CREB5|JUN|IL18R1|MAPK14|RIPK3|MAP2K6|CREB3L4|MAP2K4|JAG1	11/112
hsa05162	Measles	0.142893	0.314889	EIF3H|TP53|CCNE2|ADAR|CCNE1|JUN|IL6|CDK4|CDK6|JAK1|FASLG|IRF9|SLAMF1	13/138
hsa04064	NF-kappa B signaling pathway	0.143023	0.314889	TIRAP|BCL10|PLAU|PIDD1|PLCG1|LY96|RELB|NFKB2|LYN|IL1R1	10/100
hsa00770	Pantothenate and CoA biosynthesis	0.15198	0.326273	DPYS|BCAT2|DPYD	3/19
hsa05412	Arrhythmogenic right ventricular cardiomyopathy (ARVC)	0.154827	0.331678	CACNB2|DES|SGCB|ITGA10|SLC8A1|SLC8A3|CACNA2D1|CACNA2D4	8/77
hsa05320	Autoimmune thyroid disease	0.156349	0.333991	GZMB|FASLG|TSHR|TG|HLA-DMB|HLA-DMA	6/53
hsa05164	Influenza A	0.157832	0.336921	PRSS1|NUP98|PRKCA|IRF9|ADAR|IL6|IFNG|TNFRSF10A|CDK4|CDK6|JAK1|FASLG|HLA-DMB|TMPRSS2|HLA-DMA	15/167
hsa05160	Hepatitis C	0.163419	0.34323	YWHAZ|TP53|CLDN23|HRAS|IFNG|EIF3E|HGF|CDK4|CDK6|JAK1|YWHAB|FASLG|MYC|IRF9	14/155
hsa03460	Fanconi anemia pathway	0.165266	0.34323	FANCF|ATRIP|FANCA|REV1|TOP3A|POLH	6/54
hsa00920	Sulfur metabolism	0.167438	0.34323	SELENBP1|IMPAD1	2/10
hsa01523	Antifolate resistance	0.168314	0.343628	IL6|SHMT2|GGH|ALOX12	4/31
hsa05010	Alzheimer disease	0.177868	0.361666	APH1A|GNAQ|NDUFB9|UQCRB|ATP5PB|NDUFA9|NDUFS2|NDUFS6|ITPR2|GRIN2D|NDUFA4L2|ATF6|NCSTN|UQCRFS1|COX6C	15/171
hsa04657	IL-17 signaling pathway	0.179678	0.364853	HSP90AB1|IFNG|JUN|MAPK14|IL6|S100A9|S100A8|IL25|S100A7	9/93
hsa00480	Glutathione metabolism	0.183718	0.368963	GSR|GSTA5|GCLC|GSTA2|GSTA1|RRM2B	6/56
hsa04962	Vasopressin-regulated water reabsorption	0.184364	0.36977	DYNC1I1|DCTN2|CREB5|CREB3L4|PRKACB	5/44
hsa04931	Insulin resistance	0.194579	0.37991	PRKAB2|CREB5|SLC2A4|PRKAA1|IL6|CRTC2|CREB3L4|SREBF1|PYGL|PRKCZ	10/108
hsa00900	Terpenoid backbone biosynthesis	0.198912	0.385999	HMGCS1|IDI2|PDSS2	3/22
hsa04930	Type II diabetes mellitus	0.206259	0.398882	HKDC1|PDX1|SLC2A4|CACNA1E|PRKCZ	5/46
hsa04130	SNARE interactions in vesicular transport	0.206409	0.398882	SEC22B|BET1|VAMP4|STX17	4/34
hsa04614	Renin-angiotensin system	0.215258	0.403709	ACE2|CMA1|HK1	3/23
hsa00340	Histidine metabolism	0.215258	0.403709	ALDH3A2|ALDH9A1|ALDH2	3/23
hsa03060	Protein export	0.215258	0.403709	IMMP2L|SEC61A2|SRPRA	3/23
hsa04141	Protein processing in endoplasmic reticulum	0.218954	0.410003	OS9|TRAM1|DERL1|DNAJC5B|PRKN|HSP90AB1|DNAJB12|DERL2|UBE2G2|SEC24C|SEC61A2|ATF6|SEC31B|MAN1A2	14/165
hsa04670	Leukocyte transendothelial migration	0.223026	0.415953	PTK2|PRKCA|VAV3|RAP1B|MAPK14|CLDN23|PLCG1|ARHGAP5|GNAI1|CDC42	10/112
hsa01524	Platinum drug resistance	0.225043	0.419454	TP53|GSTA5|GSTA1|GSTA2|FASLG|MDM2|POLH	7/73
hsa04512	ECM-receptor interaction	0.225398	0.419986	TNR|SDC4|THBS3|LAMB1|ITGA10|COL1A2|COL1A1|SV2A	8/86
hsa00500	Starch and sucrose metabolism	0.233055	0.430199	HKDC1|PYGL|PGM1|AMY2B	4/36
hsa03450	Non-homologous end-joining	0.236649	0.430199	DCLRE1C|PRKDC	2/13
hsa05212	Pancreatic cancer	0.243638	0.442239	TP53|PLD1|CDK4|CDK6|JAK1|VEGFA|CDC42	7/75
hsa00563	Glycosylphosphatidylinositol (GPI)-anchor biosynthesis	0.248705	0.44807	PIGP|PIGC|PIGK	3/25
hsa00510	N-Glycan biosynthesis	0.25232	0.453771	DOLK|ALG6|ALG10B|MGAT4A|MAN1A2	5/50
hsa03320	PPAR signaling pathway	0.253112	0.454923	HMGCS1|CYP4A11|RXRG|ACSL5|FABP4|FABP5|CYP7A1	7/76
hsa00980	Metabolism of xenobiotics by cytochrome P450	0.253112	0.454923	GSTA5|GSTA1|GSTA2|DHDH|CYP2E1|UGT1A4|UGT1A8	7/76
hsa05014	Amyotrophic lateral sclerosis (ALS)	0.26422	0.466012	MAPK14|DERL1|TP53|MAP2K6|GRIN2D	5/51
hsa04721	Synaptic vesicle cycle	0.272373	0.477602	AP2S1|ATP6V1H|DNM3|AP2A2|ATP6V0D2|ATP6V1C1|SLC1A3	7/78
hsa04137	Mitophagy - animal	0.275068	0.481489	TP53|TFEB|HRAS|JUN|PRKN|BNIP3	6/65
hsa00601	Glycosphingolipid biosynthesis - lacto and neolacto series	0.282852	0.486648	B3GALT5|FUT2|ST8SIA1	3/27
hsa04966	Collecting duct acid secretion	0.282852	0.486648	ATP6V0D2|ATP6V1C1|CA2	3/27
hsa04744	Phototransduction	0.300079	0.486648	GNAT2|SAG|GNGT1	3/28
hsa05131	Shigellosis	0.307679	0.486648	MAPK14|RIPK2|WASL|RHOG|ELMO2|CDC42	6/68
hsa00524	Neomycin, kanamycin and gentamicin biosynthesis	0.318227	0.486648	HKDC1	1/5
hsa00400	Phenylalanine, tyrosine and tryptophan biosynthesis	0.318227	0.486648	GOT2	1/5
hsa04917	Prolactin signaling pathway	0.329775	0.500164	SHC1|PRLR|HRAS|MAPK14|CYP17A1|HGF	6/70
hsa05170	Human immunodeficiency virus 1 infection	0.337402	0.500445	PTK2|NFATC4|GNAQ|PRKCA|HRAS|JUN|GNG12|ELOC|MAPK14|PLCG1|FASLG|MAP2K6|GNGT1|ITPR2|GNG2|GNAI1	16/212
hsa05145	Toxoplasmosis	0.34203	0.500445	IFNG|MAPK14|LAMB1|MAP2K6|JAK1|LY96|HLA-DMA|HLA-DMB|GNAI1	9/113
hsa05310	Asthma	0.351914	0.500445	FCER1A|HLA-DMB|HLA-DMA	3/31
hsa04520	Adherens junction	0.35206	0.500445	FARP2|SSX2IP|MET|WASL|SNAI2|CDC42	6/72
hsa00511	Other glycan degradation	0.353332	0.500445	NEU4|NEU2	2/18
hsa01210	2-Oxocarboxylic acid metabolism	0.353332	0.500445	GOT2|BCAT2	2/18
hsa00061	Fatty acid biosynthesis	0.353332	0.500445	OLAH|ACSL5	2/18
hsa03022	Basal transcription factors	0.359711	0.500445	GTF2B|TAF8|TAF2|GTF2F2	4/45
hsa00440	Phosphonate and phosphinate metabolism	0.360397	0.500445	CEPT1	1/6
hsa05142	Chagas disease (American trypanosomiasis)	0.380389	0.517978	IL6|GNAQ|IFNG|JUN|MAPK14|FASLG|MAP2K4|GNAI1	8/103
hsa04340	Hedgehog signaling pathway	0.388293	0.517978	CSNK1A1L|PRKACB|GLI1|SUFU	4/47
hsa04620	Toll-like receptor signaling pathway	0.389907	0.517978	IL6|CTSK|TIRAP|JUN|MAPK14|MAP2K6|MAP2K4|LY96	8/104
hsa00040	Pentose and glucuronate interconversions	0.403267	0.520814	UGT1A4|DHDH|UGT1A8	3/34
hsa04740	Olfactory transduction	0.42321	0.538893	OR2J1|OR10Z1|OR10T2|ANO2|OR10K2|OR10K1|OR10X1|OR6S1|NCALD|PDE1C|OR4L1|SLC8A1|SLC8A3|OR6K3|OR6K2|CAMK2G|OR6K6|OR10J4|OR10J1|OR10J3|OR9Q1|OR6P1|OR4E2|OR4E1|OR4K15|OR4K14|OR4K17|OR6J1|PRKACB|OR6N1|OR6N2	31/448
hsa04122	Sulfur relay system	0.437075	0.538893	MOCS2	1/8
hsa00740	Riboflavin metabolism	0.437075	0.538893	FLAD1	1/8
hsa00514	Other types of O-glycan biosynthesis	0.44212	0.543006	COLGALT2|GXYLT2	2/22
hsa04977	Vitamin digestion and absorption	0.483936	0.572588	SLC19A2|SLC19A3	2/24
hsa05134	Legionellosis	0.499563	0.583281	IL6|SEC22B|NFKB2|BNIP3	4/55
hsa00260	Glycine, serine and threonine metabolism	0.50164	0.583281	GLYCTK|SHMT2|AGXT2	3/40
hsa05210	Colorectal cancer	0.507099	0.585987	BCL2L11|HRAS|JUN|HGF|TP53|MYC	6/86
hsa00860	Porphyrin and chlorophyll metabolism	0.532571	0.604365	UGT1A4|COX10|UGT1A8	3/42
hsa05213	Endometrial cancer	0.539054	0.60859	HGF|MYC|TP53|HRAS	4/58
hsa00052	Galactose metabolism	0.613852	0.660662	HKDC1|PGM1	2/31
hsa00512	Mucin type O-glycan biosynthesis	0.613852	0.660662	ST3GAL1|C1GALT1	2/31
hsa00533	Glycosaminoglycan biosynthesis - keratan sulfate	0.616246	0.660662	ST3GAL1	1/14
hsa00051	Fructose and mannose metabolism	0.646047	0.685432	TSTA3|HKDC1	2/33
hsa03410	Base excision repair	0.646047	0.685432	PARP4|NEIL2	2/33
hsa04215	Apoptosis - multiple species	0.646047	0.685432	BOK|BCL2L11	2/33
hsa00360	Phenylalanine metabolism	0.683156	0.71451	GOT2	1/17
hsa00250	Alanine, aspartate and glutamate metabolism	0.690294	0.721476	GOT2|AGXT2	2/36
hsa00531	Glycosaminoglycan degradation	0.72115	0.745851	HYAL1	1/19
hsa01212	Fatty acid metabolism	0.725739	0.750469	ECHS1|ELOVL3|ACSL5	3/57
hsa00670	One carbon pool by folate	0.738404	0.759533	SHMT2	1/20
hsa00532	Glycosaminoglycan biosynthesis - chondroitin sulfate / dermatan sulfate	0.738404	0.759533	CHST3	1/20
hsa05033	Nicotine addiction	0.742081	0.762666	CHRNB2|GRIN2D	2/40
hsa00220	Arginine biosynthesis	0.75459	0.773023	GOT2	1/21
hsa00970	Aminoacyl-tRNA biosynthesis	0.807894	0.82053	AARS2|TARS2|SLA	3/66
hsa01040	Biosynthesis of unsaturated fatty acids	0.832721	0.8415	ELOVL3	1/27
hsa00020	Citrate cycle (TCA cycle)	0.861896	0.868222	SUCLG1	1/30
hsa04136	Autophagy - other	0.878461	0.883435	ATG4B	1/32
hsa00350	Tyrosine metabolism	0.905872	0.909033	GOT2	1/36
hsa03030	DNA replication	0.905872	0.909033	DNA2	1/36
hsa04622	RIG-I-like receptor signaling pathway	0.942179	0.943428	MAPK14|RNF125	2/70
hsa05168	Herpes simplex virus 1 infection	0.985213	0.986192	ZNF324B|ZNF334|RHEB|TP53|ZNF559|ZNF7|ZNF286B|ZNF624|HLA-DMB|IRF9|ZNF623|IL6|IFNG|ZNF436|FASLG|ZNF584|JAK1|ZNF132|POU2F1|ZNF286A|HLA-DMA	21/492
hsa03008	Ribosome biogenesis in eukaryotes	0.998859	0.998859	DROSHA	1/105
